# Supplementary material
Source: publisher figshare collection journal article supplement (https://gsajournals.figshare.com/ndownloader/files/20183159)
Supplement: Supplementary file 1 [file 20183159]

## Sheet: Sheet1
Table S4.928 ORFs with the same nsSNPs shared by strains GJ0703 and CT18
14028S gene	GJ0703 gene	CT18 gene	Gene Name	Species	COG_ONTOLOGY	GOTERM_BP_DIRECT	GOTERM_CC_DIRECT	GOTERM_MF_DIRECT	INTERPRO	KEGG_PATHWAY	PIR_SUPERFAMILY	SMART	UP_KEYWORDS	COG class	UP_SEQ_FEATURE	Number of nsSNP	Length of ORF	Incidence of SNP
STM14_3084	GJ0703GL001387	STY2761	hypothetical protein(STY2761)	S. Typhi str. CT18									Complete proteome,Signal,		signal peptide,	17	963	0.0176532
STM14_3968	GJ0703GL000630	STY3466	ribosome-binding factor A(STY3466)	S. Typhi str. CT18		GO:0006364~rRNA processing,	GO:0005737~cytoplasm,		IPR000238:Ribosome-binding factor A,IPR015946:K homology domain-like, alpha/beta,IPR020053:Ribosome-binding factor A, conserved site,IPR023799:Ribosome-binding factor A domain,				Complete proteome,Cytoplasm,rRNA processing,	Translation, ribosomal structure and biogenesis	chain:Ribosome-binding factor A,	7	399	0.0175439
STM14_1400	GJ0703GL002776	STY1264	secreted effector protein SifA(sifA)	S. Typhi str. CT18					IPR010637:Sif,	sty05132:Salmonella infection,			Complete proteome,		chain:Secreted effector protein sifA,helix,mutagenesis site,region of interest:Interaction with host PLEKHM2,strand,turn,	16	1008	0.015873
STM14_3893	GJ0703GL000698	STY3394	methyl-accepting chemotaxis protein II(cheM)	S. Typhi str. CT18		GO:0006935~chemotaxis,	GO:0016021~integral component of membrane,	GO:0004871~signal transducer activity,	IPR003660:HAMP linker domain,IPR004089:Methyl-accepting chemotaxis protein (MCP) signalling domain,IPR004090:Chemotaxis methyl-accepting receptor,IPR024478:4HB MCP domain,	sty02020:Two-component system,sty02030:Bacterial chemotaxis,		SM00283:MA,SM00304:HAMP,	Complete proteome,Membrane,Transmembrane,Transmembrane helix,	Cell motility and secretion / Signal transduction mechanisms	chain:Methyl-accepting chemotaxis protein II,domain:HAMP,domain:Methyl-accepting transducer,helix,modified residue,region of interest:The 3 Arg may form a positively charged pocket, which binds the alpha-carboxyl group of the attractant AA,sequence conflict,signal peptide,strand,topological domain:Cytoplasmic,topological domain:Periplasmic,transmembrane region,turn,	18	1566	0.0114943
STM14_1486	GJ0703GL002760	STY1893	bacteriophage protein(STY1893)	S. Typhi str. CT18					IPR022074:Protein of unknown function DUF3626,				Complete proteome,			12	1122	0.0106952
STM14_0460	GJ0703GL003543	STY0422	hypothetical protein(STY0422)	S. Typhi str. CT18									Complete proteome,			2	189	0.010582
STM14_5213	GJ0703GL001514	STY1019	prophage Kil protein(STY1019)	S. Typhi str. CT18		GO:0051301~cell division,							Cell cycle,Cell division,Complete proteome,			2	192	0.0104167
STM14_1696	GJ0703GL002598	STY1720	pathogenicity island effector protein(sseC)	S. Typhi str. CT18		GO:0009405~pathogenesis,			IPR006972:Secretion system effector C, SseC-like,	sty05132:Salmonella infection,			Coiled coil,Complete proteome,	Function unknown		15	1452	0.0103306
STM14_5409	GJ0703GL004115	STY4861	hypothetical protein(STY4861)	S. Typhi str. CT18				GO:0016787~hydrolase activity,	IPR002925:Dienelactone hydrolase,				Complete proteome,Hydrolase,	Secondary metabolites biosynthesis, transport, and catabolism		5	525	0.00952381
STM14_5004	GJ0703GL004502	STY3722	thiamine-phosphate pyrophosphorylase(thiE)	S. Typhi str. CT18		GO:0009228~thiamine biosynthetic process,GO:0009229~thiamine diphosphate biosynthetic process,		GO:0000287~magnesium ion binding,GO:0004789~thiamine-phosphate diphosphorylase activity,	IPR003733:Thiamine phosphate synthase,IPR013785:Aldolase-type TIM barrel,IPR022998:Thiamin phosphate synthase superfamily,	sty00730:Thiamine metabolism,sty01100:Metabolic pathways,			Complete proteome,Magnesium,Metal-binding,Thiamine biosynthesis,Transferase,	Coenzyme metabolism	chain:Thiamine-phosphate pyrophosphorylase,metal ion-binding site:Magnesium,	6	633	0.00947867
STM14_5146	GJ0703GL004377	STY4478	cytochrome c-type biogenesis protein(STY4478)	S. Typhi str. CT18			GO:0016021~integral component of membrane,		IPR005614:NrfD family,IPR017566:NrfD,				Complete proteome,Membrane,Transmembrane,Transmembrane helix,	Inorganic ion transport and metabolism		9	954	0.00943396
STM14_5157	GJ0703GL004369	STY4486	acetyltransferase(STY4486)	S. Typhi str. CT18				GO:0008080~N-acetyltransferase activity,	IPR000182:GNAT domain,IPR016181:Acyl-CoA N-acyltransferase,				Complete proteome,Transferase,	Amino acid transport and metabolism		4	432	0.00925926
STM14_3574	GJ0703GL000984	STY3104	hypothetical protein(yqcC)	S. Typhi str. CT18					IPR007384:Protein of unknown function UCP006257,IPR023376:YqcC-like domain,		PIRSF006257:uncharacterized conserved protein,		Complete proteome,	Function unknown		3	327	0.00917431
STM14_5003	GJ0703GL004503	STY3723	thiamine biosynthesis protein ThiF(STY3723)	S. Typhi str. CT18				GO:0008641~small protein activating enzyme activity,	IPR000594:UBA/THIF-type NAD/FAD binding fold,IPR016040:NAD(P)-binding domain,	sty00730:Thiamine metabolism,sty01100:Metabolic pathways,sty04122:Sulfur relay system,			Complete proteome,	Coenzyme metabolism		6	756	0.00793651
STM14_5257	GJ0703GL004284	STY4731	hypothetical protein(yjfM)	S. Typhi str. CT18					IPR009576:Biofilm formation YgiB,				Complete proteome,	Function unknown		5	636	0.00786164
STM14_1704	GJ0703GL002590	STY1712	pathogenicity island protein(ssaI)	S. Typhi str. CT18		GO:0009306~protein secretion,			IPR012670:Type III secretion system, YscI/HrpB,				Complete proteome,			2	261	0.00766284
STM14_0163	GJ0703GL003826	STY0157	7,8-dihydro-8-oxoguanine-triphosphatase(STY0157)	S. Typhi str. CT18		GO:0006281~DNA repair,		GO:0008413~8-oxo-7,8-dihydroguanosine triphosphate pyrophosphatase activity,	IPR000086:NUDIX hydrolase domain,IPR003561:Mutator MutT,IPR015797:NUDIX hydrolase domain-like,IPR020084:NUDIX hydrolase, conserved site,IPR020476:NUDIX hydrolase,				Complete proteome,Hydrolase,	Nucleotide transport and metabolism		3	393	0.00763359
STM14_4880	GJ0703GL004594	STY3814	hypothetical protein(STY3814)	S. Typhi str. CT18					IPR009959:Polyketide cyclase SnoaL-like domain,				Complete proteome,			3	393	0.00763359
STM14_3698	GJ0703GL000888	STY3217	5-formyltetrahydrofolate cyclo-ligase family protein(STY3217)	S. Typhi str. CT18			GO:0016021~integral component of membrane,	GO:0005524~ATP binding,GO:0030272~5-formyltetrahydrofolate cyclo-ligase activity,GO:0046872~metal ion binding,	IPR002698:5-formyltetrahydrofolate cyclo-ligase,IPR024185:5-formyltetrahydrofolate cyclo-ligase-like domain,	sty00670:One carbon pool by folate,sty01100:Metabolic pathways,	PIRSF006806:5-formyltetrahydrofolate cyclo-ligase,		ATP-binding,Complete proteome,Magnesium,Membrane,Metal-binding,Nucleotide-binding,Transmembrane,Transmembrane helix,	Coenzyme metabolism		4	546	0.00732601
STM14_0681	GJ0703GL003336	STY0627	enterobactin synthetase subunit D(entD)	S. Typhi str. CT18		GO:0009239~enterobactin biosynthetic process,	GO:0009366~enterobactin synthetase complex,GO:0031226~intrinsic component of plasma membrane,	GO:0000287~magnesium ion binding,GO:0008897~holo-[acyl-carrier-protein] synthase activity,	IPR003542:Enterobactin synthetase-like, component D,IPR008278:4'-phosphopantetheinyl transferase superfamily,				Complete proteome,Enterobactin biosynthesis,Magnesium,Membrane,Metal-binding,Transferase,	Secondary metabolites biosynthesis, transport, and catabolism	chain:4'-phosphopantetheinyl transferase entD,metal ion-binding site:Magnesium,sequence conflict,	5	702	0.00712251
STM14_1024	GJ0703GL003064	STY0906	hypothetical protein(STY0906)	S. Typhi str. CT18			GO:0016021~integral component of membrane,		IPR010815:Protein of unknown function DUF1418,				Complete proteome,Membrane,Transmembrane,Transmembrane helix,			2	288	0.00694444
STM14_1958	GJ0703GL002371	STY1445	aminoglycoside 6'-N-acetyltransferase(aac)	S. Typhi str. CT18			GO:0016021~integral component of membrane,	GO:0008080~N-acetyltransferase activity,	IPR000182:GNAT domain,IPR016181:Acyl-CoA N-acyltransferase,IPR024170:Aminoglycoside N6-acetyltransferase,		PIRSF000452:aminoglycoside N6'-acetyltransferase,		Complete proteome,Membrane,Transferase,Transmembrane,Transmembrane helix,	Cell envelope biogenesis, outer membrane		3	435	0.00689655
STM14_5111	GJ0703GL004409	STY4449	lipoprotein(STY4449)	S. Typhi str. CT18									Complete proteome,Lipoprotein,			3	441	0.00680272
STM14_2545	GJ0703GL001895	STY2261	propanediol utilization protein PduV(pduV)	S. Typhi str. CT18		GO:0006576~cellular biogenic amine metabolic process,		GO:0005524~ATP binding,	IPR012381:Ethanolamine/propanediol utilisation protein, EutP/PduV,IPR027417:P-loop containing nucleoside triphosphate hydrolase,		PIRSF036409:ethanolamine/propanediol utilization protein, EutP/PduV type,		Complete proteome,	Amino acid transport and metabolism	chain:Propanediol utilization protein pduV,nucleotide phosphate-binding region:ATP,	3	450	0.00666667
STM14_3467	GJ0703GL001100	STY2989	type III secretion system effector protein OrgC(STY2989)	S. Typhi str. CT18									Complete proteome,			3	450	0.00666667
STM14_3891	GJ0703GL000700	STY3392	siderophore interacting protein(STY3392)	S. Typhi str. CT18	Inorganic ion transport and metabolism,			GO:0016491~oxidoreductase activity,	IPR007037:Siderophore-interacting protein,IPR013113:FAD-binding 9, siderophore-interacting,IPR017927:Ferredoxin reductase-type FAD-binding domain,IPR017938:Riboflavin synthase-like beta-barrel,				Complete proteome,	Inorganic ion transport and metabolism		5	765	0.00653595
STM14_2248	GJ0703GL002100	STY1990	hypothetical protein(STY1990)	S. Typhi str. CT18			GO:0016021~integral component of membrane,						Complete proteome,Membrane,Transmembrane,Transmembrane helix,			3	474	0.00632911
STM14_4744	GJ0703GL004715	STY3616	CyaY protein(STY3616)	S. Typhi str. CT18		GO:0016226~iron-sulfur cluster assembly,		GO:0008199~ferric iron binding,	IPR002908:Frataxin/CyaY,IPR020895:Frataxin conserved site,			SM01219:SM01219,	Complete proteome,	Inorganic ion transport and metabolism	chain:Protein cyaY,	2	318	0.00628931
STM14_3785	GJ0703GL000796	STY3300	hypothetical protein(STY3300)	S. Typhi str. CT18					IPR008514:Virulence factor, secretion apparatus,	sty03070:Bacterial secretion system,			Complete proteome,	Function unknown		3	483	0.00621118
STM14_3914	GJ0703GL000681	STY3412	hypothetical protein(STY3412)	S. Typhi str. CT18			GO:0016021~integral component of membrane,						Complete proteome,Membrane,Transmembrane,Transmembrane helix,	Function unknown		3	483	0.00621118
STM14_2537	GJ0703GL001903	STY2253	propanediol utilization protein PduM(pduM)	S. Typhi str. CT18				GO:0005198~structural molecule activity,					Complete proteome,			3	489	0.00613497
STM14_2353	GJ0703GL002021	STY2143	ferritin(STY2143)	S. Typhi str. CT18		GO:0006826~iron ion transport,GO:0006879~cellular iron ion homeostasis,	GO:0005737~cytoplasm,	GO:0008199~ferric iron binding,	IPR001519:Ferritin,IPR008331:Ferritin/DPS protein domain,IPR009040:Ferritin- like diiron domain,IPR009078:Ferritin-like superfamily,IPR012347:Ferritin-related,				Complete proteome,Cytoplasm,Iron,Iron storage,Metal-binding,	Inorganic ion transport and metabolism		3	495	0.00606061
STM14_4925	GJ0703GL004553	STY3773	hypothetical protein(STY3773)	S. Typhi str. CT18					IPR011727:Conserved hypothetical protein CHP02117,				Complete proteome,Signal,			4	660	0.00606061
STM14_5110	GJ0703GL004410	STY4448	hypothetical protein(STY4448)	S. Typhi str. CT18									Complete proteome,			2	336	0.00595238
STM14_1236	GJ0703GL002915	STY1120	cell invasion protein(sigE)	S. Typhi str. CT18		GO:0009405~pathogenesis,	GO:0005737~cytoplasm,		IPR013095:Type III secretion system chaperone,		PIRSF034754:secretion chaperone protein SigE,		Chaperone,Complete proteome,Cytoplasm,Virulence,		chain:Chaperone protein sigE,	2	339	0.00589971
STM14_4592	GJ0703GL000039	STY3976	hypothetical protein(STY3976)	S. Typhi str. CT18	General function prediction only,			GO:0003824~catalytic activity,	IPR013785:Aldolase-type TIM barrel,				Complete proteome,	General function prediction only		3	528	0.00568182
STM14_0034	GJ0703GL003942	STY0032	fimbrial chaperone(bcfG)	S. Typhi str. CT18	Cell motility and secretion / Intracellular trafficking and secretion,	GO:0043711~pilus organization,GO:0061077~chaperone-mediated protein folding,GO:0071555~cell wall organization,	GO:0030288~outer membrane-bounded periplasmic space,		IPR001829:Pili assembly chaperone, bacterial,IPR008962:PapD-like,IPR016147:Pili assembly chaperone, N-terminal, bacterial,IPR016148:Pili assembly chaperone, C-terminal domain,IPR018046:Pili assembly chaperone, conserved site,				Chaperone,Complete proteome,	Cell motility and secretion / Intracellular trafficking and secretion	signal peptide,	4	729	0.00548697
STM14_4302	GJ0703GL000346	STY4237	hypothetical protein(STY4237)	S. Typhi str. CT18			GO:0016021~integral component of membrane,		IPR019635:Protein of unknown function DUF2500,				3D-structure,Complete proteome,Membrane,Transmembrane,Transmembrane helix,			2	369	0.00542005
STM14_3776	GJ0703GL000803	STY3294	hypothetical protein(STY3294)	S. Typhi str. CT18					IPR021500:Protein of unknown function DUF3156,				Complete proteome,			3	555	0.00540541
STM14_0635	GJ0703GL003381	STY0589	type-1 fimbrial protein subunit A(fimA)	S. Typhi str. CT18		GO:0007155~cell adhesion,	GO:0009289~pilus,		IPR000259:Fimbrial-type adhesion domain,IPR008966:Adhesion domain,				Complete proteome,Disulfide bond,Fimbrium,Signal,	Cell motility and secretion / Intracellular trafficking and secretion	chain:Type-1 fimbrial protein, A chain,disulfide bond,signal peptide,	3	555	0.00540541
STM14_2240	GJ0703GL002107	STY1983	hypothetical protein(STY1983)	S. Typhi str. CT18					IPR009954:Protein of unknown function DUF1482,				Complete proteome,			1	189	0.00529101
STM14_1277	GJ0703GL002883	STY1158	hypothetical protein(STY1158)	S. Typhi str. CT18					IPR009739:Protein of unknown function DUF1311,				Complete proteome,Signal,	Function unknown		2	393	0.00508906
STM14_2165	GJ0703GL002172	STY1917	hydrogenase-1 operon protein HyaE(STY1917)	S. Typhi str. CT18					IPR010893:[NiFe]-hydrogenase maturation factor HyaE,IPR012336:Thioredoxin-like fold,				Complete proteome,			2	402	0.00497512
STM14_3821	GJ0703GL000767	STY3328	hypothetical protein(STY3328)	S. Typhi str. CT18									Complete proteome,			2	408	0.00490196
STM14_1579	GJ0703GL002696	STY1813	MutT-family protein(STY1813)	S. Typhi str. CT18				GO:0016787~hydrolase activity,	IPR000086:NUDIX hydrolase domain,IPR015797:NUDIX hydrolase domain-like,IPR020084:NUDIX hydrolase, conserved site,IPR020476:NUDIX hydrolase,				Complete proteome,Hydrolase,	Nucleotide transport and metabolism		2	414	0.00483092
STM14_1268	GJ0703GL002891	STY1151	copper-sensitivity suppressor protein C(scsC)	S. Typhi str. CT18		GO:0045454~cell redox homeostasis,	GO:0005623~cell,	GO:0015035~protein disulfide oxidoreductase activity,	IPR001853:DSBA-like thioredoxin domain,IPR012336:Thioredoxin-like fold,IPR013766:Thioredoxin domain,IPR017937:Thioredoxin, conserved site,				Complete proteome,Signal,	Posttranslational modification, protein turnover, chaperones	signal peptide,	3	621	0.00483092
STM14_3712	GJ0703GL000876	STY3229	hypothetical protein(STY3229)	S. Typhi str. CT18				GO:0003677~DNA binding,	IPR005175:Domain of unknown function DUF296,				Complete proteome,DNA-binding,	General function prediction only		2	423	0.00472813
STM14_0447	GJ0703GL003555	STY0411	hypothetical protein(STY0411)	S. Typhi str. CT18			GO:0016021~integral component of membrane,		IPR020490:Uncharacterised protein family YaiZ,				Complete proteome,Membrane,Transmembrane,Transmembrane helix,			1	213	0.00469484
STM14_3552	GJ0703GL001016	STY3075	sulfite reductase (NADPH) hemoprotein subunit alpha(STY3075)	S. Typhi str. CT18		GO:0000103~sulfate assimilation,GO:0008652~cellular amino acid biosynthetic process,GO:0019344~cysteine biosynthetic process,GO:0070814~hydrogen sulfide biosynthetic process,	GO:0009337~sulfite reductase complex (NADPH),	GO:0004783~sulfite reductase (NADPH) activity,GO:0020037~heme binding,GO:0046872~metal ion binding,GO:0050661~NADP binding,GO:0051539~4 iron, 4 sulfur cluster binding,	IPR005117:Nitrite/Sulfite reductase ferredoxin-like domain,IPR006066:Nitrite/sulphite reductase iron-sulphur/siroheam-binding site,IPR006067:Nitrite/sulphite reductase 4Fe-4S domain,IPR011786:Sulphite reductase (NADPH) hemoprotein, beta subunit,	sty00920:Sulfur metabolism,sty01100:Metabolic pathways,sty01120:Microbial metabolism in diverse environments,			4Fe-4S,Amino-acid biosynthesis,Complete proteome,Cysteine biosynthesis,Heme,Iron,Iron-sulfur,Metal-binding,NADP,Oxidoreductase,	Inorganic ion transport and metabolism	chain:Sulfite reductase [NADPH] hemoprotein beta-component,metal ion-binding site:Iron (siroheme axial ligand),metal ion-binding site:Iron-sulfur (4Fe-4S),	8	1710	0.00467836
STM14_3345	GJ0703GL001198	STY2891	ABC transporter ATP-binding protein/permease(iroC)	S. Typhi str. CT18	Defense mechanisms,		GO:0016021~integral component of membrane,	GO:0005524~ATP binding,GO:0042626~ATPase activity, coupled to transmembrane movement of substances,	IPR003439:ABC transporter-like,IPR003593:AAA+ ATPase domain,IPR011527:ABC transporter, transmembrane domain, type 1,IPR017871:ABC transporter, conserved site,IPR027417:P-loop containing nucleoside triphosphate hydrolase,			SM00382:AAA,	ATP-binding,Complete proteome,Membrane,Nucleotide-binding,Transmembrane,Transmembrane helix,	Defense mechanisms		17	3654	0.00465244
STM14_3100	GJ0703GL001374	STY2772	polyferredoxin(STY2772)	S. Typhi str. CT18					IPR017896:4Fe-4S ferredoxin-type, iron-sulpur binding domain,IPR017900:4Fe-4S ferredoxin, iron-sulphur binding, conserved site,				Complete proteome,	Energy production and conversion		4	861	0.00464576
STM14_1233	GJ0703GL002917	STY1117	secreted effector protein PipB(pipB)	S. Typhi str. CT18					IPR001646:Pentapeptide repeat,				Complete proteome,	Function unknown	chain:Effector protein pipB2,domain:Pentapeptide repeat 1,domain:Pentapeptide repeat 2,domain:Pentapeptide repeat 3,domain:Pentapeptide repeat 4,	4	873	0.0045819
STM14_2889	GJ0703GL001604	STY2574	PTS system ascorbate-specific transporter subunit IIA(STY2574)	S. Typhi str. CT18				GO:0005215~transporter activity,GO:0016740~transferase activity,	IPR002178:Phosphotransferase system, phosphoenolpyruvate-dependent sugar EIIA 2,IPR016152:Phosphotransferase/anion transporter,	sty00053:Ascorbate and aldarate metabolism,sty01100:Metabolic pathways,sty01120:Microbial metabolism in diverse environments,sty02060:Phosphotransferase system (PTS),			Complete proteome,Transferase,	Carbohydrate transport and metabolism / Signal transduction mechanisms		2	441	0.00453515
STM14_3492	GJ0703GL001075	STY3016	secretory protein(spaM)	S. Typhi str. CT18					IPR002954:Salmonella surface presentation of antigen M protein,				Coiled coil,Complete proteome,			2	441	0.00453515
STM14_2541	GJ0703GL001899	STY2257	propanol dehydrogenase(pduQ)	S. Typhi str. CT18	Energy production and conversion,			GO:0016491~oxidoreductase activity,GO:0046872~metal ion binding,	IPR001670:Alcohol dehydrogenase, iron-type,IPR018211:Alcohol dehydrogenase, iron-type, conserved site,	sty00640:Propanoate metabolism,			Complete proteome,Oxidoreductase,	Energy production and conversion		5	1110	0.0045045
STM14_3572	GJ0703GL000986	STY3102	flavodoxin(STY3102)	S. Typhi str. CT18		GO:0055114~oxidation-reduction process,		GO:0010181~FMN binding,	IPR001094:Flavodoxin,IPR008254:Flavodoxin/nitric oxide synthase,				Complete proteome,Electron transport,Transport,	Energy production and conversion		2	447	0.00447427
STM14_5363	GJ0703GL004185	STY4806	hypothetical protein(STY4806)	S. Typhi str. CT18					IPR004375:Conserved hypothetical protein CHP00022,				Complete proteome,	Carbohydrate transport and metabolism		2	450	0.00444444
STM14_0705	GJ0703GL003314	STY0651	LysR family transcriptional regulator(ybdO)	S. Typhi str. CT18	Transcription,	GO:0006351~transcription, DNA-templated,		GO:0003677~DNA binding,GO:0003700~transcription factor activity, sequence-specific DNA binding,	IPR000847:Transcription regulator HTH, LysR,IPR005119:LysR, substrate-binding,IPR011991:Winged helix-turn-helix DNA-binding domain,				Complete proteome,DNA-binding,Transcription,Transcription regulation,	Transcription		4	900	0.00444444
STM14_2088	GJ0703GL002239	STY1326	indole-3-glycerol phosphate synthase(STY1326)	S. Typhi str. CT18		GO:0000162~tryptophan biosynthetic process,GO:0008652~cellular amino acid biosynthetic process,		GO:0004425~indole-3-glycerol-phosphate synthase activity,GO:0004640~phosphoribosylanthranilate isomerase activity,	IPR001240:N-(5'phosphoribosyl) anthranilate isomerase (PRAI) like domain,IPR001468:Indole-3-glycerol phosphate synthase, conserved site,IPR011060:Ribulose-phosphate binding barrel,IPR013785:Aldolase-type TIM barrel,IPR013798:Indole-3-glycerol phosphate synthase,	sty00400:Phenylalanine, tyrosine and tryptophan biosynthesis,sty01100:Metabolic pathways,sty01110:Biosynthesis of secondary metabolites,sty01230:Biosynthesis of amino acids,			Amino-acid biosynthesis,Aromatic amino acid biosynthesis,Complete proteome,Decarboxylase,Isomerase,Lyase,Multifunctional enzyme,Tryptophan biosynthesis,	Amino acid transport and metabolism	chain:Tryptophan biosynthesis protein trpCF,region of interest:Indole-3-glycerol phosphate synthase,region of interest:N-(5'-phosphoribosyl)anthranilate isomerase,	6	1356	0.00442478
STM14_3716	GJ0703GL000872	STY3233	ABC transporter ATP-binding protein(STY3233)	S. Typhi str. CT18	Inorganic ion transport and metabolism,			GO:0005524~ATP binding,GO:0016887~ATPase activity,	IPR003439:ABC transporter-like,IPR003593:AAA+ ATPase domain,IPR027417:P-loop containing nucleoside triphosphate hydrolase,	sty02010:ABC transporters,		SM00382:AAA,	ATP-binding,Complete proteome,Nucleotide-binding,	Inorganic ion transport and metabolism		3	687	0.00436681
STM14_0769	GJ0703GL003256	STY0706	nucleoside hydrolase(ybeK)	S. Typhi str. CT18		GO:0006206~pyrimidine nucleobase metabolic process,GO:0015949~nucleobase-containing small molecule interconversion,	GO:0005737~cytoplasm,	GO:0045437~uridine nucleosidase activity,	IPR001910:Inosine/uridine-preferring nucleoside hydrolase domain,IPR015910:Inosine/uridine-preferring nucleoside hydrolase, conserved site,IPR022975:Pyrimidine-specific ribonucleoside hydrolase RihA,IPR023186:Inosine/uridine-preferring nucleoside hydrolase,				Complete proteome,Glycosidase,Hydrolase,	Nucleotide transport and metabolism	chain:Pyrimidine-specific ribonucleoside hydrolase rihA,	4	933	0.00428725
STM14_5469	GJ0703GL004066	STY4905	hypothetical protein(STY4905)	S. Typhi str. CT18			GO:0016021~integral component of membrane,		IPR009885:Protein of unknown function DUF1435,				Complete proteome,Membrane,Transmembrane,Transmembrane helix,			1	234	0.0042735
STM14_2020	GJ0703GL002302	STY1391	lipoprotein(STY1391)	S. Typhi str. CT18					IPR010305:Protein of unknown function DUF903,IPR010920:Like-Sm (LSM) domain,				Complete proteome,Lipoprotein,Signal,			1	234	0.0042735
STM14_3640	GJ0703GL000935	STY3159	racemase(STY3159)	S. Typhi str. CT18		GO:0006520~cellular amino acid metabolic process,		GO:0036361~racemase activity, acting on amino acids and derivatives,	IPR001920:Asp/Glu racemase,IPR004380:Aspartate racemase,IPR015942:Asp/Glu/hydantoin racemase,				Complete proteome,Isomerase,	Cell envelope biogenesis, outer membrane		3	705	0.00425532
STM14_5461	GJ0703GL004072	STY4899	hypothetical protein(STY4899)	S. Typhi str. CT18			GO:0016021~integral component of membrane,		IPR010619:Domain of unknown function DUF1212,				Complete proteome,Membrane,Transmembrane,Transmembrane helix,	Function unknown		4	942	0.00424628
STM14_2239	GJ0703GL002108	STY1982	hypothetical protein(STY1982)	S. Typhi str. CT18					IPR009950:Protein of unknown function DUF1480,				Complete proteome,			1	237	0.00421941
STM14_2022	GJ0703GL002300	STY1389	oxidoreductase(STY1389)	S. Typhi str. CT18				GO:0016491~oxidoreductase activity,	IPR002347:Glucose/ribitol dehydrogenase,IPR016040:NAD(P)-binding domain,IPR020904:Short-chain dehydrogenase/reductase, conserved site,				Complete proteome,	Secondary metabolites biosynthesis, transport, and catabolism / General function prediction only		3	711	0.00421941
STM14_4642	GJ0703GL004803	STY3936	membrane transport protein(STY3936)	S. Typhi str. CT18		GO:0055085~transmembrane transport,	GO:0005886~plasma membrane,GO:0016021~integral component of membrane,	GO:0005215~transporter activity,	IPR011701:Major facilitator superfamily,IPR020846:Major facilitator superfamily domain,IPR023697:Multidrug resistance protein MdtL,				Cell inner membrane,Cell membrane,Complete proteome,Membrane,Transmembrane,Transmembrane helix,Transport,	Carbohydrate transport and metabolism	chain:Multidrug resistance protein mdtL,signal peptide,topological domain:Cytoplasmic,topological domain:Periplasmic,transmembrane region,	5	1185	0.00421941
STM14_1691	GJ0703GL002601	STY1724	secretion system protein(ssaE)	S. Typhi str. CT18		GO:0009405~pathogenesis,			IPR012671:Type III secretion system, secretion protein E,				Complete proteome,			1	240	0.00416667
STM14_0642	GJ0703GL003374	STY0598	fimbriae Y protein(fimY)	S. Typhi str. CT18									Complete proteome,		chain:Fimbriae Y protein,	3	720	0.00416667
STM14_4271	GJ0703GL000375	STY4265	acetyltransferase(STY4265)	S. Typhi str. CT18	Translation, ribosomal structure and biogenesis,			GO:0008080~N-acetyltransferase activity,	IPR000182:GNAT domain,IPR016181:Acyl-CoA N-acyltransferase,				Complete proteome,Transferase,	Translation, ribosomal structure and biogenesis		2	486	0.00411523
STM14_0402	GJ0703GL003595	STY0378	hypothetical protein(STY0378)	S. Typhi str. CT18			GO:0016021~integral component of membrane,						Complete proteome,Membrane,Transmembrane,Transmembrane helix,			2	486	0.00411523
STM14_5078	GJ0703GL004438	STY4420	capsule biosynthesis protein(STY4420)	S. Typhi str. CT18					IPR010425:Domain of unknown function DUF1017,				Complete proteome,Signal,			3	735	0.00408163
STM14_3480	GJ0703GL001087	STY3004	acyl carrier protein(sipF)	S. Typhi str. CT18		GO:0006633~fatty acid biosynthetic process,	GO:0005737~cytoplasm,		IPR003231:Acyl carrier protein (ACP),IPR009081:Acyl carrier protein-like,				Complete proteome,Cytoplasm,Phosphopantetheine,Phosphoprotein,	Lipid metabolism / Secondary metabolites biosynthesis, transport, and catabolism	chain:Probable acyl carrier protein iacP,modified residue,sequence conflict,	1	246	0.00406504
STM14_1529	GJ0703GL002732	STY1854	hypothetical protein(STY1854)	S. Typhi str. CT18		GO:0071229~cellular response to acid chemical,			IPR024753:Regulatory protein AriR,				Complete proteome,			1	246	0.00406504
STM14_0401	GJ0703GL003596	STY0377	transmembrane regulator(STY0377)	S. Typhi str. CT18		GO:0000160~phosphorelay signal transduction system,GO:0006355~regulation of transcription, DNA-templated,	GO:0005622~intracellular,GO:0016021~integral component of membrane,	GO:0003677~DNA binding,	IPR001867:Signal transduction response regulator, C-terminal,IPR011991:Winged helix-turn-helix DNA-binding domain,IPR016032:Signal transduction response regulator, C-terminal effector,			SM00862:SM00862,	Complete proteome,Membrane,Transmembrane,	Transcription		3	741	0.00404858
STM14_1269	GJ0703GL002890	STY1152	copper-sensitivity suppressor protein D(scsD)	S. Typhi str. CT18		GO:0045454~cell redox homeostasis,	GO:0005623~cell,	GO:0016491~oxidoreductase activity,	IPR012336:Thioredoxin-like fold,IPR013740:Redoxin,IPR013766:Thioredoxin domain,				Complete proteome,	Posttranslational modification, protein turnover, chaperones / Energy production and conversion	signal peptide,	2	504	0.00396825
STM14_3637	GJ0703GL000938	STY3156	regulatory protein(STY3156)	S. Typhi str. CT18	Transcription,	GO:0006351~transcription, DNA-templated,GO:0006355~regulation of transcription, DNA-templated,		GO:0003677~DNA binding,	IPR000843:Transcription regulator HTH, LacI,IPR010982:Lambda repressor-like, DNA-binding domain,			SM00354:HTH_LACI,	Complete proteome,DNA-binding,Transcription,Transcription regulation,	Transcription		4	1017	0.00393314
STM14_1106	GJ0703GL002979	STY0978	3-phosphoshikimate 1-carboxyvinyltransferase(STY0978)	S. Typhi str. CT18	Amino acid transport and metabolism,	GO:0008652~cellular amino acid biosynthetic process,GO:0009073~aromatic amino acid family biosynthetic process,GO:0009423~chorismate biosynthetic process,	GO:0005737~cytoplasm,	GO:0003866~3-phosphoshikimate 1-carboxyvinyltransferase activity,	IPR001986:Enolpyruvate transferase domain,IPR006264:3-phosphoshikimate 1-carboxyvinyltransferase,IPR013792:RNA 3'-terminal phosphate cyclase/enolpyruvate transferase, alpha/beta,IPR023193:3-phosphoshikimate 1-carboxyvinyltransferase, conserved site,	sty00400:Phenylalanine, tyrosine and tryptophan biosynthesis,sty01100:Metabolic pathways,sty01110:Biosynthesis of secondary metabolites,sty01130:Biosynthesis of antibiotics,sty01230:Biosynthesis of amino acids,	PIRSF000505:3-phosphoshikimate 1-carboxyvinyltransferase,		Amino-acid biosynthesis,Aromatic amino acid biosynthesis,Complete proteome,Cytoplasm,Transferase,	Amino acid transport and metabolism	chain:3-phosphoshikimate 1- carboxyvinyltransferase,sequence conflict,sequence variant,	5	1281	0.0039032
STM14_3553	GJ0703GL001015	STY3076	sulfite reductase (NADPH) flavoprotein subunit beta(STY3076)	S. Typhi str. CT18	Inorganic ion transport and metabolism,	GO:0000103~sulfate assimilation,GO:0008652~cellular amino acid biosynthetic process,GO:0019344~cysteine biosynthetic process,GO:0070814~hydrogen sulfide biosynthetic process,		GO:0004783~sulfite reductase (NADPH) activity,GO:0010181~FMN binding,GO:0050660~flavin adenine dinucleotide binding,	IPR001094:Flavodoxin,IPR001433:Oxidoreductase FAD/NAD(P)-binding,IPR001709:Flavoprotein pyridine nucleotide cytochrome reductase,IPR003097:FAD-binding, type 1,IPR008254:Flavodoxin/nitric oxide synthase,IPR010199:Sulphite reductase [NADPH] flavoprotein, alpha chain,IPR017927:Ferredoxin reductase-type FAD-binding domain,IPR017938:Riboflavin synthase-like beta-barrel,IPR023173:NADPH-cytochrome p450 …	sty00920:Sulfur metabolism,sty01100:Metabolic pathways,sty01120:Microbial metabolism in diverse environments,	PIRSF000207:sulfite reductase [NADPH], flavoprotein (alpha) component,		Amino-acid biosynthesis,Complete proteome,Cysteine biosynthesis,Electron transport,FAD,Flavoprotein,FMN,NADP,Oxidoreductase,Transport,	Inorganic ion transport and metabolism	binding site:NADP,chain:Sulfite reductase [NADPH] flavoprotein alpha-component,domain:FAD-binding FR-type,domain:Flavodoxin-like,nucleotide phosphate-binding region:FAD,nucleotide phosphate-binding region:FMN,nucleotide phosphate-binding region:NADP,	7	1797	0.00389538
STM14_3156	GJ0703GL001322	STY2822	ferredoxin(STY2822)	S. Typhi str. CT18					IPR017896:4Fe-4S ferredoxin-type, iron-sulpur binding domain,IPR017900:4Fe-4S ferredoxin, iron-sulphur binding, conserved site,				Complete proteome,	Energy production and conversion		1	258	0.00387597
STM14_2994	GJ0703GL001468	STY2674	transcriptional regulator(ptsJ)	S. Typhi str. CT18	Transcription / Amino acid transport and metabolism,	GO:0006351~transcription, DNA-templated,		GO:0003677~DNA binding,GO:0003700~transcription factor activity, sequence-specific DNA binding,GO:0003824~catalytic activity,GO:0030170~pyridoxal phosphate binding,	IPR000524:Transcription regulator HTH, GntR,IPR004839:Aminotransferase, class I/classII,IPR011991:Winged helix-turn-helix DNA-binding domain,IPR015421:Pyridoxal phosphate-dependent transferase, major region, subdomain 1,IPR015424:Pyridoxal phosphate-dependent transferase,			SM00345:HTH_GNTR,	Complete proteome,DNA-binding,Transcription,Transcription regulation,	Transcription / Amino acid transport and metabolism	chain:Putative transcriptional regulatory protein ptsJ,DNA-binding region:H-T-H motif,domain:HTH gntR-type,modified residue,	5	1290	0.00387597
STM14_1717	GJ0703GL002578	STY1699	type III secretion protein(ssaT)	S. Typhi str. CT18		GO:0006605~protein targeting,	GO:0005622~intracellular,GO:0005886~plasma membrane,GO:0016021~integral component of membrane,		IPR002010:Type III secretion system inner membrane R protein,IPR006304:Type III secretion protein SpaR/YscT,	sty03070:Bacterial secretion system,			Cell membrane,Complete proteome,Membrane,Transmembrane,Transmembrane helix,	Intracellular trafficking and secretion	chain:Secretion system apparatus protein ssaT,transmembrane region,	3	777	0.003861
STM14_1700	GJ0703GL002594	STY1716	pathogenicity island effector protein(sseF)	S. Typhi str. CT18			GO:0016021~integral component of membrane,			sty05132:Salmonella infection,			Complete proteome,Membrane,Transmembrane,Transmembrane helix,			3	780	0.00384615
STM14_2829	GJ0703GL001660	STY2522	transcriptional regulator(STY2522)	S. Typhi str. CT18	Transcription,	GO:0006351~transcription, DNA-templated,GO:0006355~regulation of transcription, DNA-templated,		GO:0003677~DNA binding,	IPR005471:Transcription regulator IclR, N-terminal,IPR011991:Winged helix-turn-helix DNA-binding domain,IPR014757:Transcription regulator IclR, C-terminal,			SM00346:HTH_ICLR,	Complete proteome,DNA-binding,Transcription,Transcription regulation,	Transcription		3	780	0.00384615
STM14_1332	GJ0703GL002840	STY1201	dihydroorotase(STY1201)	S. Typhi str. CT18	Nucleotide transport and metabolism,	GO:0019856~pyrimidine nucleobase biosynthetic process,GO:0044205~'de novo' UMP biosynthetic process,		GO:0004151~dihydroorotase activity,GO:0008270~zinc ion binding,	IPR002195:Dihydroorotase, conserved site,IPR004721:Dihydroorotase homodimeric type,IPR006680:Amidohydrolase 1,	sty00240:Pyrimidine metabolism,sty01100:Metabolic pathways,	PIRSF001237:dihydroorotase,		Complete proteome,Hydrolase,Metal-binding,Pyrimidine biosynthesis,Zinc,		chain:Dihydroorotase,metal ion-binding site:Zinc 1,metal ion-binding site:Zinc 1; via carbamate group,metal ion-binding site:Zinc 2,metal ion-binding site:Zinc 2; via carbamate group,modified residue,sequence conflict,	4	1044	0.00383142
STM14_3375	GJ0703GL001172	STY2918	hypothetical protein(STY2918)	S. Typhi str. CT18			GO:0016021~integral component of membrane,		IPR001763:Rhodanese-like domain,IPR021309:Protein of unknown function DUF2892,			SM00450:RHOD,	Complete proteome,Membrane,Transmembrane,Transmembrane helix,	Inorganic ion transport and metabolism		2	525	0.00380952
STM14_4782	GJ0703GL004679	STY3583	deoxyribonuclease(tatD)	S. Typhi str. CT18			GO:0005737~cytoplasm,	GO:0000175~3'-5'-exoribonuclease activity,GO:0000287~magnesium ion binding,GO:0008310~single-stranded DNA 3'-5' exodeoxyribonuclease activity,GO:0016888~endodeoxyribonuclease activity, producing 5'-phosphomonoesters,	IPR001130:TatD family,IPR018228:Deoxyribonuclease, TatD-related, conserved site,IPR024918:Tat-linked quality control protein TatD,		PIRSF005902:Mg-dependent DNase, TatD type,		Complete proteome,Cytoplasm,Exonuclease,Hydrolase,Magnesium,Metal-binding,Nuclease,	DNA replication, recombination, and repair		3	792	0.00378788
STM14_1984	GJ0703GL002346	STY1429	hypothetical protein(STY1429)	S. Typhi str. CT18					IPR003848:Domain of unknown function DUF218,IPR014729:Rossmann-like alpha/beta/alpha sandwich fold,				Complete proteome,	Function unknown		3	798	0.0037594
STM14_4264	GJ0703GL000380	STY4270	low-affinity gluconate transporter(STY4270)	S. Typhi str. CT18			GO:0016021~integral component of membrane,	GO:0015128~gluconate transmembrane transporter activity,	IPR003474:Gluconate transporter,		PIRSF002746:gluconate transporter,		Complete proteome,Membrane,Transmembrane,Transmembrane helix,	Carbohydrate transport and metabolism / Amino acid transport and metabolism	signal peptide,	5	1338	0.00373692
STM14_3101	GJ0703GL001373	STY2773	anaerobic reductase protein(STY2773)	S. Typhi str. CT18		GO:0019645~anaerobic electron transport chain,	GO:0016021~integral component of membrane,		IPR007059:DMSO reductase anchor subunit (DmsC),	sty00920:Sulfur metabolism,			Complete proteome,Membrane,Transmembrane,Transmembrane helix,	General function prediction only		3	807	0.00371747
STM14_1531	GJ0703GL002731	STY1852	chorismate mutase(aroQ)	S. Typhi str. CT18		GO:0046417~chorismate metabolic process,		GO:0004106~chorismate mutase activity,	IPR002701:Chorismate mutase,IPR008240:Chorismate mutase, periplasmic,IPR020822:Chorismate mutase, type II,	sty00400:Phenylalanine, tyrosine and tryptophan biosynthesis,sty01100:Metabolic pathways,sty01110:Biosynthesis of secondary metabolites,sty01130:Biosynthesis of antibiotics,sty01230:Biosynthesis of amino acids,	PIRSF026640:periplasmic chorismate mutase,	SM00830:SM00830,	Complete proteome,Isomerase,Signal,	Amino acid transport and metabolism		2	543	0.00368324
STM14_1382	GJ0703GL002793	STY1248	thiamine kinase(STY1248)	S. Typhi str. CT18		GO:0006772~thiamine metabolic process,GO:0009229~thiamine diphosphate biosynthetic process,		GO:0005524~ATP binding,GO:0019165~thiamine kinase activity,	IPR002575:Aminoglycoside phosphotransferase,IPR011009:Protein kinase-like domain,IPR014093:Thiamine kinase,	sty00730:Thiamine metabolism,sty01100:Metabolic pathways,			ATP-binding,Complete proteome,Kinase,Nucleotide-binding,Transferase,	Cell envelope biogenesis, outer membrane	chain:Thiamine kinase,	3	822	0.00364964
STM14_0073	GJ0703GL003905	STY0071	phosphoribosyl-dephospho-CoA transferase(citX2)	S. Typhi str. CT18		GO:0051191~prosthetic group biosynthetic process,			IPR005551:Apo-citrate lyase phosphoribosyl-dephospho-CoA transferase,	sty02020:Two-component system,			Complete proteome,	Coenzyme metabolism / Lipid metabolism		2	549	0.00364299
STM14_4631	GJ0703GL000002	STY3941	DNA polymerase III subunit beta(STY3941)	S. Typhi str. CT18		GO:0006260~DNA replication,	GO:0005737~cytoplasm,GO:0009360~DNA polymerase III complex,	GO:0003677~DNA binding,GO:0003887~DNA-directed DNA polymerase activity,GO:0008408~3'-5' exonuclease activity,	IPR001001:DNA polymerase III, beta chain,IPR022634:DNA polymerase III, beta chain, N-terminal,IPR022635:DNA polymerase III, beta chain, C-terminal,IPR022637:DNA polymerase III, beta chain, central,	sty00230:Purine metabolism,sty00240:Pyrimidine metabolism,sty01100:Metabolic pathways,sty03030:DNA replication,sty03430:Mismatch repair,sty03440:Homologous recombination,	PIRSF000804:DNA polymerase III, beta subunit,	SM00480:POL3Bc,	Complete proteome,Cytoplasm,DNA replication,DNA-directed DNA polymerase,Nucleotidyltransferase,Transferase,	DNA replication, recombination, and repair	chain:DNA polymerase III subunit beta,sequence conflict,	4	1098	0.00364299
STM14_5513	GJ0703GL003977	STY4940	fimbrial subunit(sthD)	S. Typhi str. CT18		GO:0007155~cell adhesion,	GO:0009289~pilus,		IPR000259:Fimbrial-type adhesion domain,IPR008966:Adhesion domain,				Complete proteome,Signal,	Cell motility and secretion / Intracellular trafficking and secretion	signal peptide,	2	555	0.0036036
STM14_0462	GJ0703GL003541	STY0424	hypothetical protein(STY0424)	S. Typhi str. CT18					IPR009664:Protein of unknown function DUF1255,IPR011051:RmlC-like cupin domain,IPR014710:RmlC-like jelly roll fold,				Complete proteome,	Function unknown	chain:UPF0345 protein yaiE,	1	282	0.0035461
STM14_1960	GJ0703GL002364	STY1443	hypothetical protein(STY1443)	S. Typhi str. CT18					IPR007372:Lipid/polyisoprenoid-binding, YceI-like,			SM00867:SM00867,	Complete proteome,Signal,	Function unknown		2	564	0.0035461
STM14_1609	GJ0703GL002670	STY1786	hypothetical protein(STY1786)	S. Typhi str. CT18				GO:0004521~endoribonuclease activity,	IPR020499:Uncharacterised protein family YdiZ,IPR022597:Protein of unknown function DUF2622,				Complete proteome,			1	288	0.00347222
STM14_3746	GJ0703GL000836	STY3255	hypothetical protein(STY3255)	S. Typhi str. CT18					IPR003746:Protein of unknown function DUF167,IPR005228:Conserved hypothetical protein CHP00251,			SM01152:SM01152,	Complete proteome,	Function unknown	chain:UPF0235 protein yggU,	1	288	0.00347222
STM14_5040	GJ0703GL004474	STY4410	23S rRNA pseudouridine synthase F(STY4410)	S. Typhi str. CT18		GO:0001522~pseudouridine synthesis,GO:0006364~rRNA processing,		GO:0003723~RNA binding,GO:0009982~pseudouridine synthase activity,	IPR000748:Pseudouridine synthase, RsuA/RluB/E/F,IPR002942:RNA-binding S4 domain,IPR006145:Pseudouridine synthase, RsuA/RluB/C/D/E/F,IPR018496:Pseudouridine synthase, RsuA/RluB/E/F, conserved site,IPR020103:Pseudouridine synthase, catalytic domain,			SM00363:S4,	Complete proteome,Isomerase,RNA-binding,rRNA processing,	Translation, ribosomal structure and biogenesis	chain:Ribosomal large subunit pseudouridine synthase F,domain:S4 RNA-binding,	3	867	0.00346021
STM14_2279	GJ0703GL002081	STY2080	cation transporter(STY2080)	S. Typhi str. CT18			GO:0016021~integral component of membrane,		IPR008457:Copper resistance D,				Complete proteome,Membrane,Transmembrane,Transmembrane helix,	Inorganic ion transport and metabolism		3	873	0.00343643
STM14_0913	GJ0703GL003151	STY0820	imidazolonepropionase(hutI)	S. Typhi str. CT18	Secondary metabolites biosynthesis, transport, and catabolism,	GO:0019556~histidine catabolic process to glutamate and formamide,GO:0019557~histidine catabolic process to glutamate and formate,	GO:0005737~cytoplasm,	GO:0005506~iron ion binding,GO:0008270~zinc ion binding,GO:0050480~imidazolonepropionase activity,	IPR005920:Imidazolonepropionase,IPR006680:Amidohydrolase 1,IPR011059:Metal-dependent hydrolase, composite domain,	sty00340:Histidine metabolism,sty01100:Metabolic pathways,			Complete proteome,Cytoplasm,Histidine metabolism,Hydrolase,Iron,Metal-binding,Zinc,	Secondary metabolites biosynthesis, transport, and catabolism	binding site:Substrate,chain:Imidazolonepropionase,metal ion-binding site:Zinc or iron,	4	1167	0.00342759
STM14_4500	GJ0703GL000109	STY4057	beta-lactamase(STY4057)	S. Typhi str. CT18					IPR001279:Beta-lactamase-like,	sty01501:beta-Lactam resistance,		SM00849:SM00849,	Complete proteome,	General function prediction only		3	879	0.00341297
STM14_0782	GJ0703GL003246	STY0717	2-octaprenyl-3-methyl-6-methoxy-1,4-benzoquinol hydroxylase(yleB)	S. Typhi str. CT18		GO:0006744~ubiquinone biosynthetic process,		GO:0016709~oxidoreductase activity, acting on paired donors, with incorporation or reduction of molecular oxygen, NAD(P)H as one donor, and incorporation of one atom of oxygen,GO:0071949~FAD binding,	IPR002938:Monooxygenase, FAD-binding,IPR010971:Ubiquinone biosynthesis hydroxylase, UbiH/UbiF/VisC/COQ6,IPR018168:Ubiquinone biosynthesis hydroxylase, UbiH/UbiF/VisC/COQ6, conserved site,IPR023753:Pyridine nucleotide-disulphide oxidoreductase, FAD/NAD(P)-binding domain,	sty00130:Ubiquinone and other terpenoid-quinone biosynthesis,sty01100:Metabolic pathways,sty01110:Biosynthesis of secondary metabolites,			Complete proteome,Monooxygenase,Oxidoreductase,	Coenzyme metabolism / Energy production and conversion		4	1173	0.00341006
STM14_3481	GJ0703GL001086	STY3005	pathogenicity island 1 effector protein(sipA)	S. Typhi str. CT18		GO:0009405~pathogenesis,	GO:0005576~extracellular region,		IPR015138:Salmonella invasion protein A,IPR023224:Salmonella invasion protein A, C-terminal actin-binding domain,IPR023225:Salmonella invasion protein A, chaperone-binding,	sty05100:Bacterial invasion of epithelial cells,sty05132:Salmonella infection,			Actin-binding,Complete proteome,Secreted,Virulence,		chain:Cell invasion protein sipA,helix,region of interest:Actin-binding and polymerization,sequence conflict,strand,turn,	7	2055	0.00340633
STM14_0512	GJ0703GL003496	STY0472	4-methyl-5(b-hydroxyethyl)-thiazole monophosphate biosynthesis protein ThiJ(STY0472)	S. Typhi str. CT18					IPR002818:ThiJ/PfpI,IPR006287:DJ-1,				Complete proteome,	General function prediction only	chain:Protein thiJ,modified residue,	2	588	0.00340136
STM14_5422	GJ0703GL004105	STY4872	hypothetical protein(STY4872)	S. Typhi str. CT18			GO:0016021~integral component of membrane,		IPR010645:Domain of unknown function DUF1228,IPR020846:Major facilitator superfamily domain,				Complete proteome,Membrane,Transmembrane,Transmembrane helix,			4	1182	0.00338409
STM14_0082	GJ0703GL003897	STY0079	carnitine operon protein CaiE(STY0079)	S. Typhi str. CT18		GO:0009437~carnitine metabolic process,		GO:0016740~transferase activity,	IPR001451:Bacterial transferase hexapeptide repeat,IPR011004:Trimeric LpxA-like,IPR023446:Carnitine operon protein CaiE,				Complete proteome,Repeat,Transferase,	General function prediction only	chain:Carnitine operon protein caiE,sequence conflict,	2	594	0.003367
STM14_0644	GJ0703GL003371	STY0600	fimbriae w protein(fimW)	S. Typhi str. CT18		GO:0006351~transcription, DNA-templated,GO:0006355~regulation of transcription, DNA-templated,		GO:0003677~DNA binding,	IPR000792:Transcription regulator LuxR, C-terminal,IPR011991:Winged helix-turn-helix DNA-binding domain,IPR016032:Signal transduction response regulator, C-terminal effector,			SM00421:HTH_LUXR,	Complete proteome,DNA-binding,Transcription,Transcription regulation,	Transcription	chain:Fimbriae W protein,domain:HTH luxR-type,	2	594	0.003367
STM14_2025	GJ0703GL002297	STY1386	transcriptional regulator(STY1386)	S. Typhi str. CT18	Transcription,	GO:0006351~transcription, DNA-templated,		GO:0003677~DNA binding,GO:0003700~transcription factor activity, sequence-specific DNA binding,	IPR000847:Transcription regulator HTH, LysR,IPR005119:LysR, substrate-binding,IPR011991:Winged helix-turn-helix DNA-binding domain,				Complete proteome,DNA-binding,Transcription,Transcription regulation,	Transcription		3	903	0.00332226
STM14_3269	GJ0703GL001287	STY2855	hypothetical protein(STY2855)	S. Typhi str. CT18					IPR005511:Senescence marker protein-30 (SMP-30),IPR011042:Six-bladed beta-propeller, TolB-like,IPR013658:SMP-30/Gluconolaconase/LRE-like region,				Complete proteome,	Carbohydrate transport and metabolism		3	906	0.00331126
STM14_2176	GJ0703GL002161	STY1928	L,D-carboxypeptidase A(STY1928)	S. Typhi str. CT18				GO:0004180~carboxypeptidase activity,	IPR003507:Muramoyl-tetrapeptide carboxypeptidase,IPR027461:LD-carboxypeptidase A, C-terminal domain,IPR027478:Murein tetrapeptide carboxypeptidase, N-terminal domain,		PIRSF028757:murein tetrapeptide carboxypeptidase,		Carboxypeptidase,Complete proteome,Hydrolase,Protease,	Defense mechanisms		3	912	0.00328947
STM14_1930	GJ0703GL002394	STY1470	virulence effector protein(srfC)	S. Typhi str. CT18	Function unknown,				IPR017030:Virulence effector, SrfC,				Complete proteome,	Function unknown		7	2142	0.00326797
STM14_3787	GJ0703GL000793	STY3302	polysaccharide deacetylase(STY3302)	S. Typhi str. CT18		GO:0045493~xylan catabolic process,		GO:0016798~hydrolase activity, acting on glycosyl bonds,GO:0016810~hydrolase activity, acting on carbon-nitrogen (but not peptide) bonds,	IPR002509:Polysaccharide deacetylase,IPR011330:Glycoside hydrolase/deacetylase, beta/alpha-barrel,				Carbohydrate metabolism,Complete proteome,Glycosidase,Hydrolase,Polysaccharide degradation,Xylan degradation,	Carbohydrate transport and metabolism		3	921	0.00325733
STM14_4878	GJ0703GL004596	STY3816	manganese superoxide dismutase(STY3816)	S. Typhi str. CT18				GO:0004784~superoxide dismutase activity,GO:0046872~metal ion binding,	IPR001189:Manganese/iron superoxide dismutase,IPR019831:Manganese/iron superoxide dismutase, N-terminal,IPR019832:Manganese/iron superoxide dismutase, C-terminal,IPR019833:Manganese/iron superoxide dismutase, binding site,		PIRSF000349:superoxide dismutase, Mn/Fe specific,		Complete proteome,Manganese,Metal-binding,Oxidoreductase,	Inorganic ion transport and metabolism	chain:Superoxide dismutase [Mn],metal ion-binding site:Manganese,sequence conflict,	2	618	0.00323625
STM14_2388	GJ0703GL001991	STY2176	flagellar hook-basal body complex protein FliE(STY2176)	S. Typhi str. CT18		GO:0071973~bacterial-type flagellum-dependent cell motility,	GO:0009425~bacterial-type flagellum basal body,	GO:0003774~motor activity,GO:0005198~structural molecule activity,	IPR001624:Flagellar hook-basal body complex protein FliE,	sty02040:Flagellar assembly,			Bacterial flagellum,Complete proteome,	Cell motility and secretion / Intracellular trafficking and secretion	chain:Flagellar hook-basal body complex protein fliE,	1	312	0.00320513
STM14_2036	GJ0703GL002280	STY1375	phage shock protein E(STY1375)	S. Typhi str. CT18				GO:0016740~transferase activity,	IPR001763:Rhodanese-like domain,IPR014323:Phage shock protein, PspE,			SM00450:RHOD,	Complete proteome,Signal,Transferase,	Inorganic ion transport and metabolism	signal peptide,	1	312	0.00320513
STM14_4927	GJ0703GL004549	STY3770	repressor of the methionine regulon(STY3770)	S. Typhi str. CT18		GO:0006351~transcription, DNA-templated,GO:0009086~methionine biosynthetic process,GO:0045892~negative regulation of transcription, DNA-templated,	GO:0005737~cytoplasm,	GO:0003677~DNA binding,GO:0003700~transcription factor activity, sequence-specific DNA binding,	IPR002084:Methionine repressor MetJ,IPR010985:Ribbon-helix-helix,IPR023453:Methionine repressor MetJ domain,				Amino-acid biosynthesis,Complete proteome,Cytoplasm,DNA-binding,Methionine biosynthesis,Repressor,Transcription,Transcription regulation,	Transcription / Amino acid transport and metabolism	chain:Met repressor,	1	315	0.0031746
STM14_1343	GJ0703GL002829	STY1212	flagellar basal body P-ring protein FlgA(STY1212)	S. Typhi str. CT18		GO:0044781~bacterial-type flagellum organization,	GO:0031514~motile cilium,GO:0042597~periplasmic space,		IPR013974:SAF domain,IPR017585:Flagella basal body P-ring formation protein FlgA, C-terminal,	sty02040:Flagellar assembly,		SM00858:SM00858,	Bacterial flagellum biogenesis,Cell projection,Cilium,Complete proteome,Flagellum,Periplasm,Signal,	Cell motility and secretion / Posttranslational modification, protein turnover, chaperones	chain:Flagella basal body P-ring formation protein flgA,signal peptide,	2	630	0.0031746
STM14_0177	GJ0703GL003812	STY0170	glycosyl hydrolase(STY0170)	S. Typhi str. CT18		GO:0005975~carbohydrate metabolic process,		GO:0004553~hydrolase activity, hydrolyzing O-glycosyl compounds,	IPR006710:Glycoside hydrolase, family 43,IPR016828:Alpha-L-arabinofuranosidase,IPR023296:Glycosyl hydrolase, five-bladed beta-propellor domain,		PIRSF025414:alpha-L-arabinofuranosidase,		Complete proteome,Glycosidase,Hydrolase,	General function prediction only		3	948	0.00316456
STM14_1387	GJ0703GL002788	STY1253	TetR family trancriptional regulator(STY1253)	S. Typhi str. CT18	Transcription,	GO:0006351~transcription, DNA-templated,GO:0006355~regulation of transcription, DNA-templated,		GO:0003677~DNA binding,	IPR001647:DNA-binding HTH domain, TetR-type,IPR009057:Homeodomain-like,IPR011075:Tetracycline transcriptional regulator, TetR-related, C-terminal,IPR015893:Tetracycline transcriptional regulator, TetR-like, C-terminal,				Complete proteome,DNA-binding,Transcription,Transcription regulation,	Transcription		2	633	0.00315956
STM14_4473	GJ0703GL000137	STY4083	ADP-heptose--LPS heptosyltransferase(waaC)	S. Typhi str. CT18		GO:0009244~lipopolysaccharide core region biosynthetic process,		GO:0008920~lipopolysaccharide heptosyltransferase activity,	IPR002201:Glycosyl transferase, family 9,IPR011908:Lipopolysaccharide heptosyltransferase I,	sty00540:Lipopolysaccharide biosynthesis,sty01100:Metabolic pathways,			Complete proteome,Transferase,	Cell envelope biogenesis, outer membrane		3	951	0.00315457
STM14_1537	GJ0703GL002727	STY1848	hypothetical protein(STY1848)	S. Typhi str. CT18			GO:0016021~integral component of membrane,						Complete proteome,Membrane,Transmembrane,Transmembrane helix,			2	639	0.00312989
STM14_0241	GJ0703GL003739	STY0223	glutamate-1-semialdehyde 2,1-aminomutase(STY0223)	S. Typhi str. CT18		GO:0006782~protoporphyrinogen IX biosynthetic process,	GO:0005737~cytoplasm,	GO:0008483~transaminase activity,GO:0030170~pyridoxal phosphate binding,GO:0042286~glutamate-1-semialdehyde 2,1-aminomutase activity,	IPR004639:Tetrapyrrole biosynthesis, glutamate-1-semialdehyde aminotransferase,IPR005814:Aminotransferase class-III,IPR015421:Pyridoxal phosphate-dependent transferase, major region, subdomain 1,IPR015422:Pyridoxal phosphate-dependent transferase, major region, subdomain 2,IPR015424:Pyridoxal phosphate-dependent transferase,	sty00860:Porphyrin and chlorophyll metabolism,sty01100:Metabolic pathways,sty01110:Biosynthesis of secondary metabolites,			Complete proteome,Cytoplasm,Isomerase,Porphyrin biosynthesis,Pyridoxal phosphate,	Coenzyme metabolism	chain:Glutamate-1-semialdehyde 2,1-aminomutase,modified residue,	4	1278	0.00312989
STM14_4466	GJ0703GL000143	STY4089	polysaccharide deacetylase(STY4089)	S. Typhi str. CT18		GO:0005975~carbohydrate metabolic process,		GO:0016810~hydrolase activity, acting on carbon-nitrogen (but not peptide) bonds,	IPR002509:Polysaccharide deacetylase,IPR006837:Protein of unknown function DUF610, YibQ,IPR011330:Glycoside hydrolase/deacetylase, beta/alpha-barrel,				Complete proteome,Signal,	Function unknown		3	960	0.003125
STM14_1051	GJ0703GL003038	STY0932	NADH oxidoreductase Hcr(hcr)	S. Typhi str. CT18		GO:0006810~transport,		GO:0009055~electron carrier activity,GO:0016491~oxidoreductase activity,GO:0046872~metal ion binding,GO:0051537~2 iron, 2 sulfur cluster binding,	IPR000951:Phthalate dioxygenase reductase,IPR001041:2Fe-2S ferredoxin-type domain,IPR001433:Oxidoreductase FAD/NAD(P)-binding,IPR008333:Oxidoreductase, FAD-binding domain,IPR012675:Beta-grasp domain,IPR017927:Ferredoxin reductase-type FAD-binding domain,IPR017938:Riboflavin synthase-like beta-barrel,				2Fe-2S,Complete proteome,FAD,Flavoprotein,Iron,Iron-sulfur,Metal-binding,Oxidoreductase,Transport,	Energy production and conversion		3	966	0.00310559
STM14_1586	GJ0703GL002689	STY1807	succinylglutamate desuccinylase(astE)	S. Typhi str. CT18		GO:0019544~arginine catabolic process to glutamate,GO:0019545~arginine catabolic process to succinate,		GO:0008270~zinc ion binding,GO:0009017~succinylglutamate desuccinylase activity,GO:0016788~hydrolase activity, acting on ester bonds,	IPR007036:Succinylglutamate desuccinylase/aspartoacylase,IPR016681:Succinylglutamate desuccinylase,	sty00330:Arginine and proline metabolism,sty01100:Metabolic pathways,	PIRSF017020:succinylglutamate desuccinylase,		Arginine metabolism,Complete proteome,Hydrolase,Metal-binding,Zinc,	Amino acid transport and metabolism	chain:Succinylglutamate desuccinylase,metal ion-binding site:Zinc,	3	966	0.00310559
STM14_1705	GJ0703GL002589	STY1711	pathogenicity island lipoprotein(ssaJ)	S. Typhi str. CT18		GO:0009306~protein secretion,	GO:0016021~integral component of membrane,		IPR003282:Type III secretion system lipoprotein HrcJ/YscJ,IPR006182:Secretory protein YscJ/FliF,	sty03070:Bacterial secretion system,			Complete proteome,Lipoprotein,Membrane,Transmembrane,Transmembrane helix,	Intracellular trafficking and secretion	chain:Secretion system apparatus lipoprotein ssaJ,lipid moiety-binding region:N-palmitoyl cysteine,lipid moiety-binding region:S-diacylglycerol cysteine,signal peptide,transmembrane region,	2	645	0.00310078
STM14_2318	GJ0703GL002049	STY2114	tRNA (mo5U34)-methyltransferase(STY2114)	S. Typhi str. CT18		GO:0002098~tRNA wobble uridine modification,		GO:0016765~transferase activity, transferring alkyl or aryl (other than methyl) groups,	IPR010017:tRNA (mo5U34)-methyltransferase,IPR027555:tRNA (mo5U34)-methyltransferase-like,				Complete proteome,Transferase,tRNA processing,	Coenzyme metabolism	chain:tRNA (mo5U34)-methyltransferase,	3	969	0.00309598
STM14_4904	GJ0703GL004571	STY3791	autoinducer-2 (AI-2) modifying protein LsrG(STY3791)	S. Typhi str. CT18			GO:0005737~cytoplasm,	GO:0016861~intramolecular oxidoreductase activity, interconverting aldoses and ketoses,	IPR007138:Antibiotic biosynthesis monooxygenase,IPR011008:Dimeric alpha-beta barrel,				Complete proteome,Cytoplasm,Isomerase,	Function unknown		1	327	0.0030581
STM14_1414	GJ0703GL002763	STY1276	hypothetical protein(STY1276)	S. Typhi str. CT18					IPR009739:Protein of unknown function DUF1311,IPR017160:Uncharacterised conserved protein UCP037256,		PIRSF037256:uncharacterized conserved protein,		Complete proteome,Signal,	Function unknown		1	327	0.0030581
STM14_2926	GJ0703GL001572	STY2608	hypothetical protein(STY2608)	S. Typhi str. CT18			GO:0016021~integral component of membrane,		IPR003675:CAAX amino terminal protease,				Complete proteome,Membrane,Transmembrane,Transmembrane helix,			2	654	0.0030581
STM14_0803	GJ0703GL003236	STY0726	lipoprotein(STY0726)	S. Typhi str. CT18					IPR025727:YbfN-like lipoprotein,				Complete proteome,Lipoprotein,Signal,			1	330	0.0030303
STM14_4432	GJ0703GL000176	STY4121	hexulose-6-phosphate synthase(STY4121)	S. Typhi str. CT18		GO:0006207~'de novo' pyrimidine nucleobase biosynthetic process,		GO:0004590~orotidine-5'-phosphate decarboxylase activity,	IPR001754:Orotidine 5'-phosphate decarboxylase domain,IPR011060:Ribulose-phosphate binding barrel,IPR013785:Aldolase-type TIM barrel,	sty00040:Pentose and glucuronate interconversions,		SM00934:SM00934,	Complete proteome,Lyase,	Carbohydrate transport and metabolism		2	660	0.0030303
STM14_3491	GJ0703GL001076	STY3015	surface presentation of antigens protein(spaN)	S. Typhi str. CT18					IPR003066:Salmonella invasion protein InvJ,		PIRSF020738:injectisome accessory protein, InvJ type,		Complete proteome,			3	1008	0.00297619
STM14_1237	GJ0703GL002914	STY1121	cell invasion protein(sigD)	S. Typhi str. CT18		GO:0009405~pathogenesis,	GO:0005576~extracellular region,	GO:0016791~phosphatase activity,	IPR008108:Phosphatase IpgD/SopB,	sty05100:Bacterial invasion of epithelial cells,sty05132:Salmonella infection,			Complete proteome,Hydrolase,Secreted,Virulence,		chain:Inositol phosphate phosphatase sopB,sequence conflict,short sequence motif:CX5R motif,	5	1683	0.00297089
STM14_0590	GJ0703GL003422	STY0548	ABC transporter ATP-binding protein(STY0548)	S. Typhi str. CT18				GO:0005524~ATP binding,GO:0016887~ATPase activity,	IPR003439:ABC transporter-like,IPR003593:AAA+ ATPase domain,IPR017871:ABC transporter, conserved site,IPR027417:P-loop containing nucleoside triphosphate hydrolase,			SM00382:AAA,	ATP-binding,Complete proteome,Nucleotide-binding,	General function prediction only		2	675	0.00296296
STM14_3715	GJ0703GL000873	STY3232	ABC transporter ATP-binding protein(STY3232)	S. Typhi str. CT18	Inorganic ion transport and metabolism,			GO:0005524~ATP binding,GO:0016887~ATPase activity,	IPR003439:ABC transporter-like,IPR003593:AAA+ ATPase domain,IPR027417:P-loop containing nucleoside triphosphate hydrolase,	sty02010:ABC transporters,		SM00382:AAA,	ATP-binding,Complete proteome,Nucleotide-binding,	Inorganic ion transport and metabolism		2	675	0.00296296
STM14_4195	GJ0703GL000437	STY4313	ribulose-phosphate 3-epimerase(rpe)	S. Typhi str. CT18		GO:0005975~carbohydrate metabolic process,GO:0006098~pentose-phosphate shunt,		GO:0004750~ribulose-phosphate 3-epimerase activity,GO:0046872~metal ion binding,	IPR000056:Ribulose-phosphate 3-epimerase-like,IPR011060:Ribulose-phosphate binding barrel,IPR013785:Aldolase-type TIM barrel,IPR026019:Ribulose-phosphate 3-epimerase,	sty00030:Pentose phosphate pathway,sty00040:Pentose and glucuronate interconversions,sty01100:Metabolic pathways,sty01110:Biosynthesis of secondary metabolites,sty01120:Microbial metabolism in diverse environments,sty01130:Biosynthesis of antibiotics,sty01200:Carbon metabolism,sty01230:Biosynthesis of amino acids,	PIRSF001461:ribulose-phosphate 3-epimerase,		Carbohydrate metabolism,Cobalt,Complete proteome,Isomerase,Manganese,Metal-binding,Zinc,	Carbohydrate transport and metabolism	chain:Putative epimerase lsrE,transmembrane region,	2	675	0.00296296
STM14_2542	GJ0703GL001898	STY2258	ferredoxin(pduS)	S. Typhi str. CT18				GO:0046872~metal ion binding,GO:0051539~4 iron, 4 sulfur cluster binding,	IPR009051:Alpha-helical ferredoxin,IPR011538:NADH:ubiquinone oxidoreductase, 51kDa subunit,IPR017054:Propanediol utilization protein, PduS, predicted,IPR017896:4Fe-4S ferredoxin-type, iron-sulpur binding domain,IPR019554:Soluble ligand binding domain,IPR026902:RnfC Barrel sandwich hybrid domain,		PIRSF036408:propanediol utilization protein, PduS type,		4Fe-4S,Complete proteome,Iron,Iron-sulfur,Metal-binding,	Energy production and conversion		4	1353	0.00295639
STM14_0678	GJ0703GL003339	STY0624	transcriptional activator RamA(ramA)	S. Typhi str. CT18		GO:0006351~transcription, DNA-templated,		GO:0003700~transcription factor activity, sequence-specific DNA binding,GO:0043565~sequence-specific DNA binding,	IPR009057:Homeodomain-like,IPR018060:DNA binding HTH domain, AraC-type,IPR018062:HTH domain AraC-type, conserved site,IPR020449:Transcription regulator HTH, AraC- type,			SM00342:HTH_ARAC,	Complete proteome,DNA-binding,Transcription,Transcription regulation,	Transcription		1	339	0.00294985
STM14_1372	GJ0703GL002803	STY1238	hypothetical protein(STY1238)	S. Typhi str. CT18	Coenzyme transport and metabolism,	GO:0051301~cell division,		GO:0003676~nucleic acid binding,	IPR003770:Uncharacterised protein family UPF0755, YceG-like,IPR013087:Zinc finger C2H2-type/integrase DNA-binding domain,				Cell cycle,Cell division,Complete proteome,	General function prediction only		3	1020	0.00294118
STM14_3775	GJ0703GL000804	STY3293	LysR-family transcriptional regulator(STY3293)	S. Typhi str. CT18		GO:0006351~transcription, DNA-templated,GO:0006355~regulation of transcription, DNA-templated,		GO:0003677~DNA binding,	IPR000792:Transcription regulator LuxR, C-terminal,IPR011991:Winged helix-turn-helix DNA-binding domain,IPR016032:Signal transduction response regulator, C-terminal effector,			SM00421:HTH_LUXR,	Complete proteome,DNA-binding,Transcription,Transcription regulation,	Signal transduction mechanisms / Transcription		2	681	0.00293686
STM14_2654	GJ0703GL001788	STY2380	fimbrial chaperone protein(stcB)	S. Typhi str. CT18	Cell motility and secretion / Intracellular trafficking and secretion,	GO:0043711~pilus organization,GO:0061077~chaperone-mediated protein folding,GO:0071555~cell wall organization,	GO:0030288~outer membrane-bounded periplasmic space,		IPR001829:Pili assembly chaperone, bacterial,IPR008962:PapD-like,IPR016147:Pili assembly chaperone, N-terminal, bacterial,IPR016148:Pili assembly chaperone, C-terminal domain,IPR018046:Pili assembly chaperone, conserved site,				Chaperone,Complete proteome,	Cell motility and secretion / Intracellular trafficking and secretion		2	681	0.00293686
STM14_4538	GJ0703GL000078	STY4022	magnesium transport protein MgtC(mgtC)	S. Typhi str. CT18		GO:0009405~pathogenesis,	GO:0005886~plasma membrane,GO:0016021~integral component of membrane,		IPR003416:MgtC/SapB/SrpB transporter,				Cell inner membrane,Cell membrane,Complete proteome,Membrane,Transmembrane,Transmembrane helix,Virulence,	Function unknown	chain:Protein mgtC,transmembrane region,	2	681	0.00293686
STM14_2843	GJ0703GL001647	STY2535	2-succinylbenzoate-CoA ligase(menE)	S. Typhi str. CT18		GO:0009234~menaquinone biosynthetic process,		GO:0005524~ATP binding,GO:0008756~o-succinylbenzoate-CoA ligase activity,	IPR000873:AMP-dependent synthetase/ligase,IPR010192:O-succinylbenzoate-CoA ligase,IPR020845:AMP-binding, conserved site,IPR025110:Domain of unknown function DUF4009,	sty00130:Ubiquinone and other terpenoid-quinone biosynthesis,sty01100:Metabolic pathways,sty01110:Biosynthesis of secondary metabolites,			ATP-binding,Complete proteome,Ligase,Menaquinone biosynthesis,Nucleotide-binding,	Lipid metabolism / Secondary metabolites biosynthesis, transport, and catabolism	chain:2-succinylbenzoate--CoA ligase,	4	1365	0.0029304
STM14_3456	GJ0703GL001108	STY2982	hypothetical protein(STY2982)	S. Typhi str. CT18					IPR020483:Uncharacterised protein family YgbA,				Complete proteome,			1	342	0.00292398
STM14_5298	GJ0703GL004248	STY4770	hypothetical protein(ytfP)	S. Typhi str. CT18				GO:0016740~transferase activity,	IPR009288:AIG2-like,IPR013024:Butirosin biosynthesis, BtrG-like,				Complete proteome,Transferase,	Function unknown		1	342	0.00292398
STM14_4508	GJ0703GL000102	STY4049	tRNA (guanosine-2'-O)-methyltransferase(trmH)	S. Typhi str. CT18		GO:0002938~tRNA guanine ribose methylation,		GO:0000049~tRNA binding,GO:0009020~tRNA (guanosine-2'-O-)-methyltransferase activity,	IPR001537:tRNA/rRNA methyltransferase, SpoU,IPR022724:RNA methyltransferase, SpoU/TrmH type, C-terminal,				Complete proteome,Methyltransferase,RNA-binding,S-adenosyl-L-methionine,Transferase,tRNA processing,tRNA-binding,	Translation, ribosomal structure and biogenesis		2	687	0.00291121
STM14_0266	GJ0703GL003715	STY0247	outer membrane protein(yaeT)	S. Typhi str. CT18		GO:0043165~Gram-negative-bacterium-type cell outer membrane assembly,GO:0051205~protein insertion into membrane,	GO:0009279~cell outer membrane,GO:0016021~integral component of membrane,		IPR000184:Bacterial surface antigen (D15),IPR010827:Surface antigen variable number,IPR023707:Outer membrane protein assembly factor BamA,		PIRSF006076:outer membrane assembly protein, OMP85 type,		Cell outer membrane,Complete proteome,Membrane,Repeat,Signal,Transmembrane,Transmembrane beta strand,		chain:Outer membrane protein assembly factor yaeT,signal peptide,	7	2409	0.00290577
STM14_5012	GJ0703GL004494	STY3714	hypothetical protein(STY3714)	S. Typhi str. CT18					IPR010858:Protein of unknown function DUF1481,IPR012640:Membrane lipoprotein, lipid attachment site,IPR016500:Uncharacterised conserved protein UCP006993,		PIRSF006993:uncharacterized conserved protein,		Complete proteome,Signal,		signal peptide,	2	690	0.00289855
STM14_4231	GJ0703GL000406	STY4283	4-alpha-glucanotransferase(malQ)	S. Typhi str. CT18				GO:0004134~4-alpha-glucanotransferase activity,	IPR003385:Glycoside hydrolase, family 77,IPR013781:Glycoside hydrolase, catalytic domain,IPR017853:Glycoside hydrolase, superfamily,	sty00500:Starch and sucrose metabolism,sty01100:Metabolic pathways,			Carbohydrate metabolism,Complete proteome,Glycosyltransferase,Transferase,	Carbohydrate transport and metabolism	signal peptide,	6	2076	0.00289017
STM14_2533	GJ0703GL001907	STY2249	propanediol dehydratase reactivation protein PduH(pduH)	S. Typhi str. CT18					IPR003208:Diol/glycerol dehydratase/dehydratase reactivating factor,IPR009192:Diol/glycerol dehydratase reactivating factor, small subunit,IPR010254:B12-dependent dehydratases, beta subunit,		PIRSF011503:diol/glycerol dehydratase reactivating factor, small subunit,		Complete proteome,			1	348	0.00287356
STM14_2286	GJ0703GL002074	STY2087	hypothetical protein(STY2087)	S. Typhi str. CT18			GO:0005576~extracellular region,		IPR020236:Uncharacterised protein family YebF,IPR025603:YebF/Colicin-M immunity protein,				Complete proteome,Secreted,Signal,		chain:Protein yebF,signal peptide,	1	351	0.002849
STM14_2795	GJ0703GL001686	STY2491	ADA regulatory protein(STY2491)	S. Typhi str. CT18	DNA replication, recombination, and repair,Nucleotide transport and metabolism,	GO:0006281~DNA repair,GO:0006351~transcription, DNA-templated,		GO:0003700~transcription factor activity, sequence-specific DNA binding,GO:0003908~methylated-DNA-[protein]-cysteine S-methyltransferase activity,GO:0008270~zinc ion binding,GO:0043565~sequence-specific DNA binding,	IPR001497:Methylated-DNA-[protein]-cysteine S-methyltransferase, active site,IPR004026:Ada DNA repair, metal-binding,IPR008332:Methylguanine DNA methyltransferase, ribonuclease-like,IPR009057:Homeodomain-like,IPR011991:Winged helix-turn-helix DNA-binding domain,IPR014048:Methylated-DNA-[protein]-cysteine S-methyltransferase, DNA binding,IPR016221:Bifunctional regulatory protein Ada,IPR018060:DNA …		PIRSF000409:bifunctional regulatory protein Ada,	SM00342:HTH_ARAC,	Complete proteome,DNA-binding,Metal-binding,Methyltransferase,Transcription,Transcription regulation,Transferase,Zinc,	Nucleotide transport and metabolism	active site:Nucleophile; methyl group acceptor,active site:Nucleophile; methyl group acceptor from phosphotriester,binding site:DNA,chain:Methylated-DNA--protein-cysteine methyltransferase,chain:Regulatory protein ada,DNA-binding region:H-T-H motif,metal ion-binding site:Zinc,site:Cleavage,	3	1056	0.00284091
STM14_3737	GJ0703GL000845	STY3246	endonuclease I(STY3246)	S. Typhi str. CT18				GO:0004519~endonuclease activity,	IPR007346:Endonuclease I,				Complete proteome,Endonuclease,Hydrolase,Nuclease,Signal,	DNA replication, recombination, and repair	signal peptide,	2	705	0.00283688
STM14_3045	GJ0703GL001423	STY2720	arsenate reductase family protein(STY2720)	S. Typhi str. CT18					IPR006504:Transcriptional regulator Spx/MgsR,IPR006660:Arsenate reductase-like,IPR012336:Thioredoxin-like fold,				Complete proteome,	Inorganic ion transport and metabolism		1	354	0.00282486
STM14_4337	GJ0703GL000252	STY4198	phage-like lysozyme(STY4198)	S. Typhi str. CT18				GO:0003796~lysozyme activity,	IPR023346:Lysozyme-like domain,IPR023347:Lysozyme domain,				Complete proteome,	General function prediction only		1	354	0.00282486
STM14_4154	GJ0703GL000468	STY4348	sulfur relay protein TusC(yheM)	S. Typhi str. CT18		GO:0008033~tRNA processing,	GO:0005737~cytoplasm,		IPR003787:Sulphur relay, DsrE/F-like protein,IPR017462:Sulphur relay, TusC/DsrF,IPR027396:DsrEFH-like,	sty04122:Sulfur relay system,			Complete proteome,Cytoplasm,tRNA processing,	Inorganic ion transport and metabolism	chain:Protein tusC,	1	354	0.00282486
STM14_3805	GJ0703GL000782	STY3312	hypothetical protein(STY3312)	S. Typhi str. CT18						sty02010:ABC transporters,			Complete proteome,	Inorganic ion transport and metabolism		2	711	0.00281294
STM14_3059	GJ0703GL001408	STY2736	arsenate reductase(STY2736)	S. Typhi str. CT18				GO:0008794~arsenate reductase (glutaredoxin) activity,	IPR006659:Arsenate reductase,IPR006660:Arsenate reductase-like,IPR012336:Thioredoxin-like fold,				Complete proteome,Oxidoreductase,	Inorganic ion transport and metabolism		1	357	0.00280112
STM14_5220	GJ0703GL004315	STY4700	fumarate reductase complex subunit D; membrane anchor polypeptide(frdD)	S. Typhi str. CT18		GO:0006106~fumarate metabolic process,	GO:0005886~plasma membrane,GO:0016021~integral component of membrane,		IPR003418:Fumarate reductase, D subunit,	sty00020:Citrate cycle (TCA cycle),sty00190:Oxidative phosphorylation,sty00620:Pyruvate metabolism,sty00650:Butanoate metabolism,sty01100:Metabolic pathways,sty01110:Biosynthesis of secondary metabolites,sty01120:Microbial metabolism in diverse environments,sty01130:Biosynthesis of antibiotics,sty01200:Carbon metabolism,sty02020:Two-component system,	PIRSF000179:fumarate reductase, subunit D (membrane anchor),		Cell inner membrane,Cell membrane,Complete proteome,Membrane,Transmembrane,Transmembrane helix,	Energy production and conversion	chain:Fumarate reductase subunit D,topological domain:Cytoplasmic,topological domain:Periplasmic,transmembrane region,	1	357	0.00280112
STM14_4963	GJ0703GL004527	STY3746	hypothetical protein(STY3746)	S. Typhi str. CT18			GO:0016021~integral component of membrane,		IPR009867:Protein of unknown function DUF1422,				Complete proteome,Membrane,Transmembrane,Transmembrane helix,		signal peptide,	1	357	0.00280112
STM14_2995	GJ0703GL001467	STY2675	amidotransferase(STY2675)	S. Typhi str. CT18	Nucleotide transport and metabolism,			GO:0016740~transferase activity,	IPR017926:Glutamine amidotransferase,	sty00230:Purine metabolism,sty01100:Metabolic pathways,			Complete proteome,Transferase,	Nucleotide transport and metabolism		2	717	0.0027894
STM14_0360	GJ0703GL003633	STY0351	outer membrane adhesin(STY0351)	S. Typhi str. CT18			GO:0016021~integral component of membrane,		IPR011250:Outer membrane protein/outer membrane enzyme PagP , beta-barrel,IPR027385:Outer membrane protein beta-barrel,				Complete proteome,Signal,	Cell envelope biogenesis, outer membrane		2	717	0.0027894
STM14_4892	GJ0703GL004582	STY3802	GntR family transcriptional regulator(STY3802)	S. Typhi str. CT18	Transcription,	GO:0006351~transcription, DNA-templated,		GO:0003677~DNA binding,GO:0003700~transcription factor activity, sequence-specific DNA binding,	IPR000524:Transcription regulator HTH, GntR,IPR011663:UbiC transcription regulator-associated,IPR011991:Winged helix-turn-helix DNA-binding domain,			SM00345:HTH_GNTR,SM00866:SM00866,	Complete proteome,DNA-binding,Transcription,Transcription regulation,			2	720	0.00277778
STM14_0625	GJ0703GL003389	STY0583	UDP-2,3-diacylglucosamine hydrolase(STY0583)	S. Typhi str. CT18	Function unknown,	GO:0009245~lipid A biosynthetic process,	GO:0005737~cytoplasm,	GO:0016462~pyrophosphatase activity,	IPR010138:UDP-2,3-diacylglucosamine hydrolase,IPR024654:Calcineurin-like phosphoesterase superfamily domain,	sty00540:Lipopolysaccharide biosynthesis,sty01100:Metabolic pathways,			Complete proteome,Cytoplasm,Hydrolase,Lipid A biosynthesis,Lipid biosynthesis,Lipid metabolism,	Function unknown	chain:UDP-2,3-diacylglucosamine hydrolase,	2	720	0.00277778
STM14_1663	GJ0703GL002628	STY1754	iron-sulfur cluster assembly scaffold protein(STY1754)	S. Typhi str. CT18		GO:0016226~iron-sulfur cluster assembly,		GO:0005198~structural molecule activity,GO:0051536~iron-sulfur cluster binding,	IPR000361:FeS cluster biogenesis,IPR011298:SUF system FeS cluster assembly, SufA scaffold,IPR016092:FeS cluster insertion protein,IPR017870:FeS cluster insertion, C-terminal, conserved site,				Complete proteome,	Function unknown		1	366	0.00273224
STM14_4736	GJ0703GL004720	STY3622	uroporphyrinogen III synthase(STY3622)	S. Typhi str. CT18		GO:0033014~tetrapyrrole biosynthetic process,		GO:0004852~uroporphyrinogen-III synthase activity,	IPR003754:Tetrapyrrole biosynthesis, uroporphyrinogen III synthase,	sty00860:Porphyrin and chlorophyll metabolism,sty01100:Metabolic pathways,sty01110:Biosynthesis of secondary metabolites,			Complete proteome,	Coenzyme metabolism	chain:Uroporphyrinogen-III synthase,	2	738	0.00271003
STM14_0455	GJ0703GL003548	STY0418	AdrA protein(adrA)	S. Typhi str. CT18			GO:0016021~integral component of membrane,		IPR000160:GGDEF domain,IPR007894:MASE2,			SM00267:DUF1,	Complete proteome,Membrane,Transmembrane,Transmembrane helix,	Signal transduction mechanisms		3	1110	0.0027027
STM14_3434	GJ0703GL001128	STY2964	hydrogenase maturation protein(hypf)	S. Typhi str. CT18	Posttranslational modification, protein turnover, chaperones,	GO:0046944~protein carbamoylation,		GO:0003725~double-stranded RNA binding,GO:0008270~zinc ion binding,GO:0016743~carboxyl- or carbamoyltransferase activity,	IPR001792:Acylphosphatase-like,IPR004421:Carbamoyltransferase, HypF-type,IPR006070:YrdC-like domain,IPR011125:Zinc finger, HypF-type,IPR017945:DHBP synthase RibB-like alpha/beta domain,IPR017968:Acylphosphatase, conserved site,		PIRSF006256:carbamoyltransferase, HypF type,		Complete proteome,Transferase,	Posttranslational modification, protein turnover, chaperones		6	2238	0.00268097
STM14_1253	GJ0703GL002902	STY1138	5-carboxymethyl-2-hydroxymuconate delta-isomerase(hpcD)	S. Typhi str. CT18		GO:0019439~aromatic compound catabolic process,		GO:0008704~5-carboxymethyl-2-hydroxymuconate delta-isomerase activity,	IPR004220:5-carboxymethyl-2-hydroxymuconate isomerase,IPR014347:Tautomerase/MIF superfamily,	sty00350:Tyrosine metabolism,sty01120:Microbial metabolism in diverse environments,sty01220:Degradation of aromatic compounds,			Complete proteome,Isomerase,	Amino acid transport and metabolism		1	378	0.0026455
STM14_2846	GJ0703GL001644	STY2538	acyl-CoA thioester hydrolase(yfbB)	S. Typhi str. CT18		GO:0009234~menaquinone biosynthetic process,		GO:0070205~2-succinyl-6-hydroxy-2,4-cyclohexadiene-1-carboxylate synthase activity,	IPR000073:Alpha/beta hydrolase fold-1,IPR022485:2-succinyl-6-hydroxy-2,4-cyclohexadiene-1-carboxylate synthase,	sty00130:Ubiquinone and other terpenoid-quinone biosynthesis,sty01100:Metabolic pathways,sty01110:Biosynthesis of secondary metabolites,			Complete proteome,Lyase,Menaquinone biosynthesis,	General function prediction only	chain:2-succinyl-6-hydroxy-2,4-cyclohexadiene- 1-carboxylate synthase,sequence conflict,	2	756	0.0026455
STM14_4322	GJ0703GL000265	STY4210	methyltransferase(STY4210)	S. Typhi str. CT18			GO:0005737~cytoplasm,	GO:0008990~rRNA (guanine-N2-)-methyltransferase activity,	IPR007536:Ribosomal RNA small subunit methyltransferase J,				Complete proteome,Cytoplasm,Methyltransferase,rRNA processing,S-adenosyl-L-methionine,Transferase,		chain:UPF0341 protein yhiQ,	2	756	0.0026455
STM14_4194	GJ0703GL000438	STY4314	phosphoglycolate phosphatase(gph)	S. Typhi str. CT18	Carbohydrate transport and metabolism,	GO:0005975~carbohydrate metabolic process,GO:0046295~glycolate biosynthetic process,		GO:0008967~phosphoglycolate phosphatase activity,GO:0046872~metal ion binding,	IPR006346:2-phosphoglycolate phosphatase, prokaryotic,IPR006439:HAD-superfamily hydrolase, subfamily IA, variant 1,IPR023198:Phosphoglycolate phosphatase, domain 2,IPR023214:HAD-like domain,	sty00630:Glyoxylate and dicarboxylate metabolism,sty01100:Metabolic pathways,sty01110:Biosynthesis of secondary metabolites,sty01130:Biosynthesis of antibiotics,			Carbohydrate metabolism,Chloride,Complete proteome,Hydrolase,Magnesium,Metal-binding,	General function prediction only	active site:Nucleophile,chain:Phosphoglycolate phosphatase,sequence conflict,	2	756	0.0026455
STM14_2553	GJ0703GL001888	STY2269	thiosulfate reductase cytochrome b subunit(phsC)	S. Typhi str. CT18		GO:0022904~respiratory electron transport chain,	GO:0016021~integral component of membrane,	GO:0009055~electron carrier activity,	IPR011577:Cytochrome b561, bacterial/Ni-hydrogenase,IPR016174:Di-haem cytochrome, transmembrane,	sty00920:Sulfur metabolism,sty01120:Microbial metabolism in diverse environments,			Complete proteome,Membrane,Transmembrane,Transmembrane helix,	Energy production and conversion	chain:Thiosulfate reductase cytochrome B subunit,sequence conflict,transmembrane region,	2	762	0.00262467
STM14_2858	GJ0703GL001632	STY2547	NADH dehydrogenase I subunit M(STY2547)	S. Typhi str. CT18		GO:0042773~ATP synthesis coupled electron transport,	GO:0016021~integral component of membrane,	GO:0008137~NADH dehydrogenase (ubiquinone) activity,	IPR001750:NADH:ubiquinone/plastoquinone oxidoreductase,IPR003918:NADH:ubiquinone oxidoreductase,IPR010227:NADH-quinone oxidoreductase, chain M/4,	sty00190:Oxidative phosphorylation,sty01100:Metabolic pathways,			Complete proteome,Membrane,Oxidoreductase,Transmembrane,Transmembrane helix,	Energy production and conversion		4	1527	0.00261952
STM14_0077	GJ0703GL003900	STY0076	carbamoyl-phosphate synthase small subunit(STY0076)	S. Typhi str. CT18		GO:0006207~'de novo' pyrimidine nucleobase biosynthetic process,GO:0006526~arginine biosynthetic process,GO:0006541~glutamine metabolic process,GO:0044205~'de novo' UMP biosynthetic process,		GO:0004088~carbamoyl-phosphate synthase (glutamine-hydrolyzing) activity,GO:0005524~ATP binding,	IPR002474:Carbamoyl-phosphate synthase, small subunit N-terminal domain,IPR006274:Carbamoyl-phosphate synthase, small subunit,IPR017926:Glutamine amidotransferase,	sty00240:Pyrimidine metabolism,sty00250:Alanine, aspartate and glutamate metabolism,sty01100:Metabolic pathways,		SM01097:SM01097,	Amino-acid biosynthesis,Arginine biosynthesis,ATP-binding,Complete proteome,Glutamine amidotransferase,Ligase,Nucleotide-binding,Pyrimidine biosynthesis,	Amino acid transport and metabolism / Nucleotide transport and metabolism	active site:Nucleophile,chain:Carbamoyl-phosphate synthase small chain,domain:Glutamine amidotransferase type-1,region of interest:CPSase,sequence conflict,	3	1146	0.0026178
STM14_0712	GJ0703GL003307	STY0661	molybdopterin-containing oxidoreductase membrane anchor subunit(STY0661)	S. Typhi str. CT18		GO:0019645~anaerobic electron transport chain,	GO:0016021~integral component of membrane,		IPR007059:DMSO reductase anchor subunit (DmsC),				Complete proteome,Membrane,Transmembrane,Transmembrane helix,	General function prediction only		2	765	0.00261438
STM14_1936	GJ0703GL002390	STY1465	D-alanyl-D-alanine dipeptidase(pcgL)	S. Typhi str. CT18		GO:0071555~cell wall organization,	GO:0005618~cell wall,	GO:0008237~metallopeptidase activity,GO:0008270~zinc ion binding,GO:0016805~dipeptidase activity,	IPR000755:Peptidase M15D, VanX D-ala-D-ala dipeptidase,IPR009045:Hedgehog signalling/DD-peptidase zinc-binding domain,	sty01502:Vancomycin resistance,sty02020:Two-component system,	PIRSF026671:D-alanyl-D-alanine dipeptidase,		Cell wall biogenesis/degradation,Complete proteome,Dipeptidase,Hydrolase,Metal-binding,Metalloprotease,Protease,Signal,Zinc,	Cell envelope biogenesis, outer membrane		2	768	0.00260417
STM14_5001	GJ0703GL004505	STY3725	thiamine biosynthesis protein ThiG(STY3725)	S. Typhi str. CT18		GO:0009228~thiamine biosynthetic process,GO:0009229~thiamine diphosphate biosynthetic process,	GO:0005737~cytoplasm,	GO:0016783~sulfurtransferase activity,	IPR008867:Thiazole biosynthesis,IPR013785:Aldolase-type TIM barrel,	sty00730:Thiamine metabolism,sty01100:Metabolic pathways,			Complete proteome,Cytoplasm,Schiff base,Thiamine biosynthesis,Transferase,	Nucleotide transport and metabolism	chain:Thiazole biosynthesis protein thiG,	2	768	0.00260417
STM14_0921	GJ0703GL003143	STY0828	8-amino-7-oxononanoate synthase(STY0828)	S. Typhi str. CT18	Amino acid transport and metabolism,	GO:0009102~biotin biosynthetic process,		GO:0008710~8-amino-7-oxononanoate synthase activity,GO:0030170~pyridoxal phosphate binding,	IPR001917:Aminotransferase, class-II, pyridoxal-phosphate binding site,IPR004723:8-amino-7-oxononanoate synthase/2-amino-3-ketobutyrate coenzyme A ligase,IPR004839:Aminotransferase, class I/classII,IPR015421:Pyridoxal phosphate-dependent transferase, major region, subdomain 1,IPR015422:Pyridoxal phosphate-dependent transferase, major region, subdomain 2,IPR015424:Pyridoxal phosphate-dependent tra…	sty00780:Biotin metabolism,sty01100:Metabolic pathways,			Biotin biosynthesis,Complete proteome,Pyridoxal phosphate,Transferase,	Coenzyme metabolism	binding site:Pyridoxal phosphate,binding site:Substrate,chain:8-amino-7-oxononanoate synthase,modified residue,region of interest:Pyridoxal phosphate binding,	3	1155	0.0025974
STM14_5007	GJ0703GL004499	STY3719	NADH pyrophosphatase(STY3719)	S. Typhi str. CT18				GO:0000210~NAD+ diphosphatase activity,GO:0000287~magnesium ion binding,GO:0008270~zinc ion binding,GO:0030145~manganese ion binding,	IPR000086:NUDIX hydrolase domain,IPR015376:Zinc ribbon, NADH pyrophosphatase,IPR015797:NUDIX hydrolase domain-like,IPR020084:NUDIX hydrolase, conserved site,IPR022925:NADH pyrophosphatase NudC,	sty00760:Nicotinate and nicotinamide metabolism,			Complete proteome,Hydrolase,Magnesium,Manganese,Metal-binding,NAD,Zinc,	DNA replication, recombination, and repair	chain:NADH pyrophosphatase,domain:Nudix hydrolase,short sequence motif:Nudix box,	2	771	0.00259403
STM14_3944	GJ0703GL000653	STY3445	galactitol utilization operon repressor(STY3445)	S. Typhi str. CT18	Transcription / Carbohydrate transport and metabolism,	GO:0006351~transcription, DNA-templated,	GO:0005622~intracellular,	GO:0003677~DNA binding,GO:0003700~transcription factor activity, sequence-specific DNA binding,GO:0004190~aspartic-type endopeptidase activity,	IPR001034:HTH DeoR N-terminal domain,IPR001969:Peptidase aspartic, active site,IPR011991:Winged helix-turn-helix DNA-binding domain,IPR014036:DeoR C-terminal sensor domain,IPR018356:Transcription regulator, HTH DeoR-type, conserved site,			SM00420:HTH_DEOR,	Complete proteome,DNA-binding,Transcription,Transcription regulation,	Transcription / Carbohydrate transport and metabolism		2	771	0.00259403
STM14_3688	GJ0703GL000895	STY3210	glycine cleavage system H protein(STY3210)	S. Typhi str. CT18		GO:0019464~glycine decarboxylation via glycine cleavage system,	GO:0005960~glycine cleavage complex,		IPR000089:Biotin/lipoyl attachment,IPR002930:Glycine cleavage H-protein,IPR003016:2-oxo acid dehydrogenase, lipoyl-binding site,IPR011053:Single hybrid motif,IPR017453:Glycine cleavage H-protein, subgroup,	sty00260:Glycine, serine and threonine metabolism,sty00630:Glyoxylate and dicarboxylate metabolism,sty01100:Metabolic pathways,sty01110:Biosynthesis of secondary metabolites,sty01130:Biosynthesis of antibiotics,			Complete proteome,Lipoyl,	Amino acid transport and metabolism	chain:Glycine cleavage system H protein,modified residue,	1	387	0.00258398
STM14_3478	GJ0703GL001089	STY3002	chaperone protein(sicP)	S. Typhi str. CT18		GO:0009405~pathogenesis,	GO:0005737~cytoplasm,						Chaperone,Complete proteome,Cytoplasm,Virulence,		chain:Chaperone protein sicP,	1	390	0.0025641
STM14_1305	GJ0703GL002864	STY1178	assembly/transport component in curli production(STY1178)	S. Typhi str. CT18					IPR018900:Curli assembly protein CsgE,				Complete proteome,Signal,		chain:Curli production assembly/transport component csgE,signal peptide,	1	393	0.00254453
STM14_0905	GJ0703GL003159	STY0812	molybdenum transport protein ModE(STY0812)	S. Typhi str. CT18		GO:0015689~molybdate ion transport,		GO:0003700~transcription factor activity, sequence-specific DNA binding,GO:0030151~molybdenum ion binding,	IPR000847:Transcription regulator HTH, LysR,IPR003725:Molybdenum-binding protein, N-terminal,IPR004606:Molybdenum-pterin binding,IPR005116:Transport-associated OB, type 1,IPR008995:Molybdate/tungstate binding, C-terminal,IPR011991:Winged helix-turn-helix DNA-binding domain,IPR016462:Molybdate-dependent transcriptional regulator, ModE,		PIRSF005763:molybdate-dependent transcriptional regulator, ModE type,		Complete proteome,	General function prediction only		2	786	0.00254453
STM14_0216	GJ0703GL003760	STY0200	3-methyl-2-oxobutanoate hydroxymethyltransferase(STY0200)	S. Typhi str. CT18		GO:0015940~pantothenate biosynthetic process,	GO:0005737~cytoplasm,	GO:0003864~3-methyl-2-oxobutanoate hydroxymethyltransferase activity,GO:0046872~metal ion binding,	IPR003700:Ketopantoate hydroxymethyltransferase,IPR015813:Pyruvate/Phosphoenolpyruvate kinase-like domain,	sty00770:Pantothenate and CoA biosynthesis,sty01100:Metabolic pathways,sty01110:Biosynthesis of secondary metabolites,	PIRSF000388:3-methyl-2-oxobutanoate hydroxymethyltransferase,		Complete proteome,Cytoplasm,Magnesium,Metal-binding,Pantothenate biosynthesis,Transferase,	Coenzyme metabolism	active site:Proton acceptor,binding site:Alpha-ketoisovalerate,chain:3-methyl-2-oxobutanoate hydroxymethyltransferase,metal ion-binding site:Magnesium,region of interest:Alpha-ketoisovalerate binding,	2	789	0.00253485
STM14_3912	GJ0703GL000683	STY3410	hypothetical protein(STY3410)	S. Typhi str. CT18			GO:0016021~integral component of membrane,		IPR009937:Protein of unknown function DUF1469,				Complete proteome,Membrane,Transmembrane,Transmembrane helix,	Function unknown		1	396	0.00252525
STM14_4201	GJ0703GL000431	STY4307	hypothetical protein(yrfA)	S. Typhi str. CT18					IPR019684:Protein of unknown function DUF2531,				Complete proteome,		signal peptide,	1	399	0.00250627
STM14_0468	GJ0703GL003536	STY0430	exonuclease SbcD(STY0430)	S. Typhi str. CT18		GO:0006260~DNA replication,GO:0006310~DNA recombination,		GO:0004519~endonuclease activity,GO:0008408~3'-5' exonuclease activity,	IPR004593:Exonuclease SbcD,IPR004843:Metallophosphoesterase domain,IPR026843:Nuclease SbcD C-terminal domain,				Complete proteome,DNA recombination,DNA replication,Endonuclease,Exonuclease,Hydrolase,Nuclease,	DNA replication, recombination, and repair		3	1200	0.0025
STM14_4317	GJ0703GL000270	STY4215	oxidoreductase(STY4215)	S. Typhi str. CT18				GO:0016491~oxidoreductase activity,	IPR004792:Conserved hypothetical protein CHP00275, flavoprotein HI0933-like,IPR023166:HI0933 insert-like domain,IPR023753:Pyridine nucleotide-disulphide oxidoreductase, FAD/NAD(P)-binding domain,				Complete proteome,	General function prediction only		3	1200	0.0025
STM14_5252	GJ0703GL004288	STY4727	hypothetical protein(yjfI)	S. Typhi str. CT18					IPR019231:Protein of unknown function DUF2170,				Complete proteome,	Function unknown		1	402	0.00248756
STM14_3522	GJ0703GL001048	STY3045	regulatory protein(STY3045)	S. Typhi str. CT18	Transcription,	GO:0006351~transcription, DNA-templated,		GO:0003677~DNA binding,GO:0003700~transcription factor activity, sequence-specific DNA binding,	IPR000835:Transcription regulator HTH, MarR-type,IPR011991:Winged helix-turn-helix DNA-binding domain,IPR023187:Transcriptional regulator MarR-type, conserved site,			SM00347:HTH_MARR,	Complete proteome,DNA-binding,Transcription,Transcription regulation,	Transcription	chain:Transcriptional regulator slyA,DNA-binding region:H-T-H motif,domain:HTH marR-type,helix,sequence conflict,strand,turn,	1	402	0.00248756
STM14_4186	GJ0703GL000443	STY4320	nitrite transporter(nirC)	S. Typhi str. CT18			GO:0016021~integral component of membrane,	GO:0005215~transporter activity,	IPR000292:Formate/nitrite transporter,IPR023271:Aquaporin-like,IPR024002:Formate/nitrite transporter, conserved site,				Complete proteome,Membrane,Transmembrane,Transmembrane helix,	Inorganic ion transport and metabolism	chain:Probable nitrite transporter,sequence conflict,topological domain:Cytoplasmic,topological domain:Extracellular,transmembrane region,	2	807	0.00247831
STM14_0456	GJ0703GL003547	STY0419	pyrroline-5-carboxylate reductase(STY0419)	S. Typhi str. CT18		GO:0055129~L-proline biosynthetic process,	GO:0005737~cytoplasm,	GO:0004735~pyrroline-5-carboxylate reductase activity,	IPR000304:Pyrroline-5-carboxylate reductase,IPR008927:6-phosphogluconate dehydrogenase, C-terminal-like,IPR016040:NAD(P)-binding domain,	sty00330:Arginine and proline metabolism,sty01100:Metabolic pathways,sty01110:Biosynthesis of secondary metabolites,sty01130:Biosynthesis of antibiotics,sty01230:Biosynthesis of amino acids,	PIRSF000193:pyrroline-5-carboxylate reductase,		Amino-acid biosynthesis,Complete proteome,Cytoplasm,NADP,Oxidoreductase,Proline biosynthesis,	Amino acid transport and metabolism		2	807	0.00247831
STM14_4474	GJ0703GL000136	STY4082	O-antigen ligase(waaL)	S. Typhi str. CT18	Cell envelope biogenesis, outer membrane,		GO:0016021~integral component of membrane,	GO:0016874~ligase activity,	IPR007016:O-antigen ligase-related,	sty00540:Lipopolysaccharide biosynthesis,sty01100:Metabolic pathways,			Complete proteome,Ligase,Membrane,Transmembrane,Transmembrane helix,	Cell envelope biogenesis, outer membrane		3	1212	0.00247525
STM14_1799	GJ0703GL002508	STY1576	regulatory protein(STY1576)	S. Typhi str. CT18	Transcription / Carbohydrate transport and metabolism,				IPR000600:ROK,IPR011991:Winged helix-turn-helix DNA-binding domain,				Complete proteome,	Transcription / Carbohydrate transport and metabolism		3	1218	0.00246305
STM14_3440	GJ0703GL001124	STY2968	formate hydrogenlyase maturation protein(STY2968)	S. Typhi str. CT18				GO:0016829~lyase activity,	IPR010005:Formate hydrogenlyase maturation HycH,				Complete proteome,Lyase,			1	408	0.00245098
STM14_3388	GJ0703GL001161	STY2931	ribonucleotide reductase stimulatory protein(nrdI)	S. Typhi str. CT18					IPR004465:Ribonucleotide reductase Class Ib, NrdI,IPR020852:Ribonucleotide reductase, class Ib, NrdI, bacterial,		PIRSF005087:ribonucleotide reductase NrdI,		Complete proteome,	Nucleotide transport and metabolism	chain:Protein nrdI,	1	408	0.00245098
STM14_2398	GJ0703GL001981	STY2185	flagellar motor switch protein FliN(STY2185)	S. Typhi str. CT18		GO:0006935~chemotaxis,GO:0071973~bacterial-type flagellum-dependent cell motility,	GO:0005886~plasma membrane,GO:0009425~bacterial-type flagellum basal body,GO:0031514~motile cilium,	GO:0003774~motor activity,	IPR001172:Flagellar motor switch FliN/Type III secretion HrcQb,IPR001543:Surface presentation of antigen (SpoA),IPR012826:Flagellar motor switch FliN,	sty02030:Bacterial chemotaxis,sty02040:Flagellar assembly,			Bacterial flagellum,Cell membrane,Cell projection,Chemotaxis,Cilium,Complete proteome,Flagellar rotation,Flagellum,Membrane,	Cell motility and secretion / Intracellular trafficking and secretion	chain:Flagellar motor switch protein fliN,	1	411	0.00243309
STM14_1590	GJ0703GL002685	STY1803	NH3-dependent NAD synthetase(STY1803)	S. Typhi str. CT18		GO:0009435~NAD biosynthetic process,		GO:0003952~NAD+ synthase (glutamine-hydrolyzing) activity,GO:0005524~ATP binding,GO:0008795~NAD+ synthase activity,	IPR003694:NAD synthase,IPR014729:Rossmann-like alpha/beta/alpha sandwich fold,IPR022310:NAD/GMP synthase,IPR022926:NH(3)-dependent NAD(+) synthetase,	sty00760:Nicotinate and nicotinamide metabolism,sty01100:Metabolic pathways,			ATP-binding,Complete proteome,Ligase,NAD,Nucleotide-binding,	Coenzyme metabolism	chain:NH(3)-dependent NAD(+) synthetase,helix,nucleotide phosphate-binding region:ATP,strand,turn,	2	825	0.00242424
STM14_3741	GJ0703GL000841	STY3250	Holliday junction resolvase(STY3250)	S. Typhi str. CT18		GO:0000967~rRNA 5'-end processing,	GO:0005737~cytoplasm,	GO:0003676~nucleic acid binding,GO:0004518~nuclease activity,	IPR005227:Resolvase, holliday junction-type, YqgF-like,IPR006641:YqgF/RNase H-like domain,IPR012337:Ribonuclease H-like domain,			SM00732:YqgFc,	Complete proteome,Cytoplasm,Hydrolase,Nuclease,Ribosome biogenesis,	DNA replication, recombination, and repair	chain:Putative Holliday junction resolvase,	1	414	0.00241546
STM14_1668	GJ0703GL002623	STY1749	cysteine desufuration protein SufE(STY1749)	S. Typhi str. CT18		GO:0016226~iron-sulfur cluster assembly,	GO:0005737~cytoplasm,		IPR003808:Fe-S metabolism associated domain, SufE-like,IPR023939:Cysteine desulfuration protein SufE,				Complete proteome,Cytoplasm,	General function prediction only	active site:Cysteine persulfide intermediate,chain:Cysteine desulfuration protein sufE,	1	414	0.00241546
STM14_1698	GJ0703GL002596	STY1718	pathogenicity island effector protein(sseE)	S. Typhi str. CT18					IPR022797:Type III secretion system regulator LcrR/Chaperone CesD2,				Complete proteome,			1	414	0.00241546
STM14_1416	GJ0703GL002761	STY1278	isocitrate dehydrogenase(STY1278)	S. Typhi str. CT18		GO:0006097~glyoxylate cycle,GO:0006099~tricarboxylic acid cycle,		GO:0000287~magnesium ion binding,GO:0004450~isocitrate dehydrogenase (NADP+) activity,GO:0051287~NAD binding,	IPR001804:Isocitrate and isopropylmalate dehydrogenases family,IPR004439:Isocitrate dehydrogenase NADP-dependent, dimeric, prokaryotic,IPR019818:Isocitrate/isopropylmalate dehydrogenase, conserved site,IPR024084:Isopropylmalate dehydrogenase-like domain,	sty00020:Citrate cycle (TCA cycle),sty00480:Glutathione metabolism,sty01100:Metabolic pathways,sty01110:Biosynthesis of secondary metabolites,sty01120:Microbial metabolism in diverse environments,sty01130:Biosynthesis of antibiotics,sty01200:Carbon metabolism,sty01210:2-Oxocarboxylic acid metabolism,sty01230:Biosynthesis of amino acids,		SM01329:SM01329,	Complete proteome,Glyoxylate bypass,Manganese,Metal-binding,NADP,Oxidoreductase,Tricarboxylic acid cycle,	Energy production and conversion		3	1248	0.00240385
STM14_3644	GJ0703GL000932	STY3163	5-keto-4-deoxyuronate isomerase(STY3163)	S. Typhi str. CT18		GO:0045490~pectin catabolic process,		GO:0008270~zinc ion binding,GO:0008697~4-deoxy-L-threo-5-hexosulose-uronate ketol-isomerase activity,	IPR007045:5-keto 4-deoxyuronate isomerase,IPR011051:RmlC-like cupin domain,IPR021120:KduI/IolB isomerase,IPR027447:5-keto-4-deoxyuronate isomerase, C-terminal domain,IPR027449:5-keto-4-deoxyuronate isomerase, N-terminal domain,	sty00040:Pentose and glucuronate interconversions,	PIRSF006625:5-keto-4-deoxyuronate isomerase,		Complete proteome,Isomerase,Metal-binding,Zinc,	Carbohydrate transport and metabolism	chain:4-deoxy-L-threo-5-hexosulose-uronate ketol-isomerase,	2	834	0.00239808
STM14_4865	GJ0703GL004609	STY3827	L-rhamnose isomerase(STY3827)	S. Typhi str. CT18		GO:0019301~rhamnose catabolic process,	GO:0005737~cytoplasm,	GO:0008740~L-rhamnose isomerase activity,GO:0030145~manganese ion binding,	IPR009308:Rhamnose isomerase,IPR013022:Xylose isomerase-like, TIM barrel domain,	sty00051:Fructose and mannose metabolism,sty01120:Microbial metabolism in diverse environments,			Complete proteome,Cytoplasm,Isomerase,Manganese,Metal-binding,Rhamnose metabolism,		chain:L-rhamnose isomerase,metal ion-binding site:Manganese,sequence conflict,	3	1257	0.00238663
STM14_3592	GJ0703GL000971	STY3118	L-fucose mutarotase(STY3118)	S. Typhi str. CT18		GO:0042354~L-fucose metabolic process,	GO:0005737~cytoplasm,	GO:0016854~racemase and epimerase activity,GO:0042806~fucose binding,	IPR007721:D-ribose pyranase RbsD/L-fucose mutarotase FucU,IPR023750:D-ribose pyranase RbsD-like,IPR023751:L-fucose mutarotase,				Carbohydrate metabolism,Complete proteome,Cytoplasm,Fucose metabolism,Isomerase,	Carbohydrate transport and metabolism	active site:Proton donor,binding site:Substrate,chain:L-fucose mutarotase,region of interest:Substrate binding,	1	420	0.00238095
STM14_3857	GJ0703GL000730	STY3362	hypothetical protein(STY3362)	S. Typhi str. CT18					IPR009659:Protein of unknown function DUF1249,				Complete proteome,	Function unknown		1	420	0.00238095
STM14_4719	GJ0703GL004732	STY3634	UDP-ManNAc dehydrogenase(STY3634)	S. Typhi str. CT18		GO:0009246~enterobacterial common antigen biosynthetic process,		GO:0016628~oxidoreductase activity, acting on the CH-CH group of donors, NAD or NADP as acceptor,GO:0051287~NAD binding,GO:0089714~UDP-N-acetyl-D-mannosamine dehydrogenase activity,	IPR001732:UDP-glucose/GDP-mannose dehydrogenase, N-terminal,IPR008927:6-phosphogluconate dehydrogenase, C-terminal-like,IPR014026:UDP-glucose/GDP-mannose dehydrogenase, dimerisation,IPR014027:UDP-glucose/GDP-mannose dehydrogenase, C-terminal,IPR016040:NAD(P)-binding domain,IPR017476:Nucleotide sugar dehydrogenase,	sty00520:Amino sugar and nucleotide sugar metabolism,	PIRSF000124:UDP-glucose/GDP-mannose dehydrogenase,PIRSF500136:UDP-N-acetyl-D-mannosaminuronate dehydrogenase [Parent=PIRSF000124],	SM00984:SM00984,	Complete proteome,NAD,Oxidoreductase,	Cell envelope biogenesis, outer membrane	chain:UDP-N-acetyl-D-mannosamine dehydrogenase,nucleotide phosphate-binding region:NAD,signal peptide,	3	1260	0.00238095
STM14_2832	GJ0703GL001657	STY2525	nucleoside triphosphatase NudI(STY2525)	S. Typhi str. CT18				GO:0000287~magnesium ion binding,GO:0004170~dUTP diphosphatase activity,GO:0047840~dCTP diphosphatase activity,	IPR000086:NUDIX hydrolase domain,IPR015797:NUDIX hydrolase domain-like,IPR020084:NUDIX hydrolase, conserved site,IPR020476:NUDIX hydrolase,IPR023781:Nucleoside triphosphatase NudI,				Complete proteome,Hydrolase,Magnesium,	Nucleotide transport and metabolism	chain:Nucleoside triphosphatase nudI,domain:Nudix hydrolase,short sequence motif:Nudix box,	1	423	0.00236407
STM14_5199	GJ0703GL004332	STY4682	thiol:disulfide interchange protein DsbD(dsbD)	S. Typhi str. CT18		GO:0017004~cytochrome complex assembly,GO:0045454~cell redox homeostasis,	GO:0005886~plasma membrane,GO:0016021~integral component of membrane,	GO:0009055~electron carrier activity,GO:0047134~protein-disulfide reductase activity,	IPR003834:Cytochrome c assembly protein, transmembrane domain,IPR012336:Thioredoxin-like fold,IPR013766:Thioredoxin domain,IPR017937:Thioredoxin, conserved site,IPR022910:Thiol:disulphide interchange protein DsbD,				Cell inner membrane,Cell membrane,Complete proteome,Cytochrome c-type biogenesis,Disulfide bond,Electron transport,Membrane,NAD,Oxidoreductase,Redox-active center,Signal,Transmembrane,Transmembrane helix,Transport,	Posttranslational modification, protein turnover, chaperones / Energy production and conversion	chain:Thiol:disulfide interchange protein dsbD,disulfide bond,domain:Thioredoxin,signal peptide,transmembrane region,	4	1701	0.00235156
STM14_4025	GJ0703GL000582	STY3514	cytosine deaminase(STY3514)	S. Typhi str. CT18	Nucleotide transport and metabolism / General function prediction only,			GO:0016810~hydrolase activity, acting on carbon-nitrogen (but not peptide) bonds,	IPR011059:Metal-dependent hydrolase, composite domain,IPR013108:Amidohydrolase 3,	sty00240:Pyrimidine metabolism,sty00330:Arginine and proline metabolism,sty01100:Metabolic pathways,			Complete proteome,	Nucleotide transport and metabolism / General function prediction only		3	1278	0.00234742
STM14_3385	GJ0703GL001164	STY2928	hypothetical protein(STY2928)	S. Typhi str. CT18				GO:0004601~peroxidase activity,GO:0051920~peroxiredoxin activity,	IPR003779:Carboxymuconolactone decarboxylase,IPR004675:Alkylhydroperoxidase AhpD core,				Antioxidant,Complete proteome,Disulfide bond,Oxidoreductase,Peroxidase,Redox-active center,	Function unknown		1	429	0.002331
STM14_1742	GJ0703GL002556	STY1678	transcriptional regulator(slyA)	S. Typhi str. CT18	Transcription,	GO:0006351~transcription, DNA-templated,GO:0009405~pathogenesis,		GO:0003677~DNA binding,GO:0003700~transcription factor activity, sequence-specific DNA binding,	IPR000835:Transcription regulator HTH, MarR-type,IPR011991:Winged helix-turn-helix DNA-binding domain,IPR023071:Transcriptional regulator, SlyA,IPR023187:Transcriptional regulator MarR-type, conserved site,			SM00347:HTH_MARR,	Activator,Complete proteome,DNA-binding,Repressor,Transcription,Transcription regulation,Virulence,	Transcription	chain:Transcriptional regulator slyA,DNA-binding region:H-T-H motif,domain:HTH marR-type,helix,sequence conflict,strand,turn,	1	432	0.00231481
STM14_2084	GJ0703GL002242	STY1329	metal-dependent phosphoesterase(STY1329)	S. Typhi str. CT18	General function prediction only,	GO:0006260~DNA replication,		GO:0003677~DNA binding,GO:0003887~DNA-directed DNA polymerase activity,GO:0016787~hydrolase activity,	IPR003141:Polymerase/histidinol phosphatase, N-terminal,IPR004013:PHP, C-terminal,IPR016195:Polymerase/histidinol phosphatase-like,			SM00481:POLIIIAc,	Complete proteome,Hydrolase,	General function prediction only	chain:Protein trpH,	2	867	0.00230681
STM14_4276	GJ0703GL000369	STY4260	gamma-glutamyltranspeptidase(ggt)	S. Typhi str. CT18		GO:0006749~glutathione metabolic process,		GO:0003840~gamma-glutamyltransferase activity,	IPR000101:Gamma-glutamyltranspeptidase,	sty00430:Taurine and hypotaurine metabolism,sty00460:Cyanoamino acid metabolism,sty00480:Glutathione metabolism,sty01100:Metabolic pathways,			Acyltransferase,Complete proteome,Signal,Transferase,	Amino acid transport and metabolism	signal peptide,	4	1740	0.00229885
STM14_4903	GJ0703GL004572	STY3792	aldolase(STY3792)	S. Typhi str. CT18	Carbohydrate transport and metabolism,		GO:0005737~cytoplasm,	GO:0016747~transferase activity, transferring acyl groups other than amino-acyl groups,GO:0016829~lyase activity,	IPR002915:DeoC/FbaB/ lacD aldolase,IPR013785:Aldolase-type TIM barrel,		PIRSF038992:class Ia aldolase,	SM01133:SM01133,	Complete proteome,Cytoplasm,Schiff base,Transferase,		active site:Schiff-base intermediate with substrate,chain:Uncharacterized aldolase lsrF,	2	873	0.00229095
STM14_5158	GJ0703GL004368	STY4487	hypothetical protein(STY4487)	S. Typhi str. CT18									Complete proteome,	Function unknown		1	441	0.00226757
STM14_5118	GJ0703GL004399	STY4453	integral membrane protein(STY4453)	S. Typhi str. CT18			GO:0016021~integral component of membrane,	GO:0008565~protein transporter activity,	IPR002898:MotA/TolQ/ExbB proton channel,				Complete proteome,Membrane,Protein transport,Transmembrane,Transmembrane helix,Transport,			2	882	0.00226757
STM14_1756	GJ0703GL002542	STY1665	NADH reducing dehydrogenase(STY1665)	S. Typhi str. CT18		GO:0055114~oxidation-reduction process,	GO:0005886~plasma membrane,	GO:0009055~electron carrier activity,GO:0046872~metal ion binding,GO:0051539~4 iron, 4 sulfur cluster binding,	IPR009051:Alpha-helical ferredoxin,IPR010208:Electron transport complex, RnfC,IPR011538:NADH:ubiquinone oxidoreductase, 51kDa subunit,IPR017896:4Fe-4S ferredoxin-type, iron-sulpur binding domain,IPR017900:4Fe-4S ferredoxin, iron-sulphur binding, conserved site,IPR019554:Soluble ligand binding domain,IPR026902:RnfC Barrel sandwich hybrid domain,				4Fe-4S,Cell inner membrane,Cell membrane,Complete proteome,Electron transport,Iron,Iron-sulfur,Membrane,Metal-binding,Repeat,Transport,	Energy production and conversion		5	2205	0.00226757
STM14_5476	GJ0703GL004063	STY4908	ribosomal-protein-alanine acetyltransferase(rimI)	S. Typhi str. CT18	General function prediction only,	GO:0006474~N-terminal protein amino acid acetylation,	GO:0005737~cytoplasm,	GO:0008999~ribosomal-protein-alanine N-acetyltransferase activity,	IPR000182:GNAT domain,IPR006464:Ribosomal-protein-alanine acetyltransferase,IPR016181:Acyl-CoA N-acyltransferase,				Acyltransferase,Complete proteome,Cytoplasm,Transferase,	General function prediction only		1	444	0.00225225
STM14_5147	GJ0703GL004376	STY4480	cytochrome c-type biogenesis protein(STY4480)	S. Typhi str. CT18			GO:0016021~integral component of membrane,		IPR005616:Cytochrome C biogenesis protein CcmH,IPR017565:Formate-dependent nitrite reductase complex, subunit NrfF,				Complete proteome,Membrane,Transmembrane,Transmembrane helix,	Posttranslational modification, protein turnover, chaperones		5	2220	0.00225225
STM14_3151	GJ0703GL001327	STY2817	phophosugar binding protein(STY2817)	S. Typhi str. CT18		GO:0005975~carbohydrate metabolic process,GO:0009254~peptidoglycan turnover,GO:0046348~amino sugar catabolic process,GO:0097173~N-acetylmuramic acid catabolic process,GO:0097175~1,6-anhydro-N-acetyl-beta-muramic acid catabolic process,		GO:0016835~carbon-oxygen lyase activity,GO:0030246~carbohydrate binding,	IPR001347:Sugar isomerase (SIS),IPR005486:Glucokinase regulatory, conserved site,IPR005488:N-acetylmuramic acid 6-phosphate etherase MurQ,	sty00520:Amino sugar and nucleotide sugar metabolism,			Carbohydrate metabolism,Complete proteome,Lyase,	General function prediction only	active site:Proton donor,chain:N-acetylmuramic acid 6-phosphate etherase,domain:SIS,	2	891	0.00224467
STM14_5278	GJ0703GL004266	STY4750	50s ribosomal subunit protein L9(rplI)	S. Typhi str. CT18		GO:0006412~translation,	GO:0005840~ribosome,	GO:0003735~structural constituent of ribosome,GO:0019843~rRNA binding,	IPR000244:Ribosomal protein L9,IPR009027:Ribosomal protein L9/RNase H1, N-terminal,IPR020069:Ribosomal protein L9, C-terminal,IPR020070:Ribosomal protein L9, N-terminal,IPR020594:Ribosomal protein L9, bacteria/chloroplast,	sty03010:Ribosome,			Complete proteome,Ribonucleoprotein,Ribosomal protein,RNA-binding,rRNA-binding,	Translation, ribosomal structure and biogenesis	chain:50S ribosomal protein L9,	1	447	0.00223714
STM14_3006	GJ0703GL001456	STY2685	hypothetical protein(STY2685)	S. Typhi str. CT18			GO:0016021~integral component of membrane,		IPR021318:Protein of unknown function DUF2919,				Complete proteome,Membrane,Transmembrane,Transmembrane helix,			1	447	0.00223714
STM14_3009	GJ0703GL001453	STY2688	coproporphyrinogen III oxidase(STY2688)	S. Typhi str. CT18		GO:0006782~protoporphyrinogen IX biosynthetic process,	GO:0005737~cytoplasm,	GO:0004109~coproporphyrinogen oxidase activity,GO:0042803~protein homodimerization activity,GO:0046872~metal ion binding,	IPR001260:Coproporphyrinogen III oxidase, aerobic,IPR018375:Coproporphyrinogen III oxidase, conserved site,	sty00860:Porphyrin and chlorophyll metabolism,sty01100:Metabolic pathways,sty01110:Biosynthesis of secondary metabolites,	PIRSF000166:coproporphyrinogen oxidase,		Complete proteome,Cytoplasm,Heme biosynthesis,Metal-binding,Oxidoreductase,Porphyrin biosynthesis,	Coenzyme metabolism	active site:Proton donor,binding site:Substrate,chain:Coproporphyrinogen-III oxidase, aerobic,region of interest:Important for dimerization,region of interest:Substrate binding,site:Important for dimerization,	2	897	0.00222965
STM14_4884	GJ0703GL004589	STY3810	transmembrane efflux protein(STY3810)	S. Typhi str. CT18		GO:0006829~zinc II ion transport,GO:0015684~ferrous iron transport,	GO:0005886~plasma membrane,GO:0016021~integral component of membrane,	GO:0046873~metal ion transmembrane transporter activity,	IPR002524:Cation efflux protein,IPR023783:Cation efflux pump FieF,IPR027469:Cation efflux protein transmembrane domain,IPR027470:Cation efflux protein cytoplasmic domain,				Cell inner membrane,Cell membrane,Complete proteome,Membrane,Transmembrane,Transmembrane helix,Transport,	Inorganic ion transport and metabolism	chain:Cation-efflux pump fieF,topological domain:Cytoplasmic,topological domain:Periplasmic,transmembrane region,	2	900	0.00222222
STM14_4327	GJ0703GL000260	STY4205	glutathione reductase(STY4205)	S. Typhi str. CT18		GO:0006749~glutathione metabolic process,GO:0045454~cell redox homeostasis,	GO:0005623~cell,	GO:0004362~glutathione-disulfide reductase activity,GO:0050660~flavin adenine dinucleotide binding,GO:0050661~NADP binding,	IPR004099:Pyridine nucleotide-disulphide oxidoreductase, dimerisation,IPR006322:Glutathione reductase, eukaryote/bacterial,IPR012999:Pyridine nucleotide-disulphide oxidoreductase, class I, active site,IPR016156:FAD/NAD-linked reductase, dimerisation,IPR023753:Pyridine nucleotide-disulphide oxidoreductase, FAD/NAD(P)-binding domain,	sty00480:Glutathione metabolism,			Complete proteome,FAD,Flavoprotein,Oxidoreductase,Redox-active center,	Energy production and conversion		3	1350	0.00222222
STM14_3160	GJ0703GL001318	STY2826	GTP-binding protein(STY2826)	S. Typhi str. CT18		GO:0042274~ribosomal small subunit biogenesis,	GO:0005737~cytoplasm,GO:0005886~plasma membrane,	GO:0003924~GTPase activity,GO:0005525~GTP binding,GO:0070181~small ribosomal subunit rRNA binding,	IPR004044:K Homology domain, type 2,IPR005225:Small GTP-binding protein domain,IPR005662:GTP-binding protein Era,IPR006073:GTP binding domain,IPR009019:K homology domain, prokaryotic type,IPR015946:K homology domain-like, alpha/beta,IPR027417:P-loop containing nucleoside triphosphate hydrolase,				Cell inner membrane,Cell membrane,Complete proteome,Cytoplasm,GTP-binding,Membrane,Nucleotide-binding,Ribosome biogenesis,RNA-binding,rRNA-binding,	General function prediction only	chain:GTP-binding protein era,chain:GTP-binding protein era homolog,domain:KH type-2,modified residue,nucleotide phosphate-binding region:GTP,sequence conflict,	2	903	0.00221484
STM14_0150	GJ0703GL003839	STY0144	UDP-N-acetylmuramoylalanyl-D-glutamyl-2,6-diaminopimelate--D-alan alanyl ligase(STY0144)	S. Typhi str. CT18		GO:0007049~cell cycle,GO:0008360~regulation of cell shape,GO:0009252~peptidoglycan biosynthetic process,GO:0051301~cell division,GO:0071555~cell wall organization,	GO:0005737~cytoplasm,	GO:0005524~ATP binding,GO:0047480~UDP-N-acetylmuramoyl-tripeptide-D-alanyl-D-alanine ligase activity,	IPR000713:Mur ligase, N-terminal,IPR004101:Mur ligase, C-terminal,IPR005863:UDP-MurNAc-pentapeptide synthetase,IPR013221:Mur ligase, central,	sty00300:Lysine biosynthesis,sty00550:Peptidoglycan biosynthesis,sty01100:Metabolic pathways,sty01502:Vancomycin resistance,			ATP-binding,Cell cycle,Cell division,Cell shape,Cell wall biogenesis/degradation,Complete proteome,Cytoplasm,Ligase,Nucleotide-binding,Peptidoglycan synthesis,	Cell envelope biogenesis, outer membrane		3	1356	0.00221239
STM14_1241	GJ0703GL002911	STY1127	histidine kinase(copS)	S. Typhi str. CT18			GO:0005622~intracellular,GO:0016021~integral component of membrane,	GO:0000155~phosphorelay sensor kinase activity,	IPR003594:Histidine kinase-like ATPase, ATP-binding domain,IPR003660:HAMP linker domain,IPR003661:Signal transduction histidine kinase, subgroup 1, dimerisation/phosphoacceptor domain,IPR005467:Signal transduction histidine kinase, core,IPR006290:Signal transduction histidine kinase, heavy metal sensor,			SM00387:HATPase_c,SM00388:HisKA,	Complete proteome,Kinase,Transferase,	Signal transduction mechanisms	signal peptide,	3	1362	0.00220264
STM14_4673	GJ0703GL004771	STY3902	regulatory protein(STY3902)	S. Typhi str. CT18		GO:0006351~transcription, DNA-templated,	GO:0005622~intracellular,	GO:0003700~transcription factor activity, sequence-specific DNA binding,GO:0043565~sequence-specific DNA binding,	IPR000485:AsnC-type HTH domain,IPR011008:Dimeric alpha-beta barrel,IPR011991:Winged helix-turn-helix DNA-binding domain,IPR019885:Transcription regulator HTH, AsnC-type, conserved site,IPR019887:Transcription regulator AsnC-type, C-terminal,IPR019888:Transcription regulator AsnC-type,			SM00344:HTH_ASNC,	Complete proteome,DNA-binding,Transcription,Transcription regulation,	Transcription	chain:Asparaginyl-tRNA synthetase,helix,sequence conflict,strand,turn,	1	456	0.00219298
STM14_5352	GJ0703GL004195	STY4799	aspartate carbamoyltransferase regulatory subunit(pyrI)	S. Typhi str. CT18		GO:0006207~'de novo' pyrimidine nucleobase biosynthetic process,GO:0006221~pyrimidine nucleotide biosynthetic process,	GO:0009347~aspartate carbamoyltransferase complex,	GO:0046872~metal ion binding,	IPR002801:Aspartate transcarbamylase regulatory subunit,IPR020542:Aspartate carbamoyltransferase regulatory subunit, C-terminal,IPR020545:Aspartate carbamoyltransferase regulatory subunit, N-terminal,	sty00240:Pyrimidine metabolism,sty00250:Alanine, aspartate and glutamate metabolism,sty01100:Metabolic pathways,			Complete proteome,Metal-binding,Pyrimidine biosynthesis,Zinc,	Nucleotide transport and metabolism	chain:Aspartate carbamoyltransferase regulatory chain,metal ion-binding site:Zinc,	1	459	0.00217865
STM14_1413	GJ0703GL002764	STY1275	mutT family protein(STY1275)	S. Typhi str. CT18				GO:0004787~thiamine-pyrophosphatase activity,GO:0017111~nucleoside-triphosphatase activity,	IPR000086:NUDIX hydrolase domain,IPR015797:NUDIX hydrolase domain-like,IPR020084:NUDIX hydrolase, conserved site,IPR020476:NUDIX hydrolase,				Complete proteome,Hydrolase,	Nucleotide transport and metabolism		1	459	0.00217865
STM14_2535	GJ0703GL001905	STY2251	propanediol utilization protein PduK(pduK)	S. Typhi str. CT18	Secondary metabolites biosynthesis, transport, and catabolism / Energy production and conversion,				IPR000249:Microcompartment protein, bacteria,			SM00877:SM00877,	Complete proteome,	Secondary metabolites biosynthesis, transport, and catabolism / Energy production and conversion		1	459	0.00217865
STM14_5238	GJ0703GL004301	STY4714	tRNA(ANN) t(6)A37 threonylcarbamoyladenosine modification protein(yjeE)	S. Typhi str. CT18		GO:0002949~tRNA threonylcarbamoyladenosine modification,		GO:0016740~transferase activity,	IPR003442:tRNA threonylcarbamoyl adenosine modification protein YjeE,IPR027417:P-loop containing nucleoside triphosphate hydrolase,				Complete proteome,Transferase,	General function prediction only		1	459	0.00217865
STM14_1687	GJ0703GL002604	STY1728	two-component sensor kinase(ssrA)	S. Typhi str. CT18	Signal transduction mechanisms,		GO:0005622~intracellular,GO:0016021~integral component of membrane,	GO:0000155~phosphorelay sensor kinase activity,	IPR001789:Signal transduction response regulator, receiver domain,IPR003594:Histidine kinase-like ATPase, ATP-binding domain,IPR003660:HAMP linker domain,IPR003661:Signal transduction histidine kinase, subgroup 1, dimerisation/phosphoacceptor domain,IPR004358:Signal transduction histidine kinase-related protein, C-terminal,IPR005467:Signal transduction histidine kinase, core,IPR008207:Signal tran…	sty02020:Two-component system,		SM00304:HAMP,SM00387:HATPase_c,SM00388:HisKA,SM00448:REC,	Complete proteome,Kinase,Transferase,	Signal transduction mechanisms	signal peptide,	6	2760	0.00217391
STM14_0729	GJ0703GL003292	STY0676	C4-dicarboxylate anaerobic carrier(dcuC)	S. Typhi str. CT18			GO:0016021~integral component of membrane,	GO:0015556~C4-dicarboxylate transmembrane transporter activity,	IPR004669:C4-dicarboxylate anaerobic carrier,IPR018385:C4-dicarboxylate anaerobic carrier-like,				Complete proteome,Membrane,Transmembrane,Transmembrane helix,	Energy production and conversion		3	1383	0.0021692
STM14_0171	GJ0703GL003817	STY0165	protein transport protein HofB(STY0165)	S. Typhi str. CT18		GO:0006810~transport,		GO:0005524~ATP binding,	IPR001482:Type II secretion system protein E,IPR007831:General secretory system II, protein E, N-terminal,IPR027417:P-loop containing nucleoside triphosphate hydrolase,				Complete proteome,	Cell motility and secretion / Intracellular trafficking and secretion		3	1383	0.0021692
STM14_4026	GJ0703GL000581	STY3515	hypothetical protein(STY3515)	S. Typhi str. CT18					IPR004375:Conserved hypothetical protein CHP00022,				Complete proteome,	Carbohydrate transport and metabolism		1	465	0.00215054
STM14_2000	GJ0703GL002323	STY1412	tRNA 2-thiocytidine biosynthesis protein TtcA(STY1412)	S. Typhi str. CT18		GO:0008033~tRNA processing,	GO:0005737~cytoplasm,	GO:0005524~ATP binding,	IPR011063:tRNA(Ile)-lysidine/2-thiocytidine synthase,IPR012089:2-thiocytidine tRNA biosynthesis protein, TtcA,IPR014729:Rossmann-like alpha/beta/alpha sandwich fold,		PIRSF004976:PP-loop ATPase, Ncs6p/YdaO type,		ATP-binding,Complete proteome,Cytoplasm,Nucleotide-binding,tRNA processing,	Cell division and chromosome partitioning	chain:tRNA 2-thiocytidine biosynthesis protein ttcA,nucleotide phosphate-binding region:ATP,short sequence motif:CXXC,	2	933	0.00214362
STM14_2593	GJ0703GL001859	STY2309	colanic acid biosynthesis protein WcaM(STY2309)	S. Typhi str. CT18					IPR006311:Twin-arginine translocation pathway, signal sequence,IPR011050:Pectin lyase fold/virulence factor,IPR012334:Pectin lyase fold,IPR023882:Colanic acid biosynthesis WcaM,				Complete proteome,Signal,		chain:Colanic acid biosynthesis protein wcaM,signal peptide,	3	1401	0.00214133
STM14_0555	GJ0703GL003455	STY0514	hypothetical protein(STY0514)	S. Typhi str. CT18			GO:0016021~integral component of membrane,		IPR019713:Inner membrane protein YlaC,				Complete proteome,Membrane,Transmembrane,Transmembrane helix,			1	468	0.00213675
STM14_3615	GJ0703GL000951	STY3138	prepilin peptidase dependent protein A(STY3138)	S. Typhi str. CT18			GO:0016021~integral component of membrane,		IPR012902:Prokaryotic N-terminal methylation site,				Complete proteome,Membrane,Transmembrane,Transmembrane helix,	Cell motility and secretion / Intracellular trafficking and secretion		1	468	0.00213675
STM14_2946	GJ0703GL001507	STY2632	outer membrane protease E(STY2632)	S. Typhi str. CT18			GO:0009279~cell outer membrane,	GO:0004190~aspartic-type endopeptidase activity,	IPR000036:Peptidase A26, omptin,IPR020079:Peptidase A26, omptin, conserved site,IPR020080:Outer membrane adhesin/peptidase omptin,IPR023619:Peptidase A26,	sty01503:Cationic antimicrobial peptide (CAMP) resistance,sty02020:Two-component system,	PIRSF001522:Outer membrane protease, OmpP type,		Complete proteome,Hydrolase,Protease,Signal,	Cell envelope biogenesis, outer membrane	chain:Outer membrane protease E,sequence conflict,signal peptide,	2	936	0.00213675
STM14_0914	GJ0703GL003150	STY0821	formiminoglutamase(hutG)	S. Typhi str. CT18		GO:0019556~histidine catabolic process to glutamate and formamide,GO:0019557~histidine catabolic process to glutamate and formate,		GO:0030145~manganese ion binding,GO:0050415~formimidoylglutamase activity,	IPR005923:Formiminoglutamase,IPR006035:Ureohydrolase,IPR023696:Ureohydrolase domain,	sty00340:Histidine metabolism,sty01100:Metabolic pathways,	PIRSF036979:ureohydrolase/formiminoglutamase/proclavaminate amidino hydrolase,		Complete proteome,Histidine metabolism,Hydrolase,Manganese,Metal-binding,	Amino acid transport and metabolism	chain:Formimidoylglutamase,metal ion-binding site:Manganese 1,metal ion-binding site:Manganese 2,sequence conflict,	2	939	0.00212993
STM14_5005	GJ0703GL004501	STY3721	thiamine biosynthesis protein ThiC(STY3721)	S. Typhi str. CT18		GO:0009228~thiamine biosynthetic process,GO:0009229~thiamine diphosphate biosynthetic process,		GO:0008270~zinc ion binding,GO:0016829~lyase activity,GO:0051539~4 iron, 4 sulfur cluster binding,	IPR002817:Thiamine biosynthesis protein ThiC,IPR025747:ThiC-associated domain,	sty00730:Thiamine metabolism,sty01100:Metabolic pathways,			4Fe-4S,Complete proteome,Iron,Iron-sulfur,Lyase,Metal-binding,S-adenosyl-L-methionine,Thiamine biosynthesis,Zinc,	Coenzyme metabolism	chain:Thiamine biosynthesis protein thiC,	4	1881	0.00212653
STM14_2602	GJ0703GL001851	STY2319	O-antigen biosynthesis protein(STY2319)	S. Typhi str. CT18				GO:0000287~magnesium ion binding,GO:0008727~GDP-mannose mannosyl hydrolase activity,GO:0030145~manganese ion binding,	IPR000086:NUDIX hydrolase domain,IPR015797:NUDIX hydrolase domain-like,IPR020084:NUDIX hydrolase, conserved site,		PIRSF037599:GDP-mannose mannosyl hydrolase,		Complete proteome,Hydrolase,Magnesium,Metal-binding,	Nucleotide transport and metabolism		1	471	0.00212314
STM14_0761	GJ0703GL003264	STY0704	hypothetical protein(STY0704)	S. Typhi str. CT18					IPR009912:Protein of unknown function DUF1451,				Complete proteome,			1	471	0.00212314
STM14_0778	GJ0703GL003249	STY0714	metal-binding heat shock protein(STY0714)	S. Typhi str. CT18		GO:0006364~rRNA processing,	GO:0005737~cytoplasm,	GO:0004222~metalloendopeptidase activity,GO:0004521~endoribonuclease activity,GO:0008270~zinc ion binding,	IPR002036:Endoribonuclease YbeY,IPR020549:Endoribonuclease YbeY, conserved site,IPR023091:Metalloprotease catalytic domain, predicted,				Complete proteome,Cytoplasm,Endonuclease,Hydrolase,Metal-binding,Nuclease,Ribosome biogenesis,rRNA processing,Zinc,	General function prediction only	chain:Putative metalloprotease ybeY,metal ion-binding site:Zinc; catalytic,	1	471	0.00212314
STM14_4218	GJ0703GL000417	STY4293	transcription elongation factor GreB(greB)	S. Typhi str. CT18		GO:0006351~transcription, DNA-templated,GO:0032784~regulation of DNA-templated transcription, elongation,		GO:0003677~DNA binding,	IPR001437:Transcription elongation factor, GreA/GreB, C-terminal,IPR006358:Transcription elongation factor GreB,IPR018151:Transcription elongation factor, GreA/GreB, conserved site,IPR022691:Transcription elongation factor, GreA/GreB, N-terminal,IPR023459:Transcription elongation factor GreA/GreB,		PIRSF006092:transcription elongation factor GreA/GreB,		Complete proteome,DNA-binding,Transcription,Transcription regulation,	Transcription	chain:Transcription elongation factor greB,	1	471	0.00212314
STM14_1695	GJ0703GL002599	STY1721	type III secretion system chaperone protein(sscA)	S. Typhi str. CT18		GO:0006950~response to stress,			IPR005415:Type III secretion system, low calcium response, chaperone LcrH/SycD,IPR011990:Tetratricopeptide-like helical,IPR016379:Type III secretion system, low calcium response, chaperone LcrH/SycD, subgroup,		PIRSF003165:chaperone protein, SicA type,		Complete proteome,			1	471	0.00212314
STM14_0112	GJ0703GL003872	STY0108	organic solvent tolerance protein(STY0108)	S. Typhi str. CT18		GO:0010033~response to organic substance,GO:0015920~lipopolysaccharide transport,GO:0043165~Gram-negative-bacterium-type cell outer membrane assembly,	GO:0009279~cell outer membrane,		IPR005653:Organic solvent tolerance-like, N-terminal,IPR007543:Organic solvent tolerance protein, C-terminal,IPR020889:Lipopolysaccharide assembly, LptD,				Cell outer membrane,Complete proteome,Disulfide bond,Membrane,Signal,	Cell envelope biogenesis, outer membrane	chain:LPS-assembly protein lptD,signal peptide,	5	2358	0.00212044
STM14_0059	GJ0703GL003919	STY0058	4-hydroxy-3-methylbut-2-enyl diphosphate reductase(STY0058)	S. Typhi str. CT18		GO:0016114~terpenoid biosynthetic process,GO:0019288~isopentenyl diphosphate biosynthetic process, methylerythritol 4-phosphate pathway,GO:0050992~dimethylallyl diphosphate biosynthetic process,		GO:0046872~metal ion binding,GO:0051538~3 iron, 4 sulfur cluster binding,GO:0051745~4-hydroxy-3-methylbut-2-en-1-yl diphosphate reductase activity,	IPR003451:LytB protein,	sty00900:Terpenoid backbone biosynthesis,sty01100:Metabolic pathways,sty01110:Biosynthesis of secondary metabolites,sty01130:Biosynthesis of antibiotics,			3Fe-4S,Complete proteome,Iron,Iron-sulfur,Isoprene biosynthesis,Metal-binding,NADP,Oxidoreductase,	Lipid metabolism / Cell envelope biogenesis, outer membrane	chain:4-hydroxy-3-methylbut-2-enyl diphosphate reductase,	2	948	0.0021097
STM14_3516	GJ0703GL001054	STY3039	nucleoside-diphosphate-sugar epimerase(STY3039)	S. Typhi str. CT18	Cell envelope biogenesis, outer membrane / Carbohydrate transport and metabolism,			GO:0003824~catalytic activity,GO:0050662~coenzyme binding,	IPR001509:NAD-dependent epimerase/dehydratase,IPR016040:NAD(P)-binding domain,				Complete proteome,	Cell envelope biogenesis, outer membrane / Carbohydrate transport and metabolism		2	948	0.0021097
STM14_1934	GJ0703GL002392	STY1467	aldehyde dehydrogenase(STY1467)	S. Typhi str. CT18		GO:0009447~putrescine catabolic process,		GO:0019145~aminobutyraldehyde dehydrogenase activity,GO:0033737~1-pyrroline dehydrogenase activity,GO:0051287~NAD binding,	IPR015590:Aldehyde dehydrogenase domain,IPR015657:Aminobutyraldehyde dehydrogenase,IPR016161:Aldehyde/histidinol dehydrogenase,IPR016162:Aldehyde dehydrogenase, N-terminal,IPR016163:Aldehyde dehydrogenase, C-terminal,IPR017749:1-pyrroline dehydrogenase,	sty00330:Arginine and proline metabolism,sty00410:beta-Alanine metabolism,sty01100:Metabolic pathways,			Complete proteome,NAD,Oxidoreductase,	Energy production and conversion	active site:Nucleophile,binding site:NAD,binding site:NAD; via carbonyl oxygen,chain:Gamma-aminobutyraldehyde dehydrogenase,nucleotide phosphate-binding region:NAD,	3	1422	0.0021097
STM14_2885	GJ0703GL001608	STY2570	transketolase subunit(STY2570)	S. Typhi str. CT18	Carbohydrate transport and metabolism,	GO:0008152~metabolic process,		GO:0003824~catalytic activity,	IPR005475:Transketolase-like, pyrimidine-binding domain,IPR009014:Transketolase, C-terminal/Pyruvate-ferredoxin oxidoreductase, domain II,	sty00030:Pentose phosphate pathway,sty01100:Metabolic pathways,sty01110:Biosynthesis of secondary metabolites,sty01120:Microbial metabolism in diverse environments,sty01130:Biosynthesis of antibiotics,sty01200:Carbon metabolism,sty01230:Biosynthesis of amino acids,		SM00861:SM00861,	Complete proteome,	Carbohydrate transport and metabolism		2	951	0.00210305
STM14_4487	GJ0703GL000122	STY4069	phosphopantetheine adenylyltransferase(coaD)	S. Typhi str. CT18	Coenzyme metabolism,	GO:0015937~coenzyme A biosynthetic process,	GO:0005737~cytoplasm,	GO:0004595~pantetheine-phosphate adenylyltransferase activity,GO:0005524~ATP binding,	IPR001980:Coenzyme A biosynthesis protein,IPR004821:Cytidyltransferase-like domain,IPR014729:Rossmann-like alpha/beta/alpha sandwich fold,	sty00770:Pantothenate and CoA biosynthesis,sty01100:Metabolic pathways,			ATP-binding,Coenzyme A biosynthesis,Complete proteome,Cytoplasm,Nucleotide-binding,Nucleotidyltransferase,Transferase,	Coenzyme metabolism	chain:Phosphopantetheine adenylyltransferase,	1	477	0.00209644
STM14_3231	GJ0703GL001314	STY2830	sigma-E factor regulatory protein RseC(STY2830)	S. Typhi str. CT18			GO:0016021~integral component of membrane,		IPR007359:Positive regulator of sigma(E), RseC/MucC,IPR026268:Protein RseC,		PIRSF004923:protein RseC,		Complete proteome,Membrane,Transmembrane,Transmembrane helix,	Signal transduction mechanisms		1	477	0.00209644
STM14_0692	GJ0703GL003326	STY0638	ferric enterobactin ABC transporter substrate-binding protein(STY0638)	S. Typhi str. CT18					IPR002491:ABC transporter periplasmic binding domain,	sty02010:ABC transporters,			Complete proteome,Signal,	Inorganic ion transport and metabolism	signal peptide,	2	954	0.00209644
STM14_3232	GJ0703GL001313	STY2831	sigma-E factor regulatory protein RseB(STY2831)	S. Typhi str. CT18					IPR005588:MucB/RseB,		PIRSF005427:sigma-E factor regulatory protein RseB,		Complete proteome,Signal,	Signal transduction mechanisms	signal peptide,	2	954	0.00209644
STM14_1612	GJ0703GL002667	STY1783	outer membrane protein(STY1783)	S. Typhi str. CT18					IPR018707:Protein of unknown function DUF2219,				Complete proteome,Signal,	Function unknown		2	957	0.00208986
STM14_3476	GJ0703GL001091	STY3000	cell invasion protein(iagB)	S. Typhi str. CT18		GO:0009405~pathogenesis,			IPR008258:Lytic transglycosylase-like, catalytic,IPR023346:Lysozyme-like domain,				Complete proteome,Signal,Virulence,	Cell envelope biogenesis, outer membrane	chain:Invasion protein iagB,signal peptide,	1	480	0.00208333
STM14_2844	GJ0703GL001646	STY2536	O-succinylbenzoate-CoA synthase(menC)	S. Typhi str. CT18		GO:0009234~menaquinone biosynthetic process,		GO:0000287~magnesium ion binding,GO:0016836~hydro-lyase activity,	IPR001354:Mandelate racemase/muconate lactonizing enzyme,IPR010196:O-succinylbenzoic acid (OSB) synthetase,IPR010197:O-succinylbenzoic acid (OSB) synthetase, low GC Gram-positive bacteria/archaea,IPR013342:Mandelate racemase/muconate lactonizing enzyme, C-terminal,	sty00130:Ubiquinone and other terpenoid-quinone biosynthesis,sty01100:Metabolic pathways,sty01110:Biosynthesis of secondary metabolites,		SM00922:SM00922,	Complete proteome,Lyase,Magnesium,Menaquinone biosynthesis,Metal-binding,	Coenzyme metabolism	active site:Proton acceptor,active site:Proton donor,chain:o-succinylbenzoate synthase,helix,metal ion-binding site:Magnesium,strand,turn,	2	960	0.00208333
STM14_3429	GJ0703GL001133	STY2960	phosphosugar binding protein(STY2960)	S. Typhi str. CT18		GO:0019294~keto-3-deoxy-D-manno-octulosonic acid biosynthetic process,		GO:0005524~ATP binding,GO:0019146~arabinose-5-phosphate isomerase activity,GO:0030246~carbohydrate binding,GO:0046872~metal ion binding,	IPR000644:Cystathionine beta-synthase, core,IPR001347:Sugar isomerase (SIS),IPR004800:Phosphosugar isomerase, KdsD/KpsF-type,		PIRSF004692:phosphosugar isomerase, KdsD/KpsF type,		ATP-binding,CBS domain,Complete proteome,Isomerase,Lipopolysaccharide biosynthesis,Metal-binding,Nucleotide-binding,Repeat,Zinc,	Cell envelope biogenesis, outer membrane		2	963	0.00207684
STM14_0816	GJ0703GL003224	STY0737	5-nitroimidazole antibiotic resistance(STY0737)	S. Typhi str. CT18				GO:0010181~FMN binding,GO:0016491~oxidoreductase activity,	IPR012349:FMN-binding split barrel,IPR024747:Pyridoxamine 5'-phosphate oxidase-related,				Complete proteome,	General function prediction only		1	483	0.00207039
STM14_4547	GJ0703GL000071	STY4014	PTS system mannose/sorbose specific transporter subunit IIB(STY4014)	S. Typhi str. CT18		GO:0009401~phosphoenolpyruvate-dependent sugar phosphotransferase system,	GO:0005737~cytoplasm,	GO:0008982~protein-N(PI)-phosphohistidine-sugar phosphotransferase activity,	IPR004720:Phosphotransferase system, sorbose subfamily IIB component,	sty00030:Pentose phosphate pathway,sty01120:Microbial metabolism in diverse environments,sty02060:Phosphotransferase system (PTS),			Complete proteome,	Carbohydrate transport and metabolism		1	483	0.00207039
STM14_0069	GJ0703GL003909	STY0067	[citrate (pro-3S)-lyase] ligase(STY0067)	S. Typhi str. CT18	Energy production and conversion,	GO:0009058~biosynthetic process,		GO:0005524~ATP binding,GO:0008080~N-acetyltransferase activity,GO:0008771~[citrate (pro-3S)-lyase] ligase activity,GO:0016829~lyase activity,	IPR000182:GNAT domain,IPR004821:Cytidyltransferase-like domain,IPR005216:Citrate lyase ligase,IPR013166:Citrate lyase ligase, C-terminal,IPR014729:Rossmann-like alpha/beta/alpha sandwich fold,IPR016181:Acyl-CoA N-acyltransferase,	sty02020:Two-component system,	PIRSF005751:citrate lyase ligase,	SM00764:Citrate_ly_lig,	ATP-binding,Complete proteome,Ligase,Lyase,Nucleotide-binding,	Energy production and conversion		2	966	0.00207039
STM14_3386	GJ0703GL002066	STY2929	hypothetical protein(STY2929)	S. Typhi str. CT18									Complete proteome,	Cell envelope biogenesis, outer membrane		2	969	0.00206398
STM14_4274	GJ0703GL000371	STY4262	hypothetical protein(STY4262)	S. Typhi str. CT18			GO:0016021~integral component of membrane,		IPR006750:Protein of unknown function DUF606,IPR020846:Major facilitator superfamily domain,				Complete proteome,Membrane,Transmembrane,Transmembrane helix,	Function unknown		2	969	0.00206398
STM14_2609	GJ0703GL001844	STY2327	acetyltransferase(STY2327)	S. Typhi str. CT18		GO:0006535~cysteine biosynthetic process from serine,GO:0009103~lipopolysaccharide biosynthetic process,GO:0045228~slime layer polysaccharide biosynthetic process,	GO:0005737~cytoplasm,	GO:0009001~serine O-acetyltransferase activity,	IPR001451:Bacterial transferase hexapeptide repeat,IPR005881:Serine O-acetyltransferase,IPR011004:Trimeric LpxA-like,IPR018357:Hexapeptide transferase, conserved site,IPR024027:Colanic acid biosynthesis, acetyltransferase, WcaB,		PIRSF000441:serine acetyltransferase,		Acyltransferase,Complete proteome,Lipopolysaccharide biosynthesis,Transferase,	Amino acid transport and metabolism		1	486	0.00205761
STM14_2910	GJ0703GL001584	STY2593	colicin V production protein(STY2593)	S. Typhi str. CT18		GO:0009403~toxin biosynthetic process,	GO:0016021~integral component of membrane,		IPR003825:Colicin V production, CvpA,				Complete proteome,Membrane,Transmembrane,Transmembrane helix,	General function prediction only		1	486	0.00205761
STM14_3809	GJ0703GL000778	STY3316	hydrogenase-2 protein(STY3316)	S. Typhi str. CT18					IPR023994:[NiFe]-hydrogenase assembly, chaperone, HybE,				Complete proteome,			1	486	0.00205761
STM14_0499	GJ0703GL003508	STY0460	oxidoreductase(STY0460)	S. Typhi str. CT18				GO:0016491~oxidoreductase activity,	IPR001395:Aldo/keto reductase,IPR020471:Aldo/keto reductase subgroup,IPR023210:NADP-dependent oxidoreductase domain,				Complete proteome,	Energy production and conversion		2	972	0.00205761
STM14_1114	GJ0703GL002972	STY0986	tetraacyldisaccharide 4'-kinase(lpxK)	S. Typhi str. CT18		GO:0009245~lipid A biosynthetic process,		GO:0005524~ATP binding,GO:0009029~tetraacyldisaccharide 4'-kinase activity,	IPR003758:Tetraacyldisaccharide 4'-kinase,IPR027417:P-loop containing nucleoside triphosphate hydrolase,	sty00540:Lipopolysaccharide biosynthesis,sty01100:Metabolic pathways,			ATP-binding,Complete proteome,Kinase,Lipid A biosynthesis,Lipid biosynthesis,Lipid metabolism,Nucleotide-binding,Transferase,	Cell envelope biogenesis, outer membrane	chain:Tetraacyldisaccharide 4'-kinase,nucleotide phosphate-binding region:ATP,	2	975	0.00205128
STM14_3743	GJ0703GL000839	STY3252	type II secretion system ATP-binding protein(pilT)	S. Typhi str. CT18		GO:0006810~transport,		GO:0005524~ATP binding,	IPR001482:Type II secretion system protein E,IPR003593:AAA+ ATPase domain,IPR006321:Pilus retraction protein PilT,IPR027417:P-loop containing nucleoside triphosphate hydrolase,			SM00382:AAA,	ATP-binding,Complete proteome,Nucleotide-binding,	Cell motility and secretion / Intracellular trafficking and secretion		2	978	0.00204499
STM14_2573	GJ0703GL001870	STY2288	polysaccharide chain length regulator(cld)	S. Typhi str. CT18		GO:0009103~lipopolysaccharide biosynthetic process,	GO:0016021~integral component of membrane,		IPR003856:Lipopolysaccharide biosynthesis,				Complete proteome,Membrane,Transmembrane,Transmembrane helix,	Cell envelope biogenesis, outer membrane		2	981	0.00203874
STM14_0524	GJ0703GL003483	STY0486	muropeptide transporter AmpG(STY0486)	S. Typhi str. CT18		GO:0055085~transmembrane transport,	GO:0016021~integral component of membrane,		IPR004752:AmpG-like permease/Acetyl-coenzyme A transporter 1,IPR011701:Major facilitator superfamily,IPR020846:Major facilitator superfamily domain,	sty01501:beta-Lactam resistance,			Complete proteome,Membrane,Transmembrane,Transmembrane helix,	Carbohydrate transport and metabolism	signal peptide,	3	1479	0.0020284
STM14_0110	GJ0703GL003874	STY0106	pyridoxal phosphate biosynthetic protein PdxA(STY0106)	S. Typhi str. CT18		GO:0008615~pyridoxine biosynthetic process,GO:0042823~pyridoxal phosphate biosynthetic process,	GO:0005737~cytoplasm,	GO:0000287~magnesium ion binding,GO:0008270~zinc ion binding,GO:0050570~4-hydroxythreonine-4-phosphate dehydrogenase activity,GO:0050897~cobalt ion binding,GO:0051287~NAD binding,	IPR005255:4-hydroxythreonine-4-phosphate dehydrogenase PdxA,IPR024084:Isopropylmalate dehydrogenase-like domain,	sty00750:Vitamin B6 metabolism,sty01100:Metabolic pathways,			Cobalt,Complete proteome,Cytoplasm,Magnesium,Metal-binding,NAD,NADP,Oxidoreductase,Pyridoxine biosynthesis,Zinc,	Coenzyme metabolism	binding site:Substrate,chain:4-hydroxythreonine-4-phosphate dehydrogenase,chain:4-hydroxythreonine-4-phosphate dehydrogenase 1,chain:4-hydroxythreonine-4-phosphate dehydrogenase 2,helix,metal ion-binding site:Divalent metal cation; shared with dimeric partner,strand,turn,	2	987	0.00202634
STM14_5342	GJ0703GL004205	STY4790	anaerobic ribonucleoside-triphosphate reductase activating protein(nrdG)	S. Typhi str. CT18			GO:0005737~cytoplasm,	GO:0043365~[formate-C-acetyltransferase]-activating enzyme activity,GO:0046872~metal ion binding,GO:0051539~4 iron, 4 sulfur cluster binding,	IPR001989:Radical-activating enzyme, conserved site,IPR012837:Ribonucleoside-triphosphate reductase activating, anaerobic,IPR013785:Aldolase-type TIM barrel,		PIRSF000368:anaerobic ribonucleoside-triphosphate reductase class III, small subunit,		4Fe-4S,Complete proteome,Cytoplasm,Iron,Iron-sulfur,Metal-binding,Oxidoreductase,S-adenosyl-L-methionine,	Posttranslational modification, protein turnover, chaperones	chain:Anaerobic ribonucleoside-triphosphate reductase-activating protein,metal ion-binding site:Iron-sulfur (4Fe-4S-S-AdoMet),sequence conflict,	1	495	0.0020202
STM14_1708	GJ0703GL002586	STY1708	secretion system protein(ssaL)	S. Typhi str. CT18		GO:0009405~pathogenesis,GO:0046903~secretion,	GO:0019867~outer membrane,		IPR010812:Hypersensitivity response secretion-like, HrpJ,IPR013351:Type III secretion system effector delivery regulator TyeA-related,				Complete proteome,		chain:Secretion system apparatus protein ssaL,	2	990	0.0020202
STM14_3393	GJ0703GL001156	STY2937	glycine betaine-binding periplasmic protein(STY2937)	S. Typhi str. CT18				GO:0005215~transporter activity,	IPR007210:ABC-type glycine betaine transport system, substrate-binding domain,	sty02010:ABC transporters,			Complete proteome,Signal,	Amino acid transport and metabolism	signal peptide,	2	993	0.0020141
STM14_1689	GJ0703GL002603	STY1726	outer membrane secretory protein(spiA)	S. Typhi str. CT18		GO:0009306~protein secretion,	GO:0009279~cell outer membrane,	GO:0008565~protein transporter activity,	IPR003522:Type III secretion system outer membrane pore YscC/HrcC,IPR004845:Type II secretion system GspD, conserved site,IPR004846:Type II/III secretion system,IPR005644:NolW-like,	sty03070:Bacterial secretion system,			Complete proteome,Transport,	Cell motility and secretion / Intracellular trafficking and secretion		3	1491	0.00201207
STM14_5100	GJ0703GL004419	STY4439	tRNA-dihydrouridine synthase A(STY4439)	S. Typhi str. CT18	Translation, ribosomal structure and biogenesis,			GO:0000049~tRNA binding,GO:0010181~FMN binding,GO:0017150~tRNA dihydrouridine synthase activity,GO:0050660~flavin adenine dinucleotide binding,	IPR001269:tRNA-dihydrouridine synthase,IPR004653:tRNA-dihydrouridine synthase, TIM-barrel, YjbN,IPR013785:Aldolase-type TIM barrel,IPR018517:tRNA-dihydrouridine synthase, conserved site,		PIRSF006621:tRNA-dihydrouridine synthase,		Complete proteome,Flavoprotein,FMN,NADP,Oxidoreductase,RNA-binding,tRNA processing,tRNA-binding,	Translation, ribosomal structure and biogenesis	chain:tRNA-dihydrouridine synthase A,	2	996	0.00200803
STM14_1049	GJ0703GL003040	STY0930	L-allo-threonine aldolase(ybjU)	S. Typhi str. CT18		GO:0006520~cellular amino acid metabolic process,		GO:0016829~lyase activity,	IPR001597:Aromatic amino acid beta-eliminating lyase/threonine aldolase,IPR015421:Pyridoxal phosphate-dependent transferase, major region, subdomain 1,IPR015422:Pyridoxal phosphate-dependent transferase, major region, subdomain 2,IPR015424:Pyridoxal phosphate-dependent transferase,IPR023603:Threonine aldolase,	sty00260:Glycine, serine and threonine metabolism,sty01100:Metabolic pathways,sty01110:Biosynthesis of secondary metabolites,sty01120:Microbial metabolism in diverse environments,sty01130:Biosynthesis of antibiotics,sty01230:Biosynthesis of amino acids,	PIRSF017617:threonine aldolase,		Complete proteome,Lyase,	Amino acid transport and metabolism		2	999	0.002002
STM14_3095	GJ0703GL001377	STY2769	DNA-binding protein(STY2769)	S. Typhi str. CT18		GO:0008360~regulation of cell shape,	GO:0005886~plasma membrane,GO:0016021~integral component of membrane,	GO:0043565~sequence-specific DNA binding,	IPR001387:Helix-turn-helix,IPR010982:Lambda repressor-like, DNA-binding domain,IPR023690:Cytoskeleton protein RodZ,IPR025194:Domain of unknown function DUF4115,			SM00530:HTH_XRE,	Cell inner membrane,Cell membrane,Cell shape,Complete proteome,DNA-binding,Membrane,Signal-anchor,Transmembrane,Transmembrane helix,	Function unknown	chain:Cytoskeleton protein rodZ,DNA-binding region:H-T-H motif,domain:HTH cro/C1-type,topological domain:Cytoplasmic,topological domain:Periplasmic,transmembrane region,	2	1002	0.00199601
STM14_4956	GJ0703GL004533	STY3752	N-acetyl-gamma-glutamyl-phosphate reductase(STY3752)	S. Typhi str. CT18		GO:0006526~arginine biosynthetic process,	GO:0005737~cytoplasm,	GO:0003942~N-acetyl-gamma-glutamyl-phosphate reductase activity,GO:0051287~NAD binding,	IPR000534:Semialdehyde dehydrogenase, NAD-binding,IPR000706:N-acetyl-gamma-glutamyl-phosphate reductase, type 1,IPR012280:Semialdehyde dehydrogenase, dimerisation domain,IPR016040:NAD(P)-binding domain,IPR023013:N-acetyl-gamma-glutamyl-phosphate reductase, active site,	sty00220:Arginine biosynthesis,sty01100:Metabolic pathways,sty01110:Biosynthesis of secondary metabolites,sty01130:Biosynthesis of antibiotics,sty01210:2-Oxocarboxylic acid metabolism,sty01230:Biosynthesis of amino acids,		SM00859:SM00859,	Amino-acid biosynthesis,Arginine biosynthesis,Complete proteome,Cytoplasm,NADP,Oxidoreductase,	Amino acid transport and metabolism	chain:N-acetyl-gamma-glutamyl-phosphate reductase,helix,strand,turn,	2	1002	0.00199601
STM14_0639	GJ0703GL003377	STY0594	fimbriae protein FimH(fimH)	S. Typhi str. CT18		GO:0007155~cell adhesion,	GO:0009289~pilus,		IPR000259:Fimbrial-type adhesion domain,IPR008966:Adhesion domain,				Complete proteome,Signal,	Cell motility and secretion / Intracellular trafficking and secretion	chain:Protein fimH,sequence conflict,signal peptide,	2	1005	0.00199005
STM14_4572	GJ0703GL000050	STY3991	deoxyribose mutarotase(STY3991)	S. Typhi str. CT18		GO:0005975~carbohydrate metabolic process,		GO:0003824~catalytic activity,GO:0030246~carbohydrate binding,	IPR011013:Galactose mutarotase-like domain,				Complete proteome,			2	1011	0.00197824
STM14_4479	GJ0703GL000131	STY4077	lipopolysaccharide 1,3-galactosyltransferase(waaI)	S. Typhi str. CT18	Cell envelope biogenesis, outer membrane,			GO:0008918~lipopolysaccharide 3-alpha-galactosyltransferase activity,	IPR002495:Glycosyl transferase, family 8,IPR013645:Glycosyl transferase, family 8, C-terminal,	sty00540:Lipopolysaccharide biosynthesis,sty01100:Metabolic pathways,			Complete proteome,Glycosyltransferase,Transferase,	Cell envelope biogenesis, outer membrane		2	1011	0.00197824
STM14_3024	GJ0703GL001438	STY2702	phosphate acyltransferase(eutD)	S. Typhi str. CT18		GO:0008152~metabolic process,		GO:0016407~acetyltransferase activity,	IPR002505:Phosphate acetyl/butaryl transferase,IPR004614:Phosphate acetyltransferase,IPR012147:Phosphate acetyl/butyryltransferase,	sty00620:Pyruvate metabolism,sty01100:Metabolic pathways,	PIRSF000428:phosphate acetyltransferase,		Acyltransferase,Complete proteome,Transferase,	Energy production and conversion	chain:Ethanolamine utilization protein eutD,sequence conflict,	2	1014	0.00197239
STM14_4832	GJ0703GL004644	STY3859	glycosyl hydrolase(STY3859)	S. Typhi str. CT18	Carbohydrate transport and metabolism,	GO:0005975~carbohydrate metabolic process,		GO:0004553~hydrolase activity, hydrolyzing O-glycosyl compounds,GO:0030246~carbohydrate binding,	IPR000322:Glycoside hydrolase, family 31,IPR011013:Galactose mutarotase-like domain,IPR017853:Glycoside hydrolase, superfamily,	sty00052:Galactose metabolism,sty00500:Starch and sucrose metabolism,sty01100:Metabolic pathways,			Complete proteome,Glycosidase,Hydrolase,	Carbohydrate transport and metabolism		4	2034	0.00196657
STM14_1739	GJ0703GL002559	STY1681	fusaric acid resistance protein(STY1681)	S. Typhi str. CT18	Function unknown,	GO:0006810~transport,	GO:0005886~plasma membrane,GO:0016021~integral component of membrane,		IPR006726:Para-hydroxybenzoic acid efflux pump subunit AaeB/fusaric acid resistance protein,				Cell membrane,Complete proteome,Membrane,Transmembrane,Transmembrane helix,Transport,	Function unknown	chain:Uncharacterized transporter ydhK,transmembrane region,	4	2037	0.00196367
STM14_5098	GJ0703GL004421	STY4437	zinc uptake regulation protein(zur)	S. Typhi str. CT18				GO:0003677~DNA binding,GO:0003700~transcription factor activity, sequence-specific DNA binding,	IPR002481:Ferric-uptake regulator,IPR011991:Winged helix-turn-helix DNA-binding domain,				Complete proteome,DNA-binding,	Inorganic ion transport and metabolism		1	513	0.00194932
STM14_4973	GJ0703GL004523	STY3742	UDP-N-acetylenolpyruvoylglucosamine reductase(STY3742)	S. Typhi str. CT18		GO:0007049~cell cycle,GO:0008360~regulation of cell shape,GO:0009252~peptidoglycan biosynthetic process,GO:0051301~cell division,GO:0071555~cell wall organization,	GO:0005737~cytoplasm,	GO:0008762~UDP-N-acetylmuramate dehydrogenase activity,GO:0050660~flavin adenine dinucleotide binding,	IPR003170:UDP-N-acetylenolpyruvoylglucosamine reductase,IPR006094:FAD linked oxidase, N-terminal,IPR011601:UDP-N-acetylenolpyruvoylglucosamine reductase, C-terminal,IPR016166:FAD-binding, type 2,IPR016167:FAD-binding, type 2, subdomain 1,IPR016169:CO dehydrogenase flavoprotein-like, FAD-binding, subdomain 2,	sty00520:Amino sugar and nucleotide sugar metabolism,sty00550:Peptidoglycan biosynthesis,sty01100:Metabolic pathways,			Cell cycle,Cell division,Cell shape,Cell wall biogenesis/degradation,Complete proteome,Cytoplasm,FAD,Flavoprotein,NADP,Oxidoreductase,Peptidoglycan synthesis,	Cell envelope biogenesis, outer membrane	active site:Proton donor,chain:UDP-N-acetylenolpyruvoylglucosamine reductase,domain:FAD-binding PCMH-type,	2	1026	0.00194932
STM14_0289	GJ0703GL003692	STY0274	ABC transporter ATP-binding protein(STY0274)	S. Typhi str. CT18			GO:0009276~Gram-negative-bacterium-type cell wall,GO:0043190~ATP-binding cassette (ABC) transporter complex,	GO:0005524~ATP binding,GO:0015424~amino acid-transporting ATPase activity,GO:0048474~D-methionine transmembrane transporter activity,	IPR003439:ABC transporter-like,IPR003593:AAA+ ATPase domain,IPR012692:ABC transporter, methionine import, ATP-binding protein MetN, proteobacteria,IPR017871:ABC transporter, conserved site,IPR017908:ABC transporter, methionine import, ATP-binding protein, MetN, C-terminal,IPR018449:NIL domain,IPR026253:ABC transporter, methionine import, ATP-binding protein MetN,IPR027417:P-loop containing nucleo…	sty02010:ABC transporters,		SM00382:AAA,SM00930:SM00930,	Amino-acid transport,ATP-binding,Cell inner membrane,Cell membrane,Complete proteome,Hydrolase,Membrane,Nucleotide-binding,Transport,	Inorganic ion transport and metabolism	chain:Methionine import ATP-binding protein metN 1,domain:ABC transporter,nucleotide phosphate-binding region:ATP,	2	1029	0.00194363
STM14_2925	GJ0703GL001573	STY2607	lipoprotein(STY2607)	S. Typhi str. CT18					IPR024289:Domain of unknown function DUF3828,				Complete proteome,Lipoprotein,Signal,			1	516	0.00193798
STM14_938	GJ0703GL003131	STY0843	hypothetical protein(STY0843)	S. Typhi str. CT18			GO:0016021~integral component of membrane,						Complete proteome,Membrane,Transmembrane,Transmembrane helix,	General function prediction only		1	519	0.00192678
STM14_4891	GJ0703GL004583	STY3803	hypothetical protein(STY3803)	S. Typhi str. CT18				GO:0016787~hydrolase activity,	IPR005502:ADP-ribosylation/Crystallin J1,				Complete proteome,Hydrolase,	Posttranslational modification, protein turnover, chaperones		2	1038	0.00192678
STM14_2625	GJ0703GL001828	STY2340	RND-family transporter protein(STY2340)	S. Typhi str. CT18			GO:0005886~plasma membrane,GO:0016021~integral component of membrane,	GO:0005215~transporter activity,	IPR001036:Acriflavin resistance protein,IPR022831:Multidrug resistance protein MdtB,IPR027463:Multidrug efflux transporter AcrB TolC docking domain, DN/DC subdomains,	sty02020:Two-component system,			Cell inner membrane,Cell membrane,Complete proteome,Membrane,Transmembrane,Transmembrane helix,Transport,	Defense mechanisms	chain:Multidrug resistance protein mdtB,transmembrane region,	6	3120	0.00192308
STM14_1324	GJ0703GL002848	STY1193	rhodanese-related sulfurtransferase(STY1193)	S. Typhi str. CT18					IPR001763:Rhodanese-like domain,IPR020936:Uncharacterised protein family UPF0176,IPR022111:Protein of unknown function DUF3650,			SM00450:RHOD,	Complete proteome,	General function prediction only	chain:UPF0176 protein yceA,domain:Rhodanese,	2	1050	0.00190476
STM14_0222	GJ0703GL003754	STY0213	2'-5' RNA ligase(ligT)	S. Typhi str. CT18	Translation, ribosomal structure and biogenesis,			GO:0004113~2',3'-cyclic-nucleotide 3'-phosphodiesterase activity,GO:0008664~2'-5'-RNA ligase activity,	IPR004175:2',5' RNA ligase,IPR009097:RNA ligase/cyclic nucleotide phosphodiesterase,IPR014051:Phosphoesterase, HXTX,				Complete proteome,Hydrolase,Ligase,	Translation, ribosomal structure and biogenesis		1	528	0.00189394
STM14_2034	GJ0703GL002282	STY1377	hypothetical protein(STY1377)	S. Typhi str. CT18			GO:0005886~plasma membrane,GO:0016021~integral component of membrane,		IPR006507:Uncharacterised protein family UPF0283,IPR021147:Protein of unknown function DUF697,				Cell inner membrane,Cell membrane,Complete proteome,Membrane,Transmembrane,Transmembrane helix,	Function unknown	chain:UPF0283 membrane protein ycjF,topological domain:Cytoplasmic,topological domain:Periplasmic,transmembrane region,	2	1059	0.00188857
STM14_5219	GJ0703GL004316	STY4699	lipoprotein(blc)	S. Typhi str. CT18				GO:0005215~transporter activity,	IPR000566:Lipocalin/cytosolic fatty-acid binding protein domain,IPR002446:Lipocalin, bacterial,IPR011038:Calycin-like,IPR012674:Calycin,IPR022271:Lipocalin, ApoD type,IPR022272:Lipocalin conserved site,		PIRSF036893:lipocalin, ApoD type,		Complete proteome,Lipoprotein,Signal,	Cell envelope biogenesis, outer membrane	signal peptide,	1	531	0.00188324
STM14_5008	GJ0703GL004498	STY3718	uroporphyrinogen decarboxylase(STY3718)	S. Typhi str. CT18		GO:0006782~protoporphyrinogen IX biosynthetic process,	GO:0005737~cytoplasm,	GO:0004853~uroporphyrinogen decarboxylase activity,	IPR000257:Uroporphyrinogen decarboxylase (URO-D),IPR006361:Uroporphyrinogen decarboxylase HemE,	sty00860:Porphyrin and chlorophyll metabolism,sty01100:Metabolic pathways,sty01110:Biosynthesis of secondary metabolites,			Complete proteome,Cytoplasm,Decarboxylase,Lyase,Porphyrin biosynthesis,	Coenzyme metabolism	binding site:Substrate,chain:Uroporphyrinogen decarboxylase,region of interest:Substrate binding,site:Transition state stabilizer,	2	1062	0.00188324
STM14_2504	GJ0703GL001935	STY2219	nicotinate-nucleotide--dimethylbenzimidazole phosphoribosyl transferase(STY2219)	S. Typhi str. CT18		GO:0009163~nucleoside biosynthetic process,GO:0009236~cobalamin biosynthetic process,		GO:0008939~nicotinate-nucleotide-dimethylbenzimidazole phosphoribosyltransferase activity,GO:0015420~cobalamin-transporting ATPase activity,	IPR003200:Nicotinate-nucleotide-dimethylbenzimidazole phosphoribosyltransferase-like,IPR017846:Nicotinate-nucleotide-dimethylbenzimidazole phosphoribosyltransferase, prokaryotic,IPR023195:Nicotinate-nucleotide-dimethylbenzimidazole phosphoribosyltransferase, N-terminal,	sty00860:Porphyrin and chlorophyll metabolism,sty01100:Metabolic pathways,			Cobalamin biosynthesis,Complete proteome,Glycosyltransferase,Transferase,	Coenzyme metabolism	active site:Proton acceptor,chain:Nicotinate-nucleotide-- dimethylbenzimidazole phosphoribosyltransferase,disulfide bond,helix,sequence conflict,strand,turn,	2	1068	0.00187266
STM14_3486	GJ0703GL001081	STY3010	secretory protein(spaS)	S. Typhi str. CT18		GO:0009306~protein secretion,	GO:0016021~integral component of membrane,		IPR006135:Type III secretion system substrate exporter,IPR006307:Type III secretion system, flagellar biosynthetic protein, EscU,	sty03070:Bacterial secretion system,			Complete proteome,Membrane,Transmembrane,Transmembrane helix,	Cell motility and secretion / Intracellular trafficking and secretion	chain:Surface presentation of antigens protein spaS,helix,strand,transmembrane region,	2	1068	0.00187266
STM14_5482	GJ0703GL004009	STY4914	hypothetical protein(STY4914)	S. Typhi str. CT18		GO:0006629~lipid metabolic process,			IPR002641:Patatin/Phospholipase A2-related,IPR016035:Acyl transferase/acyl hydrolase/lysophospholipase,				Complete proteome,	General function prediction only		2	1071	0.00186741
STM14_0694	GJ0703GL003324	STY0640	(2,3-dihydroxybenzoyl)adenylate synthase(STY0640)	S. Typhi str. CT18		GO:0019290~siderophore biosynthetic process,		GO:0008668~(2,3-dihydroxybenzoyl)adenylate synthase activity,GO:0016874~ligase activity,	IPR000873:AMP-dependent synthetase/ligase,IPR011963:2,3-dihydroxybenzoate-AMP ligase,IPR020845:AMP-binding, conserved site,IPR025110:Domain of unknown function DUF4009,	sty01053:Biosynthesis of siderophore group nonribosomal peptides,			Complete proteome,Ligase,	Secondary metabolites biosynthesis, transport, and catabolism		3	1608	0.00186567
STM14_4400	GJ0703GL000202	STY4152	hypothetical protein(STY4152)	S. Typhi str. CT18									Complete proteome,Signal,			1	537	0.0018622
STM14_4203	GJ0703GL000429	STY4305	hypothetical protein(yrfC)	S. Typhi str. CT18			GO:0016021~integral component of membrane,		IPR007813:Fimbrial assembly PilN,				Complete proteome,Membrane,Transmembrane,Transmembrane helix,	Cell motility and secretion / Intracellular trafficking and secretion		1	537	0.0018622
STM14_0490	GJ0703GL003516	STY0452	lipoprotein(STY0452)	S. Typhi str. CT18					IPR021658:Domain of unknown function DUF3251,				Coiled coil,Complete proteome,Lipoprotein,Signal,		signal peptide,	1	537	0.0018622
STM14_3416	GJ0703GL001143	STY2949	regulatory protein RecX(STY2949)	S. Typhi str. CT18		GO:0006282~regulation of DNA repair,	GO:0005737~cytoplasm,		IPR003783:Regulatory protein RecX,IPR011991:Winged helix-turn-helix DNA-binding domain,				Complete proteome,Cytoplasm,	General function prediction only	chain:Regulatory protein recX,	1	537	0.0018622
STM14_1949	GJ0703GL002379	STY1453	ribosomal-protein-serine acetyltransferase(STY1453)	S. Typhi str. CT18	Translation, ribosomal structure and biogenesis,			GO:0008080~N-acetyltransferase activity,	IPR000182:GNAT domain,IPR016181:Acyl-CoA N-acyltransferase,				Complete proteome,Transferase,	Translation, ribosomal structure and biogenesis		1	537	0.0018622
STM14_2567	GJ0703GL001876	STY2282	histidinol-phosphate aminotransferase(STY2282)	S. Typhi str. CT18		GO:0000105~histidine biosynthetic process,		GO:0004400~histidinol-phosphate transaminase activity,GO:0030170~pyridoxal phosphate binding,GO:0080130~L-phenylalanine:2-oxoglutarate aminotransferase activity,	IPR001917:Aminotransferase, class-II, pyridoxal-phosphate binding site,IPR004839:Aminotransferase, class I/classII,IPR005861:Histidinol-phosphate aminotransferase family,IPR015421:Pyridoxal phosphate-dependent transferase, major region, subdomain 1,IPR015422:Pyridoxal phosphate-dependent transferase, major region, subdomain 2,IPR015424:Pyridoxal phosphate-dependent transferase,	sty00340:Histidine metabolism,sty00350:Tyrosine metabolism,sty00360:Phenylalanine metabolism,sty00400:Phenylalanine, tyrosine and tryptophan biosynthesis,sty00401:Novobiocin biosynthesis,sty01100:Metabolic pathways,sty01110:Biosynthesis of secondary metabolites,sty01130:Biosynthesis of antibiotics,sty01230:Biosynthesis of amino acids,			Amino-acid biosynthesis,Aminotransferase,Complete proteome,Histidine biosynthesis,Pyridoxal phosphate,Transferase,	Amino acid transport and metabolism	chain:Histidinol-phosphate aminotransferase,modified residue,sequence conflict,	2	1077	0.00185701
STM14_4480	GJ0703GL000130	STY4076	lipopolysaccharide 1,6-galactosyltransferase(waaB)	S. Typhi str. CT18				GO:0016757~transferase activity, transferring glycosyl groups,	IPR001296:Glycosyl transferase, family 1,	sty00540:Lipopolysaccharide biosynthesis,sty01100:Metabolic pathways,			Complete proteome,Glycosyltransferase,Transferase,	Cell envelope biogenesis, outer membrane		2	1077	0.00185701
STM14_2933	GJ0703GL001565	STY2616	chorismate synthase(STY2616)	S. Typhi str. CT18		GO:0008652~cellular amino acid biosynthetic process,GO:0009073~aromatic amino acid family biosynthetic process,GO:0009423~chorismate biosynthetic process,		GO:0004107~chorismate synthase activity,	IPR000453:Chorismate synthase,IPR020541:Chorismate synthase, conserved site,	sty00400:Phenylalanine, tyrosine and tryptophan biosynthesis,sty01100:Metabolic pathways,sty01110:Biosynthesis of secondary metabolites,sty01130:Biosynthesis of antibiotics,sty01230:Biosynthesis of amino acids,	PIRSF001456:chorismate synthase,		Amino-acid biosynthesis,Aromatic amino acid biosynthesis,Complete proteome,FAD,Flavoprotein,FMN,Lyase,NADP,	Amino acid transport and metabolism	chain:Chorismate synthase,sequence conflict,	2	1083	0.00184672
STM14_0630	GJ0703GL003384	STY0586	metal-dependent hydrolase(STY0586)	S. Typhi str. CT18			GO:0016021~integral component of membrane,		IPR007404:Protein of unknown function DUF457,				Complete proteome,Membrane,Transmembrane,Transmembrane helix,	General function prediction only		1	543	0.00184162
STM14_4793	GJ0703GL004669	STY3573	protoporphyrinogen oxidase(STY3573)	S. Typhi str. CT18				GO:0009055~electron carrier activity,GO:0010181~FMN binding,	IPR001226:Flavodoxin, conserved site,IPR008254:Flavodoxin/nitric oxide synthase,IPR026816:Flavodoxin domain,	sty00860:Porphyrin and chlorophyll metabolism,sty01100:Metabolic pathways,sty01110:Biosynthesis of secondary metabolites,			Complete proteome,	Energy production and conversion / Coenzyme metabolism	chain:Protoporphyrinogen oxidase,domain:Flavodoxin-like,	1	543	0.00184162
STM14_1105	GJ0703GL002981	STY0977	3-phosphoserine/phosphohydroxythreonine aminotransferase(STY0977)	S. Typhi str. CT18		GO:0006564~L-serine biosynthetic process,GO:0008615~pyridoxine biosynthetic process,	GO:0005737~cytoplasm,	GO:0004648~O-phospho-L-serine:2-oxoglutarate aminotransferase activity,GO:0030170~pyridoxal phosphate binding,	IPR000192:Aminotransferase, class V/Cysteine desulfurase,IPR015421:Pyridoxal phosphate-dependent transferase, major region, subdomain 1,IPR015422:Pyridoxal phosphate-dependent transferase, major region, subdomain 2,IPR015424:Pyridoxal phosphate-dependent transferase,IPR020578:Aminotransferase class-V pyridoxal-phosphate binding site,IPR022278:Phosphoserine aminotransferase,	sty00260:Glycine, serine and threonine metabolism,sty00680:Methane metabolism,sty00750:Vitamin B6 metabolism,sty01100:Metabolic pathways,sty01120:Microbial metabolism in diverse environments,sty01130:Biosynthesis of antibiotics,sty01200:Carbon metabolism,sty01230:Biosynthesis of amino acids,	PIRSF000525:phosphoserine aminotransferase,		Amino-acid biosynthesis,Aminotransferase,Complete proteome,Cytoplasm,Pyridoxal phosphate,Pyridoxine biosynthesis,Serine biosynthesis,Transferase,	Coenzyme metabolism / Amino acid transport and metabolism	binding site:L-glutamate,binding site:Pyridoxal phosphate,chain:Phosphoserine aminotransferase,modified residue,region of interest:Pyridoxal phosphate binding,sequence conflict,	2	1086	0.00184162
STM14_1571	GJ0703GL002703	STY1820	L-asparaginase I(STY1820)	S. Typhi str. CT18		GO:0006520~cellular amino acid metabolic process,		GO:0004067~asparaginase activity,	IPR006033:L-asparaginase, type I,IPR006034:Asparaginase/glutaminase,IPR020827:Asparaginase/glutaminase, active site 1,IPR027473:L-asparaginase, C-terminal domain,IPR027474:L-asparaginase, N-terminal,IPR027475:Asparaginase/glutaminase, active site 2,	sty00250:Alanine, aspartate and glutamate metabolism,sty00460:Cyanoamino acid metabolism,sty01100:Metabolic pathways,sty01110:Biosynthesis of secondary metabolites,	PIRSF001220:L-asparaginase/Glutamyl-tRNA(Gln) amidotransferase subunit D,	SM00870:SM00870,	Complete proteome,Hydrolase,	Amino acid transport and metabolism / Translation, ribosomal structure and biogenesis		2	1086	0.00184162
STM14_0721	GJ0703GL003299	STY0669	apo-citrate lyase phosphoribosyl-dephospho-CoA transferase(STY0669)	S. Typhi str. CT18						sty02020:Two-component system,				Coenzyme metabolism / Lipid metabolism		1	549	0.00182149
STM14_0556	GJ0703GL003454	STY0515	maltose O-acetyltransferase(maA)	S. Typhi str. CT18				GO:0008925~maltose O-acetyltransferase activity,	IPR001451:Bacterial transferase hexapeptide repeat,IPR011004:Trimeric LpxA-like,IPR018357:Hexapeptide transferase, conserved site,IPR024688:Maltose/galactoside acetyltransferase,			SM01266:SM01266,	Acyltransferase,Complete proteome,Transferase,	General function prediction only		1	549	0.00182149
STM14_4857	GJ0703GL004617	STY3836	lipoprotein(STY3836)	S. Typhi str. CT18					IPR024291:Protein of unknown function DUF3829,				Complete proteome,Lipoprotein,Signal,			2	1098	0.00182149
STM14_2543	GJ0703GL001897	STY2259	propanediol utilization protein PduT(pduT)	S. Typhi str. CT18					IPR000249:Microcompartment protein, bacteria,IPR011238:Polyhedral organelle shell protein PduT,		PIRSF034834:polyhedral organelle shell protein, PduT type,	SM00877:SM00877,	Complete proteome,	Secondary metabolites biosynthesis, transport, and catabolism / Energy production and conversion		1	552	0.00181159
STM14_0063	GJ0703GL003914	STY0062	sensor kinase Cita(citA)	S. Typhi str. CT18	Signal transduction mechanisms,		GO:0005622~intracellular,GO:0016021~integral component of membrane,	GO:0000155~phosphorelay sensor kinase activity,GO:0005524~ATP binding,	IPR000014:PAS domain,IPR003594:Histidine kinase-like ATPase, ATP-binding domain,IPR003661:Signal transduction histidine kinase, subgroup 1, dimerisation/phosphoacceptor domain,IPR004358:Signal transduction histidine kinase-related protein, C-terminal,IPR005467:Signal transduction histidine kinase, core,IPR016120:Signal transduction histidine kinase, sporulation regulator SpoOB,	sty02020:Two-component system,		SM00091:PAS,SM00387:HATPase_c,	ATP-binding,Complete proteome,Kinase,Membrane,Nucleotide-binding,Transferase,Transmembrane,Transmembrane helix,	Signal transduction mechanisms	chain:Citrate-proton symporter,topological domain:Cytoplasmic,topological domain:Extracellular,transmembrane region,	3	1656	0.00181159
STM14_1203	GJ0703GL002945	STY1081	MOSC domain-containing protein(STY1081)	S. Typhi str. CT18	General function prediction only,			GO:0003824~catalytic activity,GO:0009055~electron carrier activity,GO:0030151~molybdenum ion binding,GO:0030170~pyridoxal phosphate binding,GO:0051536~iron-sulfur cluster binding,	IPR001041:2Fe-2S ferredoxin-type domain,IPR005302:Molybdenum cofactor sulfurase, C-terminal,IPR005303:MOSC, N-terminal beta barrel,IPR011037:Pyruvate kinase-like, insert domain,IPR012675:Beta-grasp domain,				Complete proteome,	General function prediction only		2	1107	0.00180668
STM14_0661	GJ0703GL003355	STY0614	hypothetical protein(STY0614)	S. Typhi str. CT18			GO:0016021~integral component of membrane,		IPR007339:Protein of unknown function DUF417,				Complete proteome,Membrane,Transmembrane,Transmembrane helix,	Function unknown		1	558	0.00179211
STM14_0709	GJ0703GL003310	STY0658	hypothetical protein(STY0658)	S. Typhi str. CT18					IPR020945:DMSO/Nitrate reductase chaperone,				Complete proteome,	General function prediction only		1	558	0.00179211
STM14_1333	GJ0703GL002839	STY1202	hypothetical protein(STY1202)	S. Typhi str. CT18					IPR010835:Protein of unknown function DUF1439,				Complete proteome,		chain:Uncharacterized lipoprotein yceB,lipid moiety-binding region:N-palmitoyl cysteine,lipid moiety-binding region:S-diacylglycerol cysteine,signal peptide,	1	558	0.00179211
STM14_0680	GJ0703GL003337	STY0626	gamma-glutamyl:cysteine ligase(STY0626)	S. Typhi str. CT18		GO:0042398~cellular modified amino acid biosynthetic process,		GO:0004357~glutamate-cysteine ligase activity,GO:0005524~ATP binding,	IPR006336:Glutamate--cysteine ligase, GCS2,IPR011793:Carboxylate-amine ligase, predicted,				ATP-binding,Complete proteome,Ligase,Nucleotide-binding,	Function unknown	chain:Carboxylate-amine ligase ybdK,sequence conflict,	2	1116	0.00179211
STM14_1951	GJ0703GL002378	STY1452	hypothetical protein(STY1452)	S. Typhi str. CT18				GO:0004177~aminopeptidase activity,GO:0008237~metallopeptidase activity,GO:0046872~metal ion binding,	IPR008007:Peptidase M42,IPR023367:Peptidase M42, domain 2,		PIRSF001123:glutamyl aminopeptidase, PepA type,		Aminopeptidase,Complete proteome,Hydrolase,Metal-binding,Metalloprotease,Protease,	Carbohydrate transport and metabolism	active site:Proton acceptor,chain:Putative aminopeptidase sgcX,metal ion-binding site:Divalent metal cation 1,metal ion-binding site:Divalent metal cation 2,	2	1116	0.00179211
STM14_0579	GJ0703GL003433	STY0536	cation:proton antiport protein(STY0536)	S. Typhi str. CT18		GO:0006813~potassium ion transport,	GO:0016021~integral component of membrane,	GO:0015299~solute:proton antiporter activity,	IPR003148:Regulator of K+ conductance, N-terminal,IPR004771:K+/H+ exchanger,IPR006153:Cation/H+ exchanger,IPR016040:NAD(P)-binding domain,				Complete proteome,	Inorganic ion transport and metabolism		3	1674	0.00179211
STM14_1744	GJ0703GL002554	STY1676	anhydro-N-acetylmuramic acid kinase(STY1676)	S. Typhi str. CT18		GO:0005975~carbohydrate metabolic process,GO:0006040~amino sugar metabolic process,GO:0009254~peptidoglycan turnover,GO:0097175~1,6-anhydro-N-acetyl-beta-muramic acid catabolic process,		GO:0005524~ATP binding,GO:0016301~kinase activity,GO:0016773~phosphotransferase activity, alcohol group as acceptor,	IPR005338:Anhydro-N-acetylmuramic acid kinase,				ATP-binding,Carbohydrate metabolism,Complete proteome,Kinase,Nucleotide-binding,Transferase,	Posttranslational modification, protein turnover, chaperones	chain:Anhydro-N-acetylmuramic acid kinase,nucleotide phosphate-binding region:ATP,	2	1119	0.00178731
STM14_3422	GJ0703GL001139	STY2953	PTS system glucitol/sorbitol-specific transporter subunit IIBC(STY2953)	S. Typhi str. CT18		GO:0009401~phosphoenolpyruvate-dependent sugar phosphotransferase system,	GO:0016021~integral component of membrane,		IPR004699:Phosphotransferase system, enzyme II sorbitol-specific factor,	sty00051:Fructose and mannose metabolism,sty02060:Phosphotransferase system (PTS),	PIRSF038321:PTS system, glucitol/sorbitol-specific IIC component,		Complete proteome,Membrane,Transmembrane,Transmembrane helix,	Carbohydrate transport and metabolism		1	561	0.00178253
STM14_0175	GJ0703GL003814	STY0168	anhydro-N-acetylmuramyl-tripeptide amidase(STY0168)	S. Typhi str. CT18		GO:0009253~peptidoglycan catabolic process,		GO:0008745~N-acetylmuramoyl-L-alanine amidase activity,	IPR002502:N-acetylmuramoyl-L-alanine amidase domain,			SM00644:Ami_2,	Complete proteome,	Defense mechanisms	chain:1,6-anhydro-N-acetylmuramyl-L-alanine amidase ampD,metal ion-binding site:Zinc; catalytic,sequence conflict,	1	561	0.00178253
STM14_3740	GJ0703GL000842	STY3249	hypothetical protein(STY3249)	S. Typhi str. CT18					IPR003774:Protein of unknown function UPF0301,				Complete proteome,	Transcription	chain:UPF0301 protein yqgE,	1	561	0.00178253
STM14_4176	GJ0703GL000449	STY4327	para-aminobenzoate synthase glutamine amidotransferase component II(pabA)	S. Typhi str. CT18		GO:0006541~glutamine metabolic process,		GO:0016740~transferase activity,GO:0016829~lyase activity,	IPR006221:Anthranilate synthase/para-aminobenzoate synthase like domain,IPR017926:Glutamine amidotransferase,	sty00790:Folate biosynthesis,			Complete proteome,Glutamine amidotransferase,Lyase,Transferase,	Amino acid transport and metabolism / Coenzyme metabolism	chain:Para-aminobenzoate synthase glutamine amidotransferase component II,domain:Glutamine amidotransferase type-1,	1	561	0.00178253
STM14_4377	GJ0703GL000222	STY4165	hypothetical protein(STY4165)	S. Typhi str. CT18				GO:0016740~transferase activity,	IPR011042:Six-bladed beta-propeller, TolB-like,IPR011047:Quinonprotein alcohol dehydrogenase-like superfamily,				Complete proteome,Transferase,			2	1122	0.00178253
STM14_4382	GJ0703GL000219	STY4162	KDO phosphoethanolamine transferase(STY4162)	S. Typhi str. CT18		GO:0008152~metabolic process,	GO:0016021~integral component of membrane,	GO:0008484~sulfuric ester hydrolase activity,GO:0016740~transferase activity,	IPR000917:Sulfatase,IPR012549:Domain of unknown function DUF1705,IPR017849:Alkaline phosphatase-like, alpha/beta/alpha,IPR017850:Alkaline-phosphatase-like, core domain,	sty00540:Lipopolysaccharide biosynthesis,sty01503:Cationic antimicrobial peptide (CAMP) resistance,			Complete proteome,Membrane,Transferase,Transmembrane,Transmembrane helix,	General function prediction only	chain:Phosphoethanolamine transferase eptB,signal peptide,topological domain:Cytoplasmic,topological domain:Periplasmic,transmembrane region,	3	1689	0.0017762
STM14_4645	GJ0703GL004800	STY3933	chromate reductase(STY3933)	S. Typhi str. CT18				GO:0016491~oxidoreductase activity,	IPR005025:NADPH-dependent FMN reductase,				Complete proteome,	General function prediction only		1	564	0.00177305
STM14_5144	GJ0703GL004379	STY4476	cytochrome c-type protein NrfB(STY4476)	S. Typhi str. CT18		GO:0006807~nitrogen compound metabolic process,	GO:0042597~periplasmic space,	GO:0020037~heme binding,	IPR010177:Doubled CXXCH motif,IPR011031:Multihaem cytochrome,IPR017564:Cytochrome c nitrite reductase, pentahaem subunit,				Complete proteome,Signal,	Inorganic ion transport and metabolism	signal peptide,	1	564	0.00177305
STM14_5336	GJ0703GL004211	STY4784	metallo-dependent hydrolase(STY4784)	S. Typhi str. CT18				GO:0016810~hydrolase activity, acting on carbon-nitrogen (but not peptide) bonds,GO:0046872~metal ion binding,	IPR006680:Amidohydrolase 1,IPR011059:Metal-dependent hydrolase, composite domain,IPR020043:Amidohydrolase EF0837/AHA3915, putative,	sty00240:Pyrimidine metabolism,sty01100:Metabolic pathways,	PIRSF039004:adenine deaminase, EF_0837 type,		Complete proteome,Metal-binding,Zinc,	General function prediction only		2	1131	0.00176835
STM14_0746	GJ0703GL003280	STY0689	rare lipoprotein A(STY0689)	S. Typhi str. CT18			GO:0005886~plasma membrane,	GO:0042834~peptidoglycan binding,	IPR007730:Sporulation-related domain,IPR009009:Barwin-related endoglucanase,IPR012997:Rare lipoprotein A, bacterial,				Cell membrane,Cell wall biogenesis/degradation,Complete proteome,Lipoprotein,Lyase,Membrane,Palmitate,Signal,		chain:Rare lipoprotein A,lipid moiety-binding region:N-palmitoyl cysteine,lipid moiety-binding region:S-diacylglycerol cysteine,signal peptide,	2	1131	0.00176835
STM14_3432	GJ0703GL001129	STY2963	rubredoxin reductase(STY2963)	S. Typhi str. CT18			GO:0005737~cytoplasm,	GO:0016731~oxidoreductase activity, acting on iron-sulfur proteins as donors, NAD or NADP as acceptor,	IPR023753:Pyridine nucleotide-disulphide oxidoreductase, FAD/NAD(P)-binding domain,IPR023961:Nitric oxide reductase FlRd-NAD(+) reductase,	sty05132:Salmonella infection,			Complete proteome,Cytoplasm,FAD,Flavoprotein,NAD,Oxidoreductase,	General function prediction only	chain:Nitric oxide reductase FlRd-NAD(+) reductase,	2	1131	0.00176835
STM14_1775	GJ0703GL002527	STY1650	metal-dependent hydrolase(STY1650)	S. Typhi str. CT18	General function prediction only,			GO:0016810~hydrolase activity, acting on carbon-nitrogen (but not peptide) bonds,	IPR011059:Metal-dependent hydrolase, composite domain,IPR013108:Amidohydrolase 3,				Complete proteome,Signal,	General function prediction only		3	1698	0.00176678
STM14_0549	GJ0703GL003460	STY0509	hypothetical protein(STY0509)	S. Typhi str. CT18	Function unknown,								Complete proteome,Lipoprotein,Signal,	Function unknown		1	567	0.00176367
STM14_3748	GJ0703GL000834	STY3257	oxygen-independent coproporphyrinogen III oxidase(STY3257)	S. Typhi str. CT18		GO:0006779~porphyrin-containing compound biosynthetic process,	GO:0005737~cytoplasm,	GO:0004109~coproporphyrinogen oxidase activity,GO:0051536~iron-sulfur cluster binding,	IPR004559:Coproporphyrinogen III oxidase, oxygen-independent related,IPR006638:Elongator protein 3/MiaB/NifB,IPR007197:Radical SAM,IPR010723:HemN, C-terminal domain,IPR023404:Radical SAM, alpha/beta horseshoe,	sty00860:Porphyrin and chlorophyll metabolism,sty01100:Metabolic pathways,sty01110:Biosynthesis of secondary metabolites,		SM00729:Elp3,	Complete proteome,	Coenzyme metabolism		2	1134	0.00176367
STM14_4105	GJ0703GL000514	STY4395	tRNA(ANN) t(6)A37 threonylcarbamoyladenosine modification protein(yrdC)	S. Typhi str. CT18		GO:0002949~tRNA threonylcarbamoyladenosine modification,	GO:0005737~cytoplasm,	GO:0003725~double-stranded RNA binding,GO:0005524~ATP binding,GO:0061710~L-threonylcarbamoyladenylate synthase,	IPR006070:YrdC-like domain,IPR017945:DHBP synthase RibB-like alpha/beta domain,IPR023535:tRNA threonylcarbamoyladenosine biosynthesis protein RimN (YrdC),				ATP-binding,Complete proteome,Cytoplasm,Nucleotide-binding,Nucleotidyltransferase,Transferase,tRNA processing,	Translation, ribosomal structure and biogenesis	chain:Putative ribosome maturation factor rimN,domain:YrdC-like,	1	570	0.00175439
STM14_2408	GJ0703GL001972	STY2194	hypothetical protein(STY2194)	S. Typhi str. CT18		GO:0030244~cellulose biosynthetic process,	GO:0005886~plasma membrane,GO:0016021~integral component of membrane,		IPR000160:GGDEF domain,			SM00267:DUF1,	Cell membrane,Cellulose biosynthesis,Complete proteome,Membrane,Transmembrane,Transmembrane helix,	Signal transduction mechanisms	chain:Cellulose synthesis regulatory protein,domain:GGDEF,transmembrane region,	3	1710	0.00175439
STM14_3469	GJ0703GL001098	STY2991	cell invasion protein(orgAa)	S. Typhi str. CT18		GO:0009405~pathogenesis,			IPR013388:Type III secretion apparatus protein OrgA/MxiK,				Complete proteome,			1	576	0.00173611
STM14_1757	GJ0703GL002541	STY1664	ferredoxin-like protein(STY1664)	S. Typhi str. CT18		GO:0022900~electron transport chain,	GO:0005886~plasma membrane,	GO:0009055~electron carrier activity,GO:0046872~metal ion binding,GO:0051539~4 iron, 4 sulfur cluster binding,	IPR007202:4Fe-4S domain,IPR010207:Electron transport complex, RnfB,IPR016463:Electron transport complex, RnfB, Proteobacteria,IPR017896:4Fe-4S ferredoxin-type, iron-sulpur binding domain,IPR017900:4Fe-4S ferredoxin, iron-sulphur binding, conserved site,		PIRSF005784:electron transport complex Rnf, RnfB subunit,		4Fe-4S,Cell inner membrane,Cell membrane,Complete proteome,Electron transport,Iron,Iron-sulfur,Membrane,Metal-binding,Repeat,Transport,	Energy production and conversion	chain:Electron transport complex protein rnfB,domain:4Fe-4S ferredoxin-type 1,domain:4Fe-4S ferredoxin-type 2,metal ion-binding site:Iron-sulfur 1 (2Fe-2S),metal ion-binding site:Iron-sulfur 2 (4Fe-4S),metal ion-binding site:Iron-sulfur 3 (4Fe-4S),	1	576	0.00173611
STM14_1901	GJ0703GL002414	STY1490	regulatory protein(STY1490)	S. Typhi str. CT18	Transcription,	GO:0006351~transcription, DNA-templated,GO:0006355~regulation of transcription, DNA-templated,		GO:0003677~DNA binding,	IPR001647:DNA-binding HTH domain, TetR-type,IPR009057:Homeodomain-like,IPR011075:Tetracycline transcriptional regulator, TetR-related, C-terminal,IPR015893:Tetracycline transcriptional regulator, TetR-like, C-terminal,				Complete proteome,DNA-binding,Transcription,Transcription regulation,	Function unknown		1	576	0.00173611
STM14_1315	GJ0703GL002856	STY1186	glucans biosynthesis protein(STY1186)	S. Typhi str. CT18		GO:0009250~glucan biosynthetic process,	GO:0005886~plasma membrane,GO:0016021~integral component of membrane,	GO:0016741~transferase activity, transferring one-carbon groups,GO:0016747~transferase activity, transferring acyl groups other than amino-acyl groups,	IPR002656:Acyltransferase 3,IPR023723:Glucan biosynthesis protein C,				Acyltransferase,Cell membrane,Complete proteome,Membrane,Transferase,Transmembrane,Transmembrane helix,		chain:Glucans biosynthesis protein C,transmembrane region,	2	1152	0.00173611
STM14_0440	GJ0703GL003559	STY0407	penicillin-binding protein AmpH(ampH)	S. Typhi str. CT18	Defense mechanisms,			GO:0004180~carboxypeptidase activity,	IPR001466:Beta-lactamase-related,IPR012338:Beta-lactamase/transpeptidase-like,				Carboxypeptidase,Complete proteome,Hydrolase,Protease,Signal,	Defense mechanisms		2	1155	0.0017316
STM14_4390	GJ0703GL000211	STY4160	3-methyladenine DNA glycosylase I, constitutive(STY4160)	S. Typhi str. CT18		GO:0006284~base-excision repair,		GO:0008725~DNA-3-methyladenine glycosylase activity,GO:0046872~metal ion binding,	IPR004597:DNA-3-methyladenine glycosylase I,IPR005019:Methyladenine glycosylase,IPR011257:DNA glycosylase,	sty03410:Base excision repair,			3D-structure,Complete proteome,Metal-binding,Zinc,	DNA replication, recombination, and repair		1	579	0.00172712
STM14_1729	GJ0703GL002570	STY1691	superoxide dismutase(STY1691)	S. Typhi str. CT18				GO:0004784~superoxide dismutase activity,GO:0046872~metal ion binding,	IPR001189:Manganese/iron superoxide dismutase,IPR019831:Manganese/iron superoxide dismutase, N-terminal,IPR019832:Manganese/iron superoxide dismutase, C-terminal,IPR019833:Manganese/iron superoxide dismutase, binding site,		PIRSF000349:superoxide dismutase, Mn/Fe specific,		Complete proteome,Iron,Metal-binding,Oxidoreductase,	Inorganic ion transport and metabolism	chain:Superoxide dismutase [Fe],metal ion-binding site:Iron,sequence conflict,	1	579	0.00172712
STM14_4928	GJ0703GL004548	STY3769	cystathionine gamma-synthase(STY3769)	S. Typhi str. CT18				GO:0003824~catalytic activity,GO:0030170~pyridoxal phosphate binding,	IPR000277:Cys/Met metabolism, pyridoxal phosphate-dependent enzyme,IPR011821:O-succinylhomoserine (thiol)-lyase,IPR015421:Pyridoxal phosphate-dependent transferase, major region, subdomain 1,IPR015422:Pyridoxal phosphate-dependent transferase, major region, subdomain 2,IPR015424:Pyridoxal phosphate-dependent transferase,	sty00270:Cysteine and methionine metabolism,sty00450:Selenocompound metabolism,sty00920:Sulfur metabolism,sty01100:Metabolic pathways,sty01110:Biosynthesis of secondary metabolites,sty01130:Biosynthesis of antibiotics,sty01230:Biosynthesis of amino acids,	PIRSF001434:cystathionine gamma-synthase,		Complete proteome,Pyridoxal phosphate,	Amino acid transport and metabolism		2	1158	0.00172712
STM14_3831	GJ0703GL000759	STY3337	alcohol dehydrogenase(STY3337)	S. Typhi str. CT18	Energy production and conversion,			GO:0016491~oxidoreductase activity,GO:0046872~metal ion binding,	IPR001670:Alcohol dehydrogenase, iron-type,IPR018211:Alcohol dehydrogenase, iron-type, conserved site,	sty00640:Propanoate metabolism,			Complete proteome,	Energy production and conversion		2	1161	0.00172265
STM14_4803	GJ0703GL004667	STY3886	molybdopterin-guanine dinucleotide biosynthesis protein A(STY3886)	S. Typhi str. CT18		GO:0006777~Mo-molybdopterin cofactor biosynthetic process,	GO:0005737~cytoplasm,	GO:0005525~GTP binding,GO:0046872~metal ion binding,GO:0061603~molybdenum cofactor guanylyltransferase activity,	IPR013482:Molybdenum cofactor guanylyltransferase,IPR025877:MobA-like NTP transferase domain,				Complete proteome,Cytoplasm,GTP-binding,Magnesium,Metal-binding,Molybdenum cofactor biosynthesis,Nucleotide-binding,Transferase,	Coenzyme metabolism	chain:43 kDa relaxation protein,chain:Molybdopterin-guanine dinucleotide biosynthesis protein A,	1	582	0.00171821
STM14_3097	GJ0703GL001376	STY2770	ribosomal RNA large subunit methyltransferase N(STY2770)	S. Typhi str. CT18		GO:0070475~rRNA base methylation,	GO:0005737~cytoplasm,	GO:0000049~tRNA binding,GO:0002935~tRNA (adenine-C2-)-methyltransferase activity,GO:0019843~rRNA binding,GO:0046872~metal ion binding,GO:0051539~4 iron, 4 sulfur cluster binding,GO:0070040~rRNA (adenine-C2-)-methyltransferase activity,	IPR004383:Ribosomal RNA large subunit methyltransferase RlmN/Cfr,IPR007197:Radical SAM,IPR013785:Aldolase-type TIM barrel,IPR027492:Dual-specificity RNA methyltransferase RlmN,		PIRSF006004:radical SAM enzyme, Cfr type,		4Fe-4S,Complete proteome,Cytoplasm,Disulfide bond,Iron,Iron-sulfur,Metal-binding,Methyltransferase,rRNA processing,S-adenosyl-L-methionine,Transferase,tRNA processing,	General function prediction only	chain:Ribosomal RNA large subunit methyltransferase N,metal ion-binding site:Iron-sulfur (4Fe-4S-S-AdoMet),	2	1164	0.00171821
STM14_2668	GJ0703GL001775	STY2394	ABC transporter permease(STY2394)	S. Typhi str. CT18		GO:0006810~transport,	GO:0016021~integral component of membrane,		IPR000515:Binding-protein-dependent transport systems inner membrane component,	sty02010:ABC transporters,			Complete proteome,Membrane,Transmembrane,	Amino acid transport and metabolism	signal peptide,	2	1167	0.0017138
STM14_3242	GJ0703GL001304	STY2838	cysteine/O-acetylserine exporter(STY2838)	S. Typhi str. CT18		GO:0006865~amino acid transport,	GO:0005886~plasma membrane,GO:0016021~integral component of membrane,		IPR001123:Lysine-type exporter protein (LYSE/YGGA),				Amino-acid transport,Cell inner membrane,Cell membrane,Complete proteome,Membrane,Transmembrane,Transmembrane helix,Transport,	Amino acid transport and metabolism	chain:Cysteine/O-acetylserine efflux protein,topological domain:Cytoplasmic,topological domain:Periplasmic,transmembrane region,	1	585	0.0017094
STM14_0302	GJ0703GL003688	STY0278	drug efflux protein(STY0278)	S. Typhi str. CT18	Carbohydrate transport and metabolism,	GO:0055085~transmembrane transport,	GO:0016021~integral component of membrane,		IPR011701:Major facilitator superfamily,IPR020846:Major facilitator superfamily domain,				Complete proteome,Membrane,Transmembrane,Transmembrane helix,	Carbohydrate transport and metabolism		2	1173	0.00170503
STM14_4571	GJ0703GL000051	STY3992	Two-component system response regulator(STY3992)	S. Typhi str. CT18		GO:0000160~phosphorelay signal transduction system,GO:0006351~transcription, DNA-templated,GO:0006355~regulation of transcription, DNA-templated,	GO:0005622~intracellular,	GO:0003677~DNA binding,	IPR000792:Transcription regulator LuxR, C-terminal,IPR001789:Signal transduction response regulator, receiver domain,IPR011006:CheY-like superfamily,IPR011991:Winged helix-turn-helix DNA-binding domain,IPR016032:Signal transduction response regulator, C-terminal effector,	sty02020:Two-component system,		SM00421:HTH_LUXR,SM00448:REC,	Complete proteome,DNA-binding,Transcription,Transcription regulation,	Signal transduction mechanisms / Transcription	chain:Transcriptional regulatory protein uhpA,DNA-binding region:H-T-H motif,domain:HTH luxR-type,domain:Response regulatory,modified residue,	1	588	0.00170068
STM14_0755	GJ0703GL003270	STY0698	rare lipoprotein B(STY0698)	S. Typhi str. CT18		GO:0043165~Gram-negative-bacterium-type cell outer membrane assembly,	GO:0009279~cell outer membrane,		IPR007485:Lipopolysaccharide assembly, LptE,				Cell outer membrane,Complete proteome,Lipoprotein,Membrane,Palmitate,Signal,	Cell envelope biogenesis, outer membrane	chain:LPS-assembly lipoprotein lptE,lipid moiety-binding region:N-palmitoyl cysteine,lipid moiety-binding region:S-diacylglycerol cysteine,signal peptide,	1	588	0.00170068
STM14_4181	GJ0703GL000446	STY4323	transporter(yhfC)	S. Typhi str. CT18		GO:0055085~transmembrane transport,	GO:0005886~plasma membrane,GO:0016021~integral component of membrane,		IPR011701:Major facilitator superfamily,IPR020846:Major facilitator superfamily domain,IPR023528:Major facilitator superfamily transporter, TsgA,				Cell inner membrane,Cell membrane,Complete proteome,Membrane,Transmembrane,Transmembrane helix,	Carbohydrate transport and metabolism	chain:Protein tsgA,sequence conflict,topological domain:Cytoplasmic,topological domain:Periplasmic,transmembrane region,	2	1179	0.00169635
STM14_2312	GJ0703GL002054	STY2109	aspartyl-tRNA synthetase(STY2109)	S. Typhi str. CT18		GO:0006418~tRNA aminoacylation for protein translation,	GO:0005737~cytoplasm,	GO:0003676~nucleic acid binding,GO:0004815~aspartate-tRNA ligase activity,GO:0005524~ATP binding,	IPR002312:Aspartyl/Asparaginyl-tRNA synthetase, class IIb,IPR004115:GAD domain,IPR004364:Aminoacyl-tRNA synthetase, class II (D/K/N),IPR004365:Nucleic acid binding, OB-fold, tRNA/helicase-type,IPR004524:Aspartate-tRNA ligase, class IIb, bacterial/mitochondrial-type,IPR006195:Aminoacyl-tRNA synthetase, class II,IPR012340:Nucleic acid-binding, OB-fold,IPR018150:Aminoacyl-tRNA synthetase, class II (…	sty00970:Aminoacyl-tRNA biosynthesis,			Aminoacyl-tRNA synthetase,ATP-binding,Complete proteome,Cytoplasm,Ligase,Nucleotide-binding,Protein biosynthesis,	Translation, ribosomal structure and biogenesis	chain:Aspartyl-tRNA synthetase,	3	1770	0.00169492
STM14_1526	GJ0703GL002734	STY1856	regulatory protein(STY1856)	S. Typhi str. CT18		GO:0006351~transcription, DNA-templated,GO:0006355~regulation of transcription, DNA-templated,		GO:0003677~DNA binding,	IPR000792:Transcription regulator LuxR, C-terminal,IPR011991:Winged helix-turn-helix DNA-binding domain,IPR016032:Signal transduction response regulator, C-terminal effector,			SM00421:HTH_LUXR,	Complete proteome,DNA-binding,Transcription,Transcription regulation,	Signal transduction mechanisms / Transcription		1	591	0.00169205
STM14_4586	GJ0703GL000043	STY3981	multidrug resistance protein D(STY3981)	S. Typhi str. CT18			GO:0016021~integral component of membrane,	GO:0015238~drug transmembrane transporter activity,	IPR004734:Multidrug resistance protein,IPR011701:Major facilitator superfamily,IPR020846:Major facilitator superfamily domain,				Complete proteome,Membrane,Transmembrane,Transmembrane helix,	Carbohydrate transport and metabolism	signal peptide,	2	1182	0.00169205
STM14_3827	GJ0703GL000762	STY3333	beta-cystathionase(STY3333)	S. Typhi str. CT18		GO:0006520~cellular amino acid metabolic process,	GO:0005737~cytoplasm,	GO:0004121~cystathionine beta-lyase activity,GO:0030170~pyridoxal phosphate binding,	IPR000277:Cys/Met metabolism, pyridoxal phosphate-dependent enzyme,IPR006233:Cystathionine beta-lyase, bacterial,IPR015421:Pyridoxal phosphate-dependent transferase, major region, subdomain 1,IPR015422:Pyridoxal phosphate-dependent transferase, major region, subdomain 2,IPR015424:Pyridoxal phosphate-dependent transferase,	sty00270:Cysteine and methionine metabolism,sty00450:Selenocompound metabolism,sty01100:Metabolic pathways,sty01110:Biosynthesis of secondary metabolites,sty01230:Biosynthesis of amino acids,	PIRSF001434:cystathionine gamma-synthase,		Complete proteome,Lyase,Pyridoxal phosphate,	Amino acid transport and metabolism	chain:Cystathionine beta-lyase,modified residue,sequence conflict,	2	1185	0.00168776
STM14_0545	GJ0703GL003465	STY0504	ABC transporter ATP-binding protein(STY0504)	S. Typhi str. CT18			GO:0016021~integral component of membrane,	GO:0005524~ATP binding,GO:0042626~ATPase activity, coupled to transmembrane movement of substances,	IPR003439:ABC transporter-like,IPR003593:AAA+ ATPase domain,IPR011527:ABC transporter, transmembrane domain, type 1,IPR017871:ABC transporter, conserved site,IPR027417:P-loop containing nucleoside triphosphate hydrolase,			SM00382:AAA,	ATP-binding,Complete proteome,Membrane,Nucleotide-binding,Transmembrane,Transmembrane helix,	Defense mechanisms	signal peptide,	3	1779	0.00168634
STM14_4300	GJ0703GL000348	STY4239	16S rRNA (guanine(966)-N(2))-methyltransferase(STY4239)	S. Typhi str. CT18				GO:0003676~nucleic acid binding,GO:0052913~16S rRNA (guanine(966)-N(2))-methyltransferase activity,	IPR002052:DNA methylase, N-6 adenine-specific, conserved site,IPR004398:RNA methyltransferase, RsmD,		PIRSF004553:methylase, YhhF type,		Complete proteome,Methyltransferase,rRNA processing,S-adenosyl-L-methionine,Transferase,	DNA replication, recombination, and repair		1	594	0.0016835
STM14_1735	GJ0703GL002563	STY1685	TetR family transcriptional regulator(STY1685)	S. Typhi str. CT18	Transcription,	GO:0006351~transcription, DNA-templated,GO:0006355~regulation of transcription, DNA-templated,		GO:0003677~DNA binding,	IPR001647:DNA-binding HTH domain, TetR-type,IPR009057:Homeodomain-like,IPR011075:Tetracycline transcriptional regulator, TetR-related, C-terminal,IPR015893:Tetracycline transcriptional regulator, TetR-like, C-terminal,				Complete proteome,DNA-binding,Transcription,Transcription regulation,	Transcription		1	594	0.0016835
STM14_4907	GJ0703GL004568	STY3788	hypothetical protein(STY3788)	S. Typhi str. CT18					IPR009918:Protein of unknown function DUF1454,				Complete proteome,Signal,		signal peptide,	1	594	0.0016835
STM14_1272	GJ0703GL002887	STY1155	trp repressor binding protein(STY1155)	S. Typhi str. CT18				GO:0003955~NAD(P)H dehydrogenase (quinone) activity,GO:0010181~FMN binding,GO:0050660~flavin adenine dinucleotide binding,GO:0050661~NADP binding,GO:0051287~NAD binding,	IPR005025:NADPH-dependent FMN reductase,IPR008254:Flavodoxin/nitric oxide synthase,IPR010089:Flavoprotein WrbA,	sty00130:Ubiquinone and other terpenoid-quinone biosynthesis,sty01110:Biosynthesis of secondary metabolites,			Complete proteome,Flavoprotein,FMN,NAD,NADP,Nucleotide-binding,Oxidoreductase,	General function prediction only	chain:Flavoprotein wrbA,domain:Flavodoxin-like,nucleotide phosphate-binding region:FMN,	1	594	0.0016835
STM14_3300	GJ0703GL001261	STY2878	type I secretion system protein(STY2878)	S. Typhi str. CT18		GO:0009306~protein secretion,	GO:0016021~integral component of membrane,		IPR003997:RTX secretion protein D, Gram-negative bacteria,IPR010129:Type I secretion membrane fusion protein, HlyD,				Complete proteome,Membrane,Transmembrane,Transmembrane helix,	Defense mechanisms		2	1188	0.0016835
STM14_1883	GJ0703GL002430	STY1503	hydrolase(STY1503)	S. Typhi str. CT18		GO:0005992~trehalose biosynthetic process,	GO:0005737~cytoplasm,	GO:0033942~4-alpha-D-{(1->4)-alpha-D-glucano}trehalose trehalohydrolase activity,	IPR006047:Glycosyl hydrolase, family 13, catalytic domain,IPR012768:Malto-oligosyltrehalose trehalohydrolase,IPR013781:Glycoside hydrolase, catalytic domain,IPR013783:Immunoglobulin-like fold,IPR014756:Immunoglobulin E-set,IPR015902:Glycoside hydrolase, family 13,IPR017853:Glycoside hydrolase, superfamily,IPR022567:Domain of unknown function DUF3459,		PIRSF006337:glycosyltrehalose trehalohydrolase,	SM00642:Aamy,	Complete proteome,Glycosidase,Hydrolase,	Carbohydrate transport and metabolism		3	1782	0.0016835
STM14_5106	GJ0703GL004414	STY4444	aromatic-amino-acid aminotransferase(STY4444)	S. Typhi str. CT18		GO:0006520~cellular amino acid metabolic process,GO:0009058~biosynthetic process,		GO:0008793~aromatic-amino-acid:2-oxoglutarate aminotransferase activity,GO:0030170~pyridoxal phosphate binding,GO:0080130~L-phenylalanine:2-oxoglutarate aminotransferase activity,	IPR000796:Aspartate/other aminotransferase,IPR004839:Aminotransferase, class I/classII,IPR015421:Pyridoxal phosphate-dependent transferase, major region, subdomain 1,IPR015424:Pyridoxal phosphate-dependent transferase,	sty00270:Cysteine and methionine metabolism,sty00350:Tyrosine metabolism,sty00360:Phenylalanine metabolism,sty00400:Phenylalanine, tyrosine and tryptophan biosynthesis,sty00401:Novobiocin biosynthesis,sty01100:Metabolic pathways,sty01110:Biosynthesis of secondary metabolites,sty01130:Biosynthesis of antibiotics,sty01230:Biosynthesis of amino acids,			Aminotransferase,Complete proteome,Transferase,	Amino acid transport and metabolism	binding site:Substrate,chain:Aromatic-amino-acid aminotransferase,modified residue,sequence conflict,	2	1191	0.00167926
STM14_2011	GJ0703GL002311	STY1400	DNA-binding protein(STY1400)	S. Typhi str. CT18				GO:0043565~sequence-specific DNA binding,	IPR001387:Helix-turn-helix,IPR010982:Lambda repressor-like, DNA-binding domain,IPR011051:RmlC-like cupin domain,IPR013096:Cupin 2, conserved barrel,IPR014710:RmlC-like jelly roll fold,			SM00530:HTH_XRE,	Complete proteome,DNA-binding,	Transcription		1	600	0.00166667
STM14_4177	GJ0703GL000448	STY4326	cell filamentation protein Fic(fic)	S. Typhi str. CT18					IPR003812:Fido domain,				Complete proteome,	Cell division and chromosome partitioning	chain:Probable adenosine monophosphate-protein transferase fic,domain:Fido,sequence conflict,	1	600	0.00166667
STM14_2828	GJ0703GL001661	STY2521	MR-MLE-family protein(STY2521)	S. Typhi str. CT18	Cell envelope biogenesis, outer membrane / General function prediction only,	GO:0009063~cellular amino acid catabolic process,		GO:0000287~magnesium ion binding,GO:0050032~L-rhamnonate dehydratase activity,	IPR001354:Mandelate racemase/muconate lactonizing enzyme,IPR013341:Mandelate racemase/muconate lactonizing enzyme, N-terminal,IPR013342:Mandelate racemase/muconate lactonizing enzyme, C-terminal,IPR018110:Mandelate racemase/muconate lactonizing enzyme, conserved site,IPR023444:L-rhamnonate dehydratase,	sty00051:Fructose and mannose metabolism,sty01120:Microbial metabolism in diverse environments,		SM00922:SM00922,	Complete proteome,Lyase,Magnesium,Metal-binding,	Cell envelope biogenesis, outer membrane / General function prediction only	active site:Proton acceptor,binding site:Substrate,chain:L-rhamnonate dehydratase,metal ion-binding site:Magnesium,site:Increases basicity of active site His,site:Transition state stabilizer,	2	1203	0.00166251
STM14_3598	GJ0703GL000965	STY3124	aminotransferase(STY3124)	S. Typhi str. CT18	Posttranslational modification, protein turnover, chaperones,	GO:0016226~iron-sulfur cluster assembly,		GO:0008483~transaminase activity,GO:0031071~cysteine desulfurase activity,	IPR000192:Aminotransferase, class V/Cysteine desulfurase,IPR015421:Pyridoxal phosphate-dependent transferase, major region, subdomain 1,IPR015422:Pyridoxal phosphate-dependent transferase, major region, subdomain 2,IPR015424:Pyridoxal phosphate-dependent transferase,IPR020578:Aminotransferase class-V pyridoxal-phosphate binding site,IPR022471:Cysteine desulphurase, catalytic subunit, CsdA,				Aminotransferase,Complete proteome,Pyridoxal phosphate,Transferase,	Amino acid transport and metabolism		2	1203	0.00166251
STM14_2385	GJ0703GL001994	STY2173	hypothetical protein(STY2173)	S. Typhi str. CT18			GO:0016021~integral component of membrane,		IPR007272:Sulphur transport domain,				Complete proteome,Membrane,Transmembrane,Transmembrane helix,	General function prediction only		2	1203	0.00166251
STM14_2833	GJ0703GL001656	STY2526	Ais protein(STY2526)	S. Typhi str. CT18		GO:0008653~lipopolysaccharide metabolic process,	GO:0042597~periplasmic space,	GO:0016791~phosphatase activity,	IPR011310:Lipopolysaccharide core heptose(II)-phosphate phosphatase,IPR013078:Histidine phosphatase superfamily, clade-1,		PIRSF011416:phosphatase, Ais/TraG/AfrS type,		Complete proteome,Hydrolase,Periplasm,Signal,		chain:Lipopolysaccharide core heptose(II)- phosphate phosphatase,signal peptide,	1	603	0.00165837
STM14_4777	GJ0703GL004684	STY3588	hypothetical protein(STY3588)	S. Typhi str. CT18	Function unknown,				IPR003033:SCP2 sterol-binding domain,				Complete proteome,	Function unknown		1	603	0.00165837
STM14_0751	GJ0703GL003274	STY0694	adenosylcobalamin/alpha-ribazole phosphatase(cobC)	S. Typhi str. CT18		GO:0009236~cobalamin biosynthetic process,		GO:0043755~alpha-ribazole phosphatase activity,	IPR001345:Phosphoglycerate/bisphosphoglycerate mutase, active site,IPR013078:Histidine phosphatase superfamily, clade-1,IPR017578:Alpha-ribazole phosphatase, CobC,	sty00860:Porphyrin and chlorophyll metabolism,sty01100:Metabolic pathways,		SM00855:SM00855,	Cobalamin biosynthesis,Complete proteome,Hydrolase,	Carbohydrate transport and metabolism	active site:Tele-phosphohistidine intermediate,chain:Alpha-ribazole phosphatase,sequence conflict,site:Interaction with carboxyl group of phosphoglycerates,	1	606	0.00165017
STM14_4442	GJ0703GL000167	STY4112	glutathione transferase(STY4112)	S. Typhi str. CT18				GO:0016740~transferase activity,	IPR004045:Glutathione S-transferase, N-terminal,IPR004046:Glutathione S-transferase, C-terminal,IPR010987:Glutathione S-transferase, C-terminal-like,IPR012336:Thioredoxin-like fold,				Complete proteome,Transferase,	Posttranslational modification, protein turnover, chaperones		1	606	0.00165017
STM14_2572	GJ0703GL001871	STY2287	phosphoribosyl-AMP cyclohydrolase/phosphoribosyl-ATP pyrophosphohydrolase(STY2287)	S. Typhi str. CT18		GO:0000105~histidine biosynthetic process,	GO:0005737~cytoplasm,	GO:0004635~phosphoribosyl-AMP cyclohydrolase activity,GO:0004636~phosphoribosyl-ATP diphosphatase activity,GO:0005524~ATP binding,	IPR002496:Phosphoribosyl-AMP cyclohydrolase domain,IPR008179:Phosphoribosyl-ATP pyrophosphohydrolase,IPR021130:Phosphoribosyl-ATP pyrophosphohydrolase-like,IPR023019:Histidine biosynthesis bifunctional protein HisIE,	sty00340:Histidine metabolism,sty01100:Metabolic pathways,sty01110:Biosynthesis of secondary metabolites,sty01230:Biosynthesis of amino acids,			Amino-acid biosynthesis,ATP-binding,Complete proteome,Cytoplasm,Histidine biosynthesis,Hydrolase,Multifunctional enzyme,Nucleotide-binding,	Amino acid transport and metabolism	chain:Histidine biosynthesis bifunctional protein hisIE,region of interest:Phosphoribosyl-AMP cyclohydrolase,region of interest:Phosphoribosyl-ATP pyrophosphohydrolase,sequence conflict,	1	609	0.00164204
STM14_3608	GJ0703GL000958	STY3131	exonuclease V subunit alpha(recD)	S. Typhi str. CT18		GO:0000724~double-strand break repair via homologous recombination,	GO:0009338~exodeoxyribonuclease V complex,	GO:0003677~DNA binding,GO:0004003~ATP-dependent DNA helicase activity,GO:0005524~ATP binding,GO:0008854~exodeoxyribonuclease V activity,	IPR003593:AAA+ ATPase domain,IPR006344:Exodeoxyribonuclease V, alpha subunit,IPR027417:P-loop containing nucleoside triphosphate hydrolase,	sty03440:Homologous recombination,		SM00382:AAA,	ATP-binding,Complete proteome,DNA damage,DNA repair,DNA-binding,Exonuclease,Helicase,Hydrolase,Nuclease,Nucleotide-binding,	DNA replication, recombination, and repair		3	1833	0.00163666
STM14_4791	GJ0703GL004671	STY3575	hypothetical protein(STY3575)	S. Typhi str. CT18					IPR000640:Translation elongation factor EFG, V domain,IPR001498:Impact, N-terminal,IPR009022:Elongation factor G, III-V domain,IPR015269:Uncharacterised domain UPF0029, Impact, C-terminal,IPR015796:Impact family, bacterial/archaeal,IPR020568:Ribosomal protein S5 domain 2-type fold,IPR020569:Uncharacterised protein family UPF0029, Impact, conserved site,IPR023582:Impact family,				Complete proteome,	Function unknown		1	612	0.00163399
STM14_4526	GJ0703GL000089	STY4032	hypothetical protein(rmbA)	S. Typhi str. CT18									Complete proteome,			1	615	0.00162602
STM14_3473	GJ0703GL001094	STY2995	pathogenicity 1 island effector protein(prgH)	S. Typhi str. CT18			GO:0016021~integral component of membrane,		IPR013387:Type III secretion system, PrgH/EprH,IPR019029:Type III secretion system, PrgH/EprH-like,				Complete proteome,Membrane,Transmembrane,Transmembrane helix,		chain:Protein prgH,helix,strand,transmembrane region,turn,	2	1233	0.00162206
STM14_1020	GJ0703GL003068	STY0902	TetR family trancriptional regulator(STY0902)	S. Typhi str. CT18	Function unknown,	GO:0006351~transcription, DNA-templated,GO:0006355~regulation of transcription, DNA-templated,		GO:0003677~DNA binding,	IPR001647:DNA-binding HTH domain, TetR-type,IPR009057:Homeodomain-like,IPR011075:Tetracycline transcriptional regulator, TetR-related, C-terminal,IPR015893:Tetracycline transcriptional regulator, TetR-like, C-terminal,				Complete proteome,DNA-binding,Transcription,Transcription regulation,	Function unknown		1	618	0.00161812
STM14_4762	GJ0703GL004697	STY3600	threonine efflux protein(rhtC)	S. Typhi str. CT18		GO:0006865~amino acid transport,	GO:0005886~plasma membrane,GO:0016021~integral component of membrane,		IPR001123:Lysine-type exporter protein (LYSE/YGGA),IPR004778:Homoserine/Threonine efflux protein,		PIRSF006324:amino acid efflux protein, LeuE type,		Cell inner membrane,Cell membrane,Complete proteome,Membrane,Transmembrane,Transmembrane helix,Transport,	Amino acid transport and metabolism	chain:Threonine efflux protein,topological domain:Cytoplasmic,topological domain:Periplasmic,transmembrane region,	1	618	0.00161812
STM14_5240	GJ0703GL004299	STY4716	DNA mismatch repair protein(mutL)	S. Typhi str. CT18		GO:0006298~mismatch repair,		GO:0005524~ATP binding,GO:0030983~mismatched DNA binding,	IPR002099:DNA mismatch repair protein,IPR003594:Histidine kinase-like ATPase, ATP-binding domain,IPR013507:DNA mismatch repair protein, C-terminal,IPR014721:Ribosomal protein S5 domain 2-type fold, subgroup,IPR014762:DNA mismatch repair, conserved site,IPR014790:MutL, C-terminal, dimerisation,IPR020568:Ribosomal protein S5 domain 2-type fold,IPR020667:DNA mismatch repair protein, MutL,	sty03430:Mismatch repair,		SM00853:SM00853,SM01340:SM01340,	Complete proteome,DNA damage,DNA repair,	DNA replication, recombination, and repair	chain:DNA mismatch repair protein mutL,	3	1854	0.00161812
STM14_2693	GJ0703GL001752	STY2416	oxidoreductase(STY2416)	S. Typhi str. CT18		GO:0006208~pyrimidine nucleobase catabolic process,		GO:0003954~NADH dehydrogenase activity,GO:0004159~dihydrouracil dehydrogenase (NAD+) activity,GO:0051536~iron-sulfur cluster binding,	IPR000103:Pyridine nucleotide-disulphide oxidoreductase, class-II,IPR009051:Alpha-helical ferredoxin,IPR016040:NAD(P)-binding domain,IPR023753:Pyridine nucleotide-disulphide oxidoreductase, FAD/NAD(P)-binding domain,	sty00240:Pyrimidine metabolism,sty00410:beta-Alanine metabolism,sty00770:Pantothenate and CoA biosynthesis,sty01100:Metabolic pathways,			Complete proteome,NAD,Oxidoreductase,	Amino acid transport and metabolism / General function prediction only	chain:Uncharacterized oxidoreductase yeiT,	2	1239	0.00161421
STM14_4505	GJ0703GL000105	STY4052	5'guanylate kinase(STY4052)	S. Typhi str. CT18			GO:0005737~cytoplasm,	GO:0004385~guanylate kinase activity,GO:0005524~ATP binding,	IPR008144:Guanylate kinase,IPR008145:Guanylate kinase/L-type calcium channel,IPR017665:Guanylate kinase, sub-group,IPR020590:Guanylate kinase, conserved site,IPR027417:P-loop containing nucleoside triphosphate hydrolase,	sty00230:Purine metabolism,sty01100:Metabolic pathways,		SM00072:GuKc,	ATP-binding,Complete proteome,Cytoplasm,Kinase,Nucleotide-binding,Transferase,	Nucleotide transport and metabolism	chain:Guanylate kinase,domain:Guanylate kinase-like,nucleotide phosphate-binding region:ATP,	1	621	0.00161031
STM14_4724	GJ0703GL004727	STY3629	lipopolysaccharide biosynthesis protein(STY3629)	S. Typhi str. CT18		GO:0006810~transport,GO:0009246~enterobacterial common antigen biosynthetic process,	GO:0005887~integral component of plasma membrane,		IPR002797:Polysaccharide biosynthesis protein,				Cell inner membrane,Cell membrane,Complete proteome,Membrane,Transmembrane,Transmembrane helix,Transport,	General function prediction only		2	1248	0.00160256
STM14_4613	GJ0703GL000018	STY3957	chaperone protein TorD(STY3957)	S. Typhi str. CT18		GO:0006457~protein folding,	GO:0005737~cytoplasm,		IPR020945:DMSO/Nitrate reductase chaperone,IPR023069:Chaperone TorD,	sty02020:Two-component system,			Chaperone,Complete proteome,Cytoplasm,	General function prediction only	chain:Chaperone protein torD,	1	630	0.0015873
STM14_2536	GJ0703GL001904	STY2252	propanediol utilization phosphotransacylase(pduL)	S. Typhi str. CT18	Secondary metabolites biosynthesis, transport, and catabolism,	GO:0051144~propanediol catabolic process,		GO:0016747~transferase activity, transferring acyl groups other than amino-acyl groups,	IPR008300:Propanediol utilisation protein,	sty00640:Propanoate metabolism,	PIRSF010130:propanediol utilization protein, PduL type,		Acyltransferase,Complete proteome,Transferase,	Secondary metabolites biosynthesis, transport, and catabolism		1	630	0.0015873
STM14_1956	GJ0703GL002373	STY1447	ribulose-5-phosphate 3-epimerase(STY1447)	S. Typhi str. CT18		GO:0005975~carbohydrate metabolic process,		GO:0004750~ribulose-phosphate 3-epimerase activity,	IPR000056:Ribulose-phosphate 3-epimerase-like,IPR011060:Ribulose-phosphate binding barrel,IPR013785:Aldolase-type TIM barrel,				Complete proteome,Isomerase,	Carbohydrate transport and metabolism		1	630	0.0015873
STM14_981	GJ0703GL003091	STY0880	hypothetical protein(STY0880)	S. Typhi str. CT18					IPR010856:Protein of unknown function DUF1479,IPR027443:Isopenicillin N synthase-like,				Complete proteome,			2	1263	0.00158353
STM14_5280	GJ0703GL004264	STY4752	hypothetical protein(ytfB)	S. Typhi str. CT18	Cell envelope biogenesis, outer membrane,				IPR007340:Opacity-associated protein A,IPR013731:Opacity-associated protein A, N-terminal,				Complete proteome,	Cell envelope biogenesis, outer membrane		1	633	0.00157978
STM14_3950	GJ0703GL000647	STY3451	nucleoside-diphosphate-sugar epimerase(STY3451)	S. Typhi str. CT18				GO:0016620~oxidoreductase activity, acting on the aldehyde or oxo group of donors, NAD or NADP as acceptor,GO:0051287~NAD binding,	IPR000534:Semialdehyde dehydrogenase, NAD-binding,IPR016040:NAD(P)-binding domain,			SM00859:SM00859,	Complete proteome,	Cell envelope biogenesis, outer membrane / Carbohydrate transport and metabolism		1	633	0.00157978
STM14_4164	GJ0703GL000459	STY4339	ABC transporter ATP-binding protein(yheS)	S. Typhi str. CT18				GO:0005524~ATP binding,GO:0016887~ATPase activity,	IPR003439:ABC transporter-like,IPR003593:AAA+ ATPase domain,IPR017871:ABC transporter, conserved site,IPR027417:P-loop containing nucleoside triphosphate hydrolase,			SM00382:AAA,	ATP-binding,Coiled coil,Complete proteome,Nucleotide-binding,	General function prediction only		3	1905	0.0015748
STM14_5077	GJ0703GL004439	STY4419	lipoprotein(STY4419)	S. Typhi str. CT18					IPR021308:Protein of unknown function DUF2886,IPR023373:YmcC-like domain,				Complete proteome,Lipoprotein,Signal,			1	636	0.00157233
STM14_5294	GJ0703GL004252	STY4767	peptide methionine sulfoxide reductase(msrA)	S. Typhi str. CT18		GO:0006464~cellular protein modification process,GO:0006979~response to oxidative stress,GO:0030091~protein repair,		GO:0008113~peptide-methionine (S)-S-oxide reductase activity,	IPR002569:Peptide methionine sulphoxide reductase MsrA,				Complete proteome,Oxidoreductase,	Posttranslational modification, protein turnover, chaperones	chain:Peptide methionine sulfoxide reductase msrA,	1	636	0.00157233
STM14_3518	GJ0703GL001052	STY3041	sugar aldolase(STY3041)	S. Typhi str. CT18					IPR001303:Class II aldolase/adducin N-terminal,			SM01007:SM01007,	Complete proteome,	Carbohydrate transport and metabolism		1	636	0.00157233
STM14_2289	GJ0703GL002071	STY2091	bifunctional keto-hydroxyglutarate-aldolase/keto-deoxy-phosphogluconate aldolase(eda)	S. Typhi str. CT18						sty00030:Pentose phosphate pathway,sty00630:Glyoxylate and dicarboxylate metabolism,sty01100:Metabolic pathways,sty01120:Microbial metabolism in diverse environments,sty01200:Carbon metabolism,				Carbohydrate transport and metabolism		1	639	0.00156495
STM14_3892	GJ0703GL000699	STY3393	PadR family transcriptional regulator(STY3393)	S. Typhi str. CT18					IPR005149:Transcription regulator PadR N-terminal,IPR011991:Winged helix-turn-helix DNA-binding domain,				Complete proteome,	Transcription		1	642	0.00155763
STM14_1619	GJ0703GL002664	STY1778	threonyl-tRNA synthetase(STY1778)	S. Typhi str. CT18		GO:0006435~threonyl-tRNA aminoacylation,	GO:0005737~cytoplasm,	GO:0004829~threonine-tRNA ligase activity,GO:0005524~ATP binding,GO:0046872~metal ion binding,	IPR002314:Aminoacyl-tRNA synthetase, class II (G/ H/ P/ S), conserved domain,IPR002320:Threonine-tRNA ligase, class IIa,IPR004095:TGS,IPR004154:Anticodon-binding,IPR006195:Aminoacyl-tRNA synthetase, class II,IPR012675:Beta-grasp domain,IPR012676:TGS-like,IPR012947:Threonyl/alanyl tRNA synthetase, SAD,IPR018163:Threonyl/alanyl tRNA synthetase, class II-like, putative editing domain,	sty00970:Aminoacyl-tRNA biosynthesis,		SM00863:SM00863,	Aminoacyl-tRNA synthetase,ATP-binding,Complete proteome,Cytoplasm,Ligase,Metal-binding,Nucleotide-binding,Protein biosynthesis,Zinc,	Translation, ribosomal structure and biogenesis	chain:Threonyl-tRNA synthetase,metal ion-binding site:Zinc; catalytic,region of interest:Catalytic,	3	1926	0.00155763
STM14_4111	GJ0703GL000508	STY4389	16S rRNA m5C967 methyltransferase(sun)	S. Typhi str. CT18		GO:0006355~regulation of transcription, DNA-templated,	GO:0005737~cytoplasm,	GO:0003723~RNA binding,GO:0016434~rRNA (cytosine) methyltransferase activity,	IPR001678:Bacterial Fmu (Sun)/eukaryotic nucleolar NOL1/Nop2p,IPR004573:rRNA small subunit methyltransferase B,IPR006027:NusB/RsmB/TIM44,IPR018314:Bacterial Fmu (Sun)/eukaryotic nucleolar NOL1/Nop2p, conserved site,IPR023267:RNA (C5-cytosine) methyltransferase,IPR023541:rRNA small subunit methyltransferase B, enterobacteriaceae,				Complete proteome,Cytoplasm,Methyltransferase,RNA-binding,rRNA processing,S-adenosyl-L-methionine,Transferase,	Translation, ribosomal structure and biogenesis	active site:Nucleophile,binding site:S-adenosyl-L-methionine,chain:Ribosomal RNA small subunit methyltransferase B,region of interest:S-adenosyl-L-methionine binding,	2	1287	0.001554
STM14_0919	GJ0703GL003145	STY0826	adenosylmethionine--8-amino-7-oxononanoate aminotransferase BioA(STY0826)	S. Typhi str. CT18		GO:0009102~biotin biosynthetic process,	GO:0005737~cytoplasm,	GO:0004015~adenosylmethionine-8-amino-7-oxononanoate transaminase activity,GO:0030170~pyridoxal phosphate binding,	IPR005814:Aminotransferase class-III,IPR005815:Adenosylmethionine--8-amino-7-oxononanoate aminotransferase BioA,IPR015421:Pyridoxal phosphate-dependent transferase, major region, subdomain 1,IPR015422:Pyridoxal phosphate-dependent transferase, major region, subdomain 2,IPR015424:Pyridoxal phosphate-dependent transferase,	sty00780:Biotin metabolism,sty01100:Metabolic pathways,			Aminotransferase,Biotin biosynthesis,Complete proteome,Cytoplasm,Pyridoxal phosphate,S-adenosyl-L-methionine,Transferase,	Coenzyme metabolism	binding site:7-keto-8-aminopelargonic acid,binding site:7-keto-8-aminopelargonic acid; via carbonyl oxygen,binding site:Pyridoxal phosphate,chain:Adenosylmethionine-8-amino-7-oxononanoate aminotransferase,modified residue,region of interest:7-keto-8-aminopelargonic acid,region of interest:Pyridoxal phosphate binding,	2	1287	0.001554
STM14_2775	GJ0703GL001705	STY2472	nitrate/nitrite response regulator protein NarP(STY2472)	S. Typhi str. CT18		GO:0000160~phosphorelay signal transduction system,GO:0006351~transcription, DNA-templated,GO:0006355~regulation of transcription, DNA-templated,	GO:0005622~intracellular,	GO:0003677~DNA binding,	IPR000792:Transcription regulator LuxR, C-terminal,IPR001789:Signal transduction response regulator, receiver domain,IPR011006:CheY-like superfamily,IPR011991:Winged helix-turn-helix DNA-binding domain,IPR016032:Signal transduction response regulator, C-terminal effector,	sty02020:Two-component system,		SM00421:HTH_LUXR,SM00448:REC,	Complete proteome,DNA-binding,Transcription,Transcription regulation,	Signal transduction mechanisms / Transcription		1	645	0.00155039
STM14_5268	GJ0703GL004273	STY4742	3-keto-L-gulonate-6-phosphate decarboxylase UlaD(sgaH)	S. Typhi str. CT18		GO:0005975~carbohydrate metabolic process,GO:0006207~'de novo' pyrimidine nucleobase biosynthetic process,GO:0019854~L-ascorbic acid catabolic process,		GO:0000287~magnesium ion binding,GO:0004590~orotidine-5'-phosphate decarboxylase activity,GO:0033982~3-dehydro-L-gulonate-6-phosphate decarboxylase activity,	IPR001754:Orotidine 5'-phosphate decarboxylase domain,IPR011060:Ribulose-phosphate binding barrel,IPR013785:Aldolase-type TIM barrel,IPR023942:3-keto-L-gulonate-6-phosphate decarboxylase, UlaD,	sty00053:Ascorbate and aldarate metabolism,sty01100:Metabolic pathways,sty01120:Microbial metabolism in diverse environments,		SM00934:SM00934,	Carbohydrate metabolism,Complete proteome,Decarboxylase,Lyase,Magnesium,Metal-binding,	Carbohydrate transport and metabolism	binding site:Substrate,chain:3-keto-L-gulonate-6-phosphate decarboxylase ulaD,metal ion-binding site:Magnesium,site:Transition state stabilizer,	1	648	0.00154321
STM14_1523	GJ0703GL002736	STY1858	zinc/cadmium-binding protein(STY1858)	S. Typhi str. CT18				GO:0008270~zinc ion binding,	IPR011038:Calycin-like,IPR012674:Calycin,IPR015304:YodA,				Complete proteome,Signal,	General function prediction only		1	648	0.00154321
STM14_1576	GJ0703GL002699	STY1816	DNA topoisomerase III(STY1816)	S. Typhi str. CT18		GO:0006265~DNA topological change,		GO:0000287~magnesium ion binding,GO:0003677~DNA binding,GO:0003917~DNA topoisomerase type I activity,	IPR000380:DNA topoisomerase, type IA,IPR003601:DNA topoisomerase, type IA, domain 2,IPR003602:DNA topoisomerase, type IA, DNA-binding,IPR005738:DNA topoisomerase III, bacterial-type,IPR006171:Toprim domain,IPR013497:DNA topoisomerase, type IA, central,IPR013824:DNA topoisomerase, type IA, central region, subdomain 1,IPR013825:DNA topoisomerase, type IA, central region, subdomain 2,IPR023405:DNA t…			SM00436:TOP1Bc,SM00437:TOP1Ac,SM00493:TOPRIM,	Complete proteome,DNA-binding,Isomerase,Magnesium,Metal-binding,Topoisomerase,	DNA replication, recombination, and repair	active site:For DNA cleavage activity,chain:DNA topoisomerase 3,domain:Toprim,helix,strand,turn,	3	1947	0.00154083
STM14_3878	GJ0703GL000711	STY3381	adenylate cyclase(STY3381)	S. Typhi str. CT18	Function unknown,				IPR007899:CHAD,IPR023577:CYTH-like domain,			SM01118:SM01118,	Complete proteome,	Function unknown		2	1299	0.00153965
STM14_3252	GJ0703GL001295	STY2847	alpha-ketoglutarate permease(STY2847)	S. Typhi str. CT18			GO:0016021~integral component of membrane,	GO:0022857~transmembrane transporter activity,	IPR004736:Citrate-proton symport,IPR005828:General substrate transporter,IPR005829:Sugar transporter, conserved site,IPR020846:Major facilitator superfamily domain,				Complete proteome,Membrane,Transmembrane,Transmembrane helix,	Carbohydrate transport and metabolism		2	1299	0.00153965
STM14_4015	GJ0703GL000589	STY3506	isoprenoid biosynthesis protein(STY3506)	S. Typhi str. CT18					IPR002818:ThiJ/PfpI,IPR026041:Enhancing lycopene biosynthesis protein 2,		PIRSF006320:enhancing lycopene biosynthesis protein 2,		Complete proteome,	Secondary metabolites biosynthesis, transport, and catabolism		1	651	0.0015361
STM14_2566	GJ0703GL001877	STY2281	histidinol dehydrogenase(STY2281)	S. Typhi str. CT18	Amino acid transport and metabolism,	GO:0000105~histidine biosynthetic process,		GO:0004399~histidinol dehydrogenase activity,GO:0008270~zinc ion binding,GO:0051287~NAD binding,	IPR001692:Histidinol dehydrogenase, conserved site,IPR012131:Histidinol dehydrogenase,IPR016161:Aldehyde/histidinol dehydrogenase,IPR022695:Histidinol dehydrogenase, monofunctional,	sty00340:Histidine metabolism,sty01100:Metabolic pathways,sty01110:Biosynthesis of secondary metabolites,sty01230:Biosynthesis of amino acids,	PIRSF000099:histidinol dehydrogenase,		Amino-acid biosynthesis,Complete proteome,Histidine biosynthesis,Metal-binding,NAD,Oxidoreductase,Zinc,	Amino acid transport and metabolism	active site:Proton acceptor,binding site:NAD,binding site:Substrate,chain:Histidinol dehydrogenase,metal ion-binding site:Zinc,mutagenesis site,sequence conflict,	2	1302	0.0015361
STM14_0638	GJ0703GL003378	STY0593	outer membrane usher protein FimD(fimD)	S. Typhi str. CT18	Cell motility and secretion / Intracellular trafficking and secretion,		GO:0009279~cell outer membrane,GO:0016021~integral component of membrane,	GO:0005215~transporter activity,	IPR000015:Fimbrial biogenesis outer membrane usher protein,IPR018030:Fimbrial membrane usher, conserved site,IPR025885:PapC N-terminal domain,IPR025949:PapC-like C-terminal domain,				Cell outer membrane,Complete proteome,Fimbrium biogenesis,Membrane,Transmembrane,Transport,	Cell motility and secretion / Intracellular trafficking and secretion	chain:Outer membrane usher protein fimD,disulfide bond,sequence conflict,signal peptide,	4	2610	0.00153257
STM14_2282	GJ0703GL002078	STY2083	hypothetical protein(STY2083)	S. Typhi str. CT18	General function prediction only,	GO:0006807~nitrogen compound metabolic process,		GO:0016810~hydrolase activity, acting on carbon-nitrogen (but not peptide) bonds,	IPR003010:Carbon-nitrogen hydrolase,				Complete proteome,Hydrolase,	General function prediction only		1	654	0.00152905
STM14_1570	GJ0703GL002704	STY1821	pyrazinamidase/nicotinamidase(pncA)	S. Typhi str. CT18		GO:0008152~metabolic process,		GO:0016787~hydrolase activity,	IPR000868:Isochorismatase-like,	sty00760:Nicotinate and nicotinamide metabolism,sty01100:Metabolic pathways,			Complete proteome,Hydrolase,	Secondary metabolites biosynthesis, transport, and catabolism		1	654	0.00152905
STM14_3920	GJ0703GL000675	STY3418	hypothetical protein(STY3418)	S. Typhi str. CT18					IPR005130:Serine dehydratase-like, alpha subunit,IPR021144:Uncharacterised protein family UPF0597,		PIRSF006054:uncharacterized conserved protein,		Complete proteome,	Function unknown	chain:UPF0597 protein yhaM,	2	1308	0.00152905
STM14_1230	GJ0703GL002920	STY1112	hypothetical protein(STY1112)	S. Typhi str. CT18		GO:0043066~negative regulation of apoptotic process,	GO:0016021~integral component of membrane,		IPR006213:Bax inhibitor 1, conserved site,IPR006214:Bax inhibitor 1-related,				Complete proteome,Membrane,Transmembrane,Transmembrane helix,	General function prediction only		1	657	0.00152207
STM14_2285	GJ0703GL002075	STY2086	hypothetical protein(STY2086)	S. Typhi str. CT18					IPR007486:Protein of unknown function DUF533,				Complete proteome,	Function unknown		1	657	0.00152207
STM14_2877	GJ0703GL001615	STY2564	phosphatase(STY2564)	S. Typhi str. CT18	General function prediction only,	GO:0008152~metabolic process,		GO:0016787~hydrolase activity,	IPR006439:HAD-superfamily hydrolase, subfamily IA, variant 1,IPR023214:HAD-like domain,				Complete proteome,	General function prediction only		1	657	0.00152207
STM14_5283	GJ0703GL004261	STY4757	iron-sulfur cluster repair di-iron protein(ytfE)	S. Typhi str. CT18		GO:0006950~response to stress,GO:0030091~protein repair,	GO:0005737~cytoplasm,	GO:0046872~metal ion binding,	IPR012312:Haemerythrin/HHE cation-binding motif,IPR019903:Repair of iron centres family,IPR023742:Iron-sulfur cluster repair protein YftE,				Complete proteome,Cytoplasm,Iron,Metal-binding,Stress response,	Cell division and chromosome partitioning	chain:Regulator of cell morphogenesis and NO signaling,	1	660	0.00151515
STM14_4344	GJ0703GL000248	STY4194	metabolite transport protein(STY4194)	S. Typhi str. CT18			GO:0016021~integral component of membrane,	GO:0022857~transmembrane transporter activity,	IPR004736:Citrate-proton symport,IPR005828:General substrate transporter,IPR005829:Sugar transporter, conserved site,IPR011701:Major facilitator superfamily,IPR020846:Major facilitator superfamily domain,				Complete proteome,Membrane,Transmembrane,Transmembrane helix,	Carbohydrate transport and metabolism		2	1320	0.00151515
STM14_2356	GJ0703GL002018	STY2146	hypothetical protein(STY2146)	S. Typhi str. CT18					IPR004027:SEC-C motif,IPR011978:Uncharacterised protein family UPF0149,				Complete proteome,	General function prediction only		1	663	0.0015083
STM14_2728	GJ0703GL001727	STY2444	hypothetical protein(STY2444)	S. Typhi str. CT18			GO:0016021~integral component of membrane,						Complete proteome,Membrane,Transmembrane,Transmembrane helix,			1	663	0.0015083
STM14_4049	GJ0703GL000559	STY3537	transcriptional regulator(STY3537)	S. Typhi str. CT18	Transcription,	GO:0006351~transcription, DNA-templated,		GO:0003677~DNA binding,GO:0003700~transcription factor activity, sequence-specific DNA binding,	IPR000524:Transcription regulator HTH, GntR,IPR008920:Fatty acid responsive transcription factor FadR, C-terminal,IPR011711:GntR, C-terminal,IPR011991:Winged helix-turn-helix DNA-binding domain,			SM00345:HTH_GNTR,SM00895:SM00895,	Complete proteome,DNA-binding,Transcription,Transcription regulation,	Transcription		1	663	0.0015083
STM14_1040	GJ0703GL003049	STY0921	arginine ABC transporter permease ArtM(STY0921)	S. Typhi str. CT18			GO:0005886~plasma membrane,GO:0016021~integral component of membrane,	GO:0005215~transporter activity,	IPR000515:Binding-protein-dependent transport systems inner membrane component,IPR010065:Amino acid ABC transporter, permease protein, 3-TM domain, His/Glu/Gln/Arg/opine family,	sty02010:ABC transporters,			Cell membrane,Complete proteome,Membrane,Transmembrane,Transmembrane helix,Transport,	Amino acid transport and metabolism		1	666	0.0015015
STM14_5130	GJ0703GL004390	STY4465	glutathione S transferase(STY4465)	S. Typhi str. CT18	Posttranslational modification, protein turnover, chaperones,			GO:0016740~transferase activity,	IPR004045:Glutathione S-transferase, N-terminal,IPR004046:Glutathione S-transferase, C-terminal,IPR010987:Glutathione S-transferase, C-terminal-like,IPR012336:Thioredoxin-like fold,	sty00480:Glutathione metabolism,			Complete proteome,Transferase,	Posttranslational modification, protein turnover, chaperones		1	666	0.0015015
STM14_1606	GJ0703GL002673	STY1789	hydrolase(STY1789)	S. Typhi str. CT18	General function prediction only,	GO:0008152~metabolic process,		GO:0016787~hydrolase activity,	IPR006439:HAD-superfamily hydrolase, subfamily IA, variant 1,IPR023198:Phosphoglycolate phosphatase, domain 2,IPR023214:HAD-like domain,				Complete proteome,Hydrolase,	General function prediction only		1	666	0.0015015
STM14_2040	GJ0703GL002276	STY1371	phage shock protein A(STY1371)	S. Typhi str. CT18	Transcription / Signal transduction mechanisms,				IPR007157:PspA/IM30,IPR014319:Phage shock protein, PspA,				Coiled coil,Complete proteome,	Transcription / Signal transduction mechanisms		1	666	0.0015015
STM14_5517	GJ0703GL003973	STY4945	transcriptional regulator(STY4945)	S. Typhi str. CT18	Signal transduction mechanisms,								Complete proteome,	Signal transduction mechanisms		1	669	0.00149477
STM14_2982	GJ0703GL001478	STY2663	DNA ligase(STY2663)	S. Typhi str. CT18		GO:0006260~DNA replication,GO:0006281~DNA repair,		GO:0003677~DNA binding,GO:0003911~DNA ligase (NAD+) activity,GO:0046872~metal ion binding,	IPR001357:BRCT domain,IPR001679:NAD-dependent DNA ligase,IPR003583:Helix-hairpin-helix DNA-binding motif, class 1,IPR004149:Zinc-finger, NAD-dependent DNA ligase C4-type,IPR004150:NAD-dependent DNA ligase, OB-fold,IPR010994:RuvA domain 2-like,IPR012340:Nucleic acid-binding, OB-fold,IPR013839:NAD-dependent DNA ligase, adenylation,IPR013840:NAD-dependent DNA ligase, N-terminal,IPR018239:NAD-depende…	sty03030:DNA replication,sty03410:Base excision repair,sty03420:Nucleotide excision repair,sty03430:Mismatch repair,	PIRSF001604:DNA ligase (NAD), LigA type,	SM00278:HhH1,SM00292:BRCT,SM00532:LIGANc,	Complete proteome,DNA damage,DNA repair,DNA replication,Ligase,Magnesium,Manganese,Metal-binding,NAD,Zinc,	DNA replication, recombination, and repair	active site:N6-AMP-lysine intermediate,binding site:NAD,chain:DNA ligase,domain:BRCT,metal ion-binding site:Zinc,nucleotide phosphate-binding region:NAD,sequence conflict,	3	2013	0.00149031
STM14_0771	GJ0703GL003254	STY0708	glutamate/aspartate transport system permease GltK(STY0708)	S. Typhi str. CT18		GO:0006865~amino acid transport,	GO:0043190~ATP-binding cassette (ABC) transporter complex,	GO:0005215~transporter activity,	IPR000515:Binding-protein-dependent transport systems inner membrane component,IPR010065:Amino acid ABC transporter, permease protein, 3-TM domain, His/Glu/Gln/Arg/opine family,	sty02010:ABC transporters,sty02020:Two-component system,			Cell membrane,Complete proteome,Membrane,Transmembrane,Transmembrane helix,Transport,	Amino acid transport and metabolism		1	672	0.0014881
STM14_5464	GJ0703GL004070	STY4901	regulatory protein(STY4901)	S. Typhi str. CT18		GO:0006351~transcription, DNA-templated,GO:0006355~regulation of transcription, DNA-templated,		GO:0003677~DNA binding,	IPR000792:Transcription regulator LuxR, C-terminal,IPR011991:Winged helix-turn-helix DNA-binding domain,IPR016032:Signal transduction response regulator, C-terminal effector,			SM00421:HTH_LUXR,	Complete proteome,DNA-binding,Transcription,Transcription regulation,	Signal transduction mechanisms / Transcription		1	672	0.0014881
STM14_3077	GJ0703GL001393	STY2753	exodeoxyribonuclease large subunit(STY2753)	S. Typhi str. CT18		GO:0006308~DNA catabolic process,	GO:0005737~cytoplasm,GO:0009318~exodeoxyribonuclease VII complex,	GO:0003676~nucleic acid binding,GO:0008855~exodeoxyribonuclease VII activity,	IPR003753:Exonuclease VII, large subunit,IPR020579:Exonuclease VII, large subunit, C-terminal,IPR025824:OB-fold nucleic acid binding domain,	sty03430:Mismatch repair,			Complete proteome,Cytoplasm,Exonuclease,Hydrolase,Nuclease,	DNA replication, recombination, and repair	chain:Exodeoxyribonuclease 7 large subunit,	2	1347	0.00148478
STM14_2509	GJ0703GL001930	STY2224	cobalt transport protein CbiQ(cbiQ)	S. Typhi str. CT18		GO:0006824~cobalt ion transport,	GO:0005887~integral component of plasma membrane,GO:0043190~ATP-binding cassette (ABC) transporter complex,		IPR003339:ABC/ECF transporter, transmembrane component,IPR012809:ABC transporter CbiQ family,	sty02010:ABC transporters,			Complete proteome,Membrane,Transmembrane,Transmembrane helix,	Inorganic ion transport and metabolism	chain:Cobalt transport protein cbiQ,sequence conflict,transmembrane region,	1	675	0.00148148
STM14_5171	GJ0703GL004358	STY4497	alpha-galactosidase(STY4497)	S. Typhi str. CT18		GO:0005975~carbohydrate metabolic process,		GO:0016616~oxidoreductase activity, acting on the CH-OH group of donors, NAD or NADP as acceptor,GO:0052692~raffinose alpha-galactosidase activity,	IPR001088:Glycoside hydrolase, family 4,IPR015955:Lactate dehydrogenase/glycoside hydrolase, family 4, C-terminal,IPR016040:NAD(P)-binding domain,IPR019802:Glycoside hydrolase, family 4, conserved site,IPR022616:Glycosyl hydrolase, family 4, C-terminal,	sty00052:Galactose metabolism,sty00561:Glycerolipid metabolism,			Complete proteome,Glycosidase,Hydrolase,NAD,	Carbohydrate transport and metabolism	active site:Proton donor,binding site:Substrate,chain:Alpha-galactosidase,metal ion-binding site:Manganese,nucleotide phosphate-binding region:NAD,	2	1350	0.00148148
STM14_3247	GJ0703GL001299	STY2843	hypothetical protein(STY2843)	S. Typhi str. CT18					IPR005636:DTW,			SM01144:SM01144,	Complete proteome,	Function unknown		1	678	0.00147493
STM14_1109	GJ0703GL002977	STY0980	cytidylate kinase(STY0980)	S. Typhi str. CT18		GO:0006220~pyrimidine nucleotide metabolic process,	GO:0005737~cytoplasm,	GO:0004127~cytidylate kinase activity,GO:0005524~ATP binding,	IPR003136:Cytidylate kinase,IPR011994:Cytidylate kinase domain,IPR027417:P-loop containing nucleoside triphosphate hydrolase,	sty00240:Pyrimidine metabolism,sty01100:Metabolic pathways,			ATP-binding,Complete proteome,Cytoplasm,Kinase,Nucleotide-binding,Transferase,	Nucleotide transport and metabolism	chain:Cytidylate kinase,nucleotide phosphate-binding region:ATP,	1	681	0.00146843
STM14_0824	GJ0703GL003217	STY0746	potassium-transporting ATPase subunit B(STY0746)	S. Typhi str. CT18			GO:0005887~integral component of plasma membrane,	GO:0000287~magnesium ion binding,GO:0005524~ATP binding,GO:0008556~potassium-transporting ATPase activity,	IPR001757:Cation-transporting P-type ATPase,IPR006391:Potassium-transporting P-type ATPase, B chain, subfamily IA,IPR008250:P-type ATPase, A domain,IPR018303:P-type ATPase, phosphorylation site,IPR023214:HAD-like domain,IPR023299:P-type ATPase, cytoplasmic domain N,	sty02020:Two-component system,			ATP-binding,Cell inner membrane,Cell membrane,Complete proteome,Hydrolase,Ion transport,Magnesium,Membrane,Metal-binding,Nucleotide-binding,Phosphoprotein,Potassium,Potassium transport,Transmembrane,Transmembrane helix,Transport,	Inorganic ion transport and metabolism	active site:4-aspartylphosphate intermediate,chain:Potassium-transporting ATPase B chain,chain:Putative potassium-transporting ATPase B chain,metal ion-binding site:Magnesium,topological domain:Cytoplasmic,topological domain:Periplasmic,transmembrane region,	3	2046	0.00146628
STM14_0062	GJ0703GL003915	STY0061	transcriptional regulator Citb(citB)	S. Typhi str. CT18	Transcription / Signal transduction mechanisms,	GO:0000160~phosphorelay signal transduction system,GO:0006351~transcription, DNA-templated,GO:0006355~regulation of transcription, DNA-templated,GO:0009605~response to external stimulus,	GO:0005737~cytoplasm,	GO:0001071~nucleic acid binding transcription factor activity,GO:0003677~DNA binding,	IPR001789:Signal transduction response regulator, receiver domain,IPR011006:CheY-like superfamily,IPR024187:Signal transduction response regulator, citrate/malate metabolism,	sty02020:Two-component system,	PIRSF006171:response regulator of citrate/malate metabolism,	SM00448:REC,	Activator,Complete proteome,Cytoplasm,DNA-binding,Transcription,Transcription regulation,Two-component regulatory system,	Transcription / Signal transduction mechanisms	chain:Citrate utilization protein B,metal ion-binding site:Iron-sulfur 1 (4Fe-4S),metal ion-binding site:Iron-sulfur 2 (4Fe-4S),	1	684	0.00146199
STM14_1701	GJ0703GL002593	STY1715	pathogenicity island effector protein(sseG)	S. Typhi str. CT18			GO:0016021~integral component of membrane,			sty05132:Salmonella infection,			Complete proteome,Membrane,Transmembrane,Transmembrane helix,			1	687	0.0014556
STM14_5509	GJ0703GL003981	STY4935	two-component response regulator(STY4935)	S. Typhi str. CT18		GO:0000160~phosphorelay signal transduction system,GO:0006351~transcription, DNA-templated,GO:0006355~regulation of transcription, DNA-templated,	GO:0005622~intracellular,	GO:0003677~DNA binding,	IPR001789:Signal transduction response regulator, receiver domain,IPR001867:Signal transduction response regulator, C-terminal,IPR011006:CheY-like superfamily,IPR011991:Winged helix-turn-helix DNA-binding domain,IPR016032:Signal transduction response regulator, C-terminal effector,	sty02020:Two-component system,		SM00448:REC,SM00862:SM00862,	Complete proteome,DNA-binding,Transcription,Transcription regulation,Two-component regulatory system,	Signal transduction mechanisms / Transcription		1	687	0.0014556
STM14_1257	GJ0703GL002899	STY1141	4-hydroxyphenylacetate permease(hpaX)	S. Typhi str. CT18		GO:1900754~4-hydroxyphenylacetate transport,	GO:0016021~integral component of membrane,	GO:1901241~4-hydroxyphenylacetate transmembrane transporter activity,	IPR011701:Major facilitator superfamily,IPR012707:4-hydroxyphenylacetate permease,IPR020846:Major facilitator superfamily domain,				Complete proteome,Membrane,Transmembrane,Transmembrane helix,	Carbohydrate transport and metabolism		2	1374	0.0014556
STM14_4958	GJ0703GL004531	STY3750	argininosuccinate lyase(STY3750)	S. Typhi str. CT18		GO:0042450~arginine biosynthetic process via ornithine,	GO:0005737~cytoplasm,	GO:0004056~argininosuccinate lyase activity,	IPR000362:Fumarate lyase,IPR008948:L-Aspartase-like,IPR009049:Argininosuccinate lyase,IPR020557:Fumarate lyase, conserved site,IPR022761:Fumarate lyase, N-terminal,IPR024083:Fumarase/histidase, N-terminal,	sty00220:Arginine biosynthesis,sty00250:Alanine, aspartate and glutamate metabolism,sty01100:Metabolic pathways,sty01110:Biosynthesis of secondary metabolites,sty01130:Biosynthesis of antibiotics,sty01230:Biosynthesis of amino acids,			Amino-acid biosynthesis,Arginine biosynthesis,Complete proteome,Cytoplasm,Lyase,	Amino acid transport and metabolism	chain:Argininosuccinate lyase,	2	1374	0.0014556
STM14_5122	GJ0703GL004395	STY4460	type I secretion system protein(STY4460)	S. Typhi str. CT18	Defense mechanisms,		GO:0016021~integral component of membrane,	GO:0005524~ATP binding,GO:0042626~ATPase activity, coupled to transmembrane movement of substances,	IPR003439:ABC transporter-like,IPR003593:AAA+ ATPase domain,IPR011527:ABC transporter, transmembrane domain, type 1,IPR027417:P-loop containing nucleoside triphosphate hydrolase,			SM00382:AAA,	Complete proteome,Membrane,Transmembrane,Transmembrane helix,	Defense mechanisms		3	2064	0.00145349
STM14_1103	GJ0703GL002982	STY0976	hypothetical protein(STY0976)	S. Typhi str. CT18			GO:0016021~integral component of membrane,		IPR007353:Protein of unknown function DUF421,IPR023090:Uncharacterised domain UPF0702, alpha/beta domain,				Complete proteome,Membrane,Transmembrane,Transmembrane helix,	Function unknown		1	690	0.00144928
STM14_2787	GJ0703GL001693	STY2484	ferredoxin-type protein NapG(STY2484)	S. Typhi str. CT18					IPR004494:MauM/NapG ferredoxin-type protein,IPR006311:Twin-arginine translocation pathway, signal sequence,IPR017896:4Fe-4S ferredoxin-type, iron-sulpur binding domain,IPR017900:4Fe-4S ferredoxin, iron-sulphur binding, conserved site,				Complete proteome,	Energy production and conversion	signal peptide,	1	693	0.001443
STM14_2540	GJ0703GL001900	STY2256	CoA-dependent proprionaldehyde dehydrogenase(pduP)	S. Typhi str. CT18				GO:0016620~oxidoreductase activity, acting on the aldehyde or oxo group of donors, NAD or NADP as acceptor,	IPR012408:Acetaldehyde/propionaldehyde dehydrogenase, EutE/PduP-related,IPR015590:Aldehyde dehydrogenase domain,IPR016161:Aldehyde/histidinol dehydrogenase,IPR016162:Aldehyde dehydrogenase, N-terminal,IPR016163:Aldehyde dehydrogenase, C-terminal,	sty00640:Propanoate metabolism,	PIRSF036410:acetaldehyde/propionaldehyde dehydrogenase, EutE/PduP type,		Complete proteome,			2	1392	0.00143678
STM14_4685	GJ0703GL004759	STY3888	GntR family transcriptional regulator(STY3888)	S. Typhi str. CT18	Transcription,	GO:0006351~transcription, DNA-templated,		GO:0003677~DNA binding,GO:0003700~transcription factor activity, sequence-specific DNA binding,	IPR000524:Transcription regulator HTH, GntR,IPR008920:Fatty acid responsive transcription factor FadR, C-terminal,IPR011711:GntR, C-terminal,IPR011991:Winged helix-turn-helix DNA-binding domain,			SM00345:HTH_GNTR,SM00895:SM00895,	Complete proteome,DNA-binding,Transcription,Transcription regulation,	Transcription		1	702	0.0014245
STM14_3744	GJ0703GL000838	STY3253	hypothetical protein(STY3253)	S. Typhi str. CT18					IPR001608:Alanine racemase, N-terminal,IPR011078:Uncharacterised protein family UPF0001,		PIRSF004848:pyridoxal 5'-phosphate-dependent enzyme, YBL036c type,		Complete proteome,Pyridoxal phosphate,	General function prediction only		1	702	0.0014245
STM14_4389	GJ0703GL000212	STY4161	hypothetical protein(STY4161)	S. Typhi str. CT18			GO:0019867~outer membrane,		IPR005546:Autotransporter beta-domain,IPR006315:Outer membrane autotransporter barrel,IPR016955:Autotransporter, YhjY, predicted,		PIRSF030748:autotransporter, YhjY type,		Complete proteome,Signal,	Cell motility and secretion	signal peptide,	1	702	0.0014245
STM14_0178	GJ0703GL003811	STY0171	symporter(STY0171)	S. Typhi str. CT18	Carbohydrate transport and metabolism,	GO:0006814~sodium ion transport,	GO:0016020~membrane,	GO:0005215~transporter activity,	IPR001927:Sodium:galactoside symporter,IPR020846:Major facilitator superfamily domain,				Complete proteome,	Carbohydrate transport and metabolism		2	1404	0.0014245
STM14_2392	GJ0703GL001987	STY2179	flagellar assembly protein FliH(STY2179)	S. Typhi str. CT18		GO:0071973~bacterial-type flagellum-dependent cell motility,	GO:0009288~bacterial-type flagellum,GO:0031514~motile cilium,	GO:0003774~motor activity,	IPR000563:Flagellar assembly protein FliH,IPR018035:Flagellar assembly protein FliH/Type III secretion system HrpE,	sty02040:Flagellar assembly,			Cell projection,Cilium,Complete proteome,Flagellum,	Cell motility and secretion / Intracellular trafficking and secretion	chain:Flagellar assembly protein fliH,	1	705	0.00141844
STM14_0285	GJ0703GL003696	STY0270	hypothetical protein(STY0270)	S. Typhi str. CT18				GO:0008168~methyltransferase activity,	IPR023368:Uncharacterised protein family UPF0066, conserved site,IPR023370:Uncharacterised domain UPF0066, YaeB-like domain,				Complete proteome,Methyltransferase,Transferase,	Function unknown		1	705	0.00141844
STM14_3714	GJ0703GL000874	STY3231	hypothetical protein(STY3231)	S. Typhi str. CT18			GO:0016021~integral component of membrane,		IPR003339:ABC/ECF transporter, transmembrane component,	sty02010:ABC transporters,			Complete proteome,Membrane,Transmembrane,Transmembrane helix,	Inorganic ion transport and metabolism		1	705	0.00141844
STM14_4749	GJ0703GL004709	STY3611	hypothetical protein(STY3611)	S. Typhi str. CT18					IPR007435:Protein of unknown function DUF484,				Complete proteome,	Function unknown	chain:Uncharacterized protein yigA,sequence conflict,	1	705	0.00141844
STM14_0125	GJ0703GL003860	STY0123	thiamine ABC transporter ATP-binding protein(STY0123)	S. Typhi str. CT18		GO:0015888~thiamine transport,	GO:0043190~ATP-binding cassette (ABC) transporter complex,	GO:0005524~ATP binding,GO:0048502~thiamine-transporting ATPase activity,	IPR003439:ABC transporter-like,IPR003593:AAA+ ATPase domain,IPR005968:Thiamine ABC transporter, ATP-binding protein ThiQ,IPR017871:ABC transporter, conserved site,IPR027417:P-loop containing nucleoside triphosphate hydrolase,	sty02010:ABC transporters,		SM00382:AAA,	ATP-binding,Cell inner membrane,Cell membrane,Complete proteome,Hydrolase,Membrane,Nucleotide-binding,Transport,	Coenzyme metabolism	chain:Thiamine import ATP-binding protein thiQ,domain:ABC transporter,nucleotide phosphate-binding region:ATP,	1	705	0.00141844
STM14_3533	GJ0703GL001037	STY3055	2-C-methyl-D-erythritol 4-phosphate cytidylyltransferase(ygbP)	S. Typhi str. CT18		GO:0016114~terpenoid biosynthetic process,GO:0019288~isopentenyl diphosphate biosynthetic process, methylerythritol 4-phosphate pathway,		GO:0050518~2-C-methyl-D-erythritol 4-phosphate cytidylyltransferase activity,	IPR001228:4-diphosphocytidyl-2C-methyl-D-erythritol synthase,IPR018294:4-diphosphocytidyl-2C-methyl-D-erythritol synthase, conserved site,	sty00900:Terpenoid backbone biosynthesis,sty01100:Metabolic pathways,sty01110:Biosynthesis of secondary metabolites,sty01130:Biosynthesis of antibiotics,			Complete proteome,Isoprene biosynthesis,Nucleotidyltransferase,Transferase,	Lipid metabolism	chain:2-C-methyl-D-erythritol 4-phosphate cytidylyltransferase,site:Positions MEP for the nucleophilic attack,site:Transition state stabilizer,	1	708	0.00141243
STM14_0218	GJ0703GL003758	STY0209	poly(A) polymerase(STY0209)	S. Typhi str. CT18		GO:0006351~transcription, DNA-templated,GO:0006378~mRNA polyadenylation,		GO:0003723~RNA binding,GO:0004652~polynucleotide adenylyltransferase activity,GO:0005524~ATP binding,	IPR002646:Poly A polymerase, head domain,IPR010206:Poly(A) polymerase, PcnB,IPR025866:Polymerase A arginine-rich C-terminal domain,	sty03018:RNA degradation,			ATP-binding,Complete proteome,mRNA processing,Nucleotide-binding,RNA-binding,Transcription,Transferase,	Translation, ribosomal structure and biogenesis		2	1416	0.00141243
STM14_3675	GJ0703GL000908	STY3199	thiol:disulfide interchange protein(STY3199)	S. Typhi str. CT18		GO:0045454~cell redox homeostasis,	GO:0005623~cell,	GO:0016853~isomerase activity,	IPR009094:Disulphide bond isomerase, DsbC, N-terminal,IPR012336:Thioredoxin-like fold,IPR017937:Thioredoxin, conserved site,IPR018950:Disulphide bond isomerase, DsbC/G, N-terminal,				Complete proteome,Isomerase,Signal,	Posttranslational modification, protein turnover, chaperones	chain:Thiol:disulfide interchange protein dsbC,disulfide bond,sequence conflict,signal peptide,	1	711	0.00140647
STM14_2138	GJ0703GL002198	STY1284	invasin(STY1284)	S. Typhi str. CT18					IPR024519:Domain of unknown function DUF3442, intimin/invasin,				Complete proteome,			2	1422	0.00140647
STM14_5172	GJ0703GL004357	STY4498	melibiose carrier protein(melB)	S. Typhi str. CT18		GO:0006814~sodium ion transport,	GO:0016021~integral component of membrane,	GO:0005215~transporter activity,	IPR001927:Sodium:galactoside symporter,IPR018043:Sodium:galactoside symporter, conserved site,IPR020846:Major facilitator superfamily domain,				Complete proteome,Membrane,Transmembrane,Transmembrane helix,	Carbohydrate transport and metabolism	chain:Melibiose carrier protein,sequence conflict,topological domain:Cytoplasmic,topological domain:Periplasmic,transmembrane region,	2	1428	0.00140056
STM14_1048	GJ0703GL003041	STY0929	hypothetical protein(STY0929)	S. Typhi str. CT18	Cell envelope biogenesis, outer membrane / Carbohydrate transport and metabolism,		GO:0016021~integral component of membrane,		IPR016040:NAD(P)-binding domain,IPR021295:Protein of unknown function DUF2867,				Complete proteome,Membrane,Transmembrane,Transmembrane helix,	Cell envelope biogenesis, outer membrane / Carbohydrate transport and metabolism		2	1431	0.00139762
STM14_3986	GJ0703GL000616	STY3479	penicillin-binding protein(STY3479)	S. Typhi str. CT18				GO:0004185~serine-type carboxypeptidase activity,	IPR000667:Peptidase S13, D-Ala-D-Ala carboxypeptidase C,IPR012338:Beta-lactamase/transpeptidase-like,	sty00550:Peptidoglycan biosynthesis,			Carboxypeptidase,Complete proteome,Hydrolase,Protease,Signal,	Cell envelope biogenesis, outer membrane		2	1431	0.00139762
STM14_2735	GJ0703GL001723	STY2449	hypothetical protein(STY2449)	S. Typhi str. CT18		GO:0009103~lipopolysaccharide biosynthetic process,GO:0009245~lipid A biosynthetic process,GO:0043165~Gram-negative-bacterium-type cell outer membrane assembly,	GO:0005887~integral component of plasma membrane,	GO:0016776~phosphotransferase activity, phosphate group as acceptor,GO:0050380~undecaprenyl-diphosphatase activity,	IPR000326:Phosphatidic acid phosphatase type 2/haloperoxidase,			SM00014:acidPPc,	Cell inner membrane,Cell membrane,Complete proteome,Lipopolysaccharide biosynthesis,Membrane,Transferase,Transmembrane,Transmembrane helix,	Lipid metabolism		1	717	0.0013947
STM14_3752	GJ0703GL000830	STY3262	hypothetical protein(STY3262)	S. Typhi str. CT18					IPR021307:Protein of unknown function DUF2884,				Complete proteome,Signal,			1	717	0.0013947
STM14_5490	GJ0703GL004001	STY4921	purine nucleoside phosphorylase(deoD)	S. Typhi str. CT18		GO:0042278~purine nucleoside metabolic process,		GO:0004731~purine-nucleoside phosphorylase activity,	IPR000845:Nucleoside phosphorylase domain,IPR004402:Purine nucleoside phosphorylase DeoD-type,IPR018016:Nucleoside phosphorylase, conserved site,IPR018017:Nucleoside phosphorylase,	sty00230:Purine metabolism,sty00240:Pyrimidine metabolism,sty00760:Nicotinate and nicotinamide metabolism,sty01100:Metabolic pathways,sty01110:Biosynthesis of secondary metabolites,			Complete proteome,Glycosyltransferase,Transferase,	Nucleotide transport and metabolism	chain:Purine nucleoside phosphorylase deoD- type,	1	717	0.0013947
STM14_3754	GJ0703GL000828	STY3264	tRNA m(7)G46 methyltransferase(STY3264)	S. Typhi str. CT18				GO:0008176~tRNA (guanine-N7-)-methyltransferase activity,	IPR003358:tRNA (guanine-N-7) methyltransferase,				Complete proteome,Methyltransferase,S-adenosyl-L-methionine,Transferase,tRNA processing,	General function prediction only	binding site:S-adenosyl-L-methionine,binding site:Substrate,chain:tRNA (guanine-N(7)-)-methyltransferase,region of interest:Interaction with RNA,region of interest:Substrate binding,	1	717	0.0013947
STM14_2368	GJ0703GL002009	STY2158	cell-division regulatory protein(STY2158)	S. Typhi str. CT18		GO:0006351~transcription, DNA-templated,GO:0006355~regulation of transcription, DNA-templated,		GO:0003677~DNA binding,	IPR000792:Transcription regulator LuxR, C-terminal,IPR005143:Transcription factor LuxR-like, autoinducer-binding domain,IPR011991:Winged helix-turn-helix DNA-binding domain,IPR016032:Signal transduction response regulator, C-terminal effector,	sty02020:Two-component system,		SM00421:HTH_LUXR,	Complete proteome,DNA-binding,Transcription,Transcription regulation,	Transcription		1	720	0.00138889
STM14_0915	GJ0703GL003149	STY0822	histidine utilization repressor(hutC)	S. Typhi str. CT18		GO:0006351~transcription, DNA-templated,GO:0006547~histidine metabolic process,GO:0045892~negative regulation of transcription, DNA-templated,		GO:0003677~DNA binding,GO:0003700~transcription factor activity, sequence-specific DNA binding,	IPR000524:Transcription regulator HTH, GntR,IPR010248:Histidine utilization repressor,IPR011663:UbiC transcription regulator-associated,IPR011991:Winged helix-turn-helix DNA-binding domain,			SM00345:HTH_GNTR,SM00866:SM00866,	Complete proteome,DNA-binding,Transcription,Transcription regulation,	Transcription	chain:Urocanate hydratase,	1	723	0.00138313
STM14_2515	GJ0703GL001924	STY2232	precorrin-3 C17-methyltransferase(cbiH)	S. Typhi str. CT18		GO:0009236~cobalamin biosynthetic process,		GO:0030789~precorrin-3B C17-methyltransferase activity,	IPR000878:Tetrapyrrole methylase,IPR006363:Cobalamin (vitamin B12) biosynthesis CobJ/CibH, precorrin-3B C17-methyltransferase, core,IPR014776:Tetrapyrrole methylase, subdomain 2,IPR014777:Tetrapyrrole methylase, subdomain 1,	sty00860:Porphyrin and chlorophyll metabolism,sty01100:Metabolic pathways,			Complete proteome,Methyltransferase,Transferase,	Coenzyme metabolism	chain:Cobalt-precorrin-3B C(17)- methyltransferase,	1	723	0.00138313
STM14_0503	GJ0703GL003504	STY0464	thiamine biosynthesis protein ThiI(STY0464)	S. Typhi str. CT18		GO:0009228~thiamine biosynthetic process,GO:0009229~thiamine diphosphate biosynthetic process,GO:0034227~tRNA thio-modification,GO:0052837~thiazole biosynthetic process,	GO:0005737~cytoplasm,	GO:0000049~tRNA binding,GO:0004810~tRNA adenylyltransferase activity,GO:0005524~ATP binding,GO:0016783~sulfurtransferase activity,	IPR001763:Rhodanese-like domain,IPR003720:Thiamine biosynthesis/tRNA sulfurtransferase ThiI,IPR004114:THUMP,IPR014729:Rossmann-like alpha/beta/alpha sandwich fold,IPR020536:Thil, C-terminal domain,IPR026340:Thiazole biosynthesis domain,	sty00730:Thiamine metabolism,sty01100:Metabolic pathways,sty04122:Sulfur relay system,		SM00981:SM00981,	ATP-binding,Complete proteome,Cytoplasm,Disulfide bond,Nucleotide-binding,Redox-active center,RNA-binding,Thiamine biosynthesis,Transferase,tRNA-binding,	Coenzyme metabolism	active site:Cysteine persulfide intermediate,chain:Thiamine biosynthesis protein thiI,domain:Rhodanese,domain:THUMP,	2	1446	0.00138313
STM14_4079	GJ0703GL000534	STY3562	sodium/pantothenate symporter(STY3562)	S. Typhi str. CT18		GO:0071436~sodium ion export,	GO:0005886~plasma membrane,GO:0016021~integral component of membrane,	GO:0015081~sodium ion transmembrane transporter activity,GO:0015233~pantothenate transmembrane transporter activity,GO:0031402~sodium ion binding,	IPR001734:Sodium/solute symporter,IPR011849:Sodium/pantothenate symporter,IPR018212:Sodium/solute symporter, conserved site,				Cell membrane,Complete proteome,Membrane,Transmembrane,Transmembrane helix,	Coenzyme metabolism		2	1449	0.00138026
STM14_4014	GJ0703GL000590	STY3505	monofunctional biosynthetic peptidoglycan transglycosylase(mtgA)	S. Typhi str. CT18		GO:0008360~regulation of cell shape,GO:0009252~peptidoglycan biosynthetic process,GO:0071555~cell wall organization,	GO:0005886~plasma membrane,GO:0009274~peptidoglycan-based cell wall,GO:0016021~integral component of membrane,	GO:0016763~transferase activity, transferring pentosyl groups,	IPR001264:Glycosyl transferase, family 51,IPR011812:Monofunctional biosynthetic peptidoglycan transglycosylase,IPR023346:Lysozyme-like domain,	sty00550:Peptidoglycan biosynthesis,			Cell membrane,Cell shape,Cell wall biogenesis/degradation,Complete proteome,Membrane,Peptidoglycan synthesis,Transferase,Transmembrane,Transmembrane helix,	Cell envelope biogenesis, outer membrane	chain:Monofunctional biosynthetic peptidoglycan transglycosylase,transmembrane region,	1	726	0.00137741
STM14_2028	GJ0703GL002286	STY1383	murein peptide amidase A(STY1383)	S. Typhi str. CT18				GO:0004181~metallocarboxypeptidase activity,GO:0008270~zinc ion binding,	IPR000834:Peptidase M14, carboxypeptidase A,				Complete proteome,	Amino acid transport and metabolism		1	726	0.00137741
STM14_3738	GJ0703GL000844	STY3247	16S rRNA (uracil(1498)-N(3))-methyltransferase(STY3247)	S. Typhi str. CT18		GO:0006364~rRNA processing,	GO:0005737~cytoplasm,	GO:0008168~methyltransferase activity,	IPR006700:Ribosomal RNA small subunit methyltransferase E,IPR015947:PUA-like domain,		PIRSF015601:S-adenosyl-L-methionine dependent RNA methyltransferase, slr0722 type,		Complete proteome,Cytoplasm,Methyltransferase,rRNA processing,S-adenosyl-L-methionine,Transferase,	Function unknown		1	729	0.00137174
STM14_2666	GJ0703GL001777	STY2392	ABC transporter permease(STY2392)	S. Typhi str. CT18		GO:0006810~transport,	GO:0005886~plasma membrane,GO:0016021~integral component of membrane,		IPR000515:Binding-protein-dependent transport systems inner membrane component,	sty02010:ABC transporters,			Complete proteome,Membrane,Transmembrane,Transmembrane helix,Transport,	Amino acid transport and metabolism	signal peptide,	1	729	0.00137174
STM14_5014	GJ0703GL004492	STY3712	two-component system sensor protein(STY3712)	S. Typhi str. CT18			GO:0005622~intracellular,GO:0005886~plasma membrane,GO:0016021~integral component of membrane,	GO:0000155~phosphorelay sensor kinase activity,GO:0005524~ATP binding,	IPR003594:Histidine kinase-like ATPase, ATP-binding domain,IPR003661:Signal transduction histidine kinase, subgroup 1, dimerisation/phosphoacceptor domain,IPR004358:Signal transduction histidine kinase-related protein, C-terminal,IPR005467:Signal transduction histidine kinase, core,	sty02020:Two-component system,		SM00387:HATPase_c,SM00388:HisKA,	ATP-binding,Cell inner membrane,Cell membrane,Complete proteome,Kinase,Membrane,Nucleotide-binding,Phosphoprotein,Transferase,Transmembrane,Transmembrane helix,Two-component regulatory system,Zinc,	Signal transduction mechanisms	chain:Sensor protein zraS,domain:Histidine kinase,modified residue,transmembrane region,	2	1461	0.00136893
STM14_4304	GJ0703GL000344	STY4235	heavy metal-transporting ATPase(STY4235)	S. Typhi str. CT18		GO:0030001~metal ion transport,	GO:0005886~plasma membrane,GO:0016021~integral component of membrane,	GO:0000166~nucleotide binding,GO:0019829~cation-transporting ATPase activity,GO:0046872~metal ion binding,	IPR001757:Cation-transporting P-type ATPase,IPR006121:Heavy metal-associated domain, HMA,IPR008250:P-type ATPase, A domain,IPR017969:Heavy-metal-associated, conserved site,IPR018303:P-type ATPase, phosphorylation site,IPR023214:HAD-like domain,IPR023299:P-type ATPase, cytoplasmic domain N,IPR027256:Cation-transporting P-type ATPase, subfamily IB,				Complete proteome,Hydrolase,Membrane,Transmembrane,Transmembrane helix,			3	2196	0.00136612
STM14_3859	GJ0703GL000728	STY3364	outer membrane protein TolC(tolC)	S. Typhi str. CT18			GO:0019867~outer membrane,	GO:0005215~transporter activity,	IPR003423:Outer membrane efflux protein,IPR010130:Type I secretion outer membrane protein, TolC,	sty01501:beta-Lactam resistance,sty01503:Cationic antimicrobial peptide (CAMP) resistance,sty03070:Bacterial secretion system,			Complete proteome,Signal,	Cell envelope biogenesis, outer membrane / Intracellular trafficking and secretion	signal peptide,	2	1467	0.00136333
STM14_4866	GJ0703GL004608	STY3826	rhamnulokinase(STY3826)	S. Typhi str. CT18		GO:0019301~rhamnose catabolic process,		GO:0005524~ATP binding,GO:0008993~rhamnulokinase activity,	IPR013449:Rhamnulokinase,IPR018484:Carbohydrate kinase, FGGY, N-terminal,IPR018485:Carbohydrate kinase, FGGY, C-terminal,	sty00040:Pentose and glucuronate interconversions,sty00051:Fructose and mannose metabolism,sty01120:Microbial metabolism in diverse environments,			ATP-binding,Complete proteome,Disulfide bond,Kinase,Magnesium,Nucleotide-binding,Rhamnose metabolism,Transferase,	Carbohydrate transport and metabolism	binding site:ATP,binding site:Substrate,chain:Rhamnulokinase,region of interest:Substrate binding,	2	1467	0.00136333
STM14_2400	GJ0703GL001979	STY2187	flagellar biosynthetic protein FliP(STY2187)	S. Typhi str. CT18		GO:0009306~protein secretion,GO:0044781~bacterial-type flagellum organization,	GO:0005886~plasma membrane,GO:0009425~bacterial-type flagellum basal body,GO:0016021~integral component of membrane,GO:0031514~motile cilium,		IPR005837:Flagellar transport protein FliP,IPR005838:Type III secretion system inner membrane P protein,	sty02040:Flagellar assembly,			Bacterial flagellum biogenesis,Bacterial flagellum protein export,Cell membrane,Cell projection,Cilium,Complete proteome,Flagellum,Membrane,Protein transport,Signal,Transmembrane,Transmembrane helix,Transport,	Cell motility and secretion / Intracellular trafficking and secretion	chain:Flagellar biosynthetic protein fliP,signal peptide,transmembrane region,	1	735	0.00136054
STM14_4706	GJ0703GL004746	STY3648	ketol-acid reductoisomerase(STY3648)	S. Typhi str. CT18		GO:0009097~isoleucine biosynthetic process,GO:0009099~valine biosynthetic process,		GO:0000166~nucleotide binding,GO:0000287~magnesium ion binding,GO:0004455~ketol-acid reductoisomerase activity,	IPR000506:Acetohydroxy acid isomeroreductase C-terminal,IPR008927:6-phosphogluconate dehydrogenase, C-terminal-like,IPR013023:Acetohydroxy acid isomeroreductase,IPR013116:Acetohydroxy acid isomeroreductase, catalytic,IPR013328:Dehydrogenase, multihelical,IPR016040:NAD(P)-binding domain,	sty00290:Valine, leucine and isoleucine biosynthesis,sty00770:Pantothenate and CoA biosynthesis,sty01100:Metabolic pathways,sty01110:Biosynthesis of secondary metabolites,sty01130:Biosynthesis of antibiotics,sty01210:2-Oxocarboxylic acid metabolism,sty01230:Biosynthesis of amino acids,			Amino-acid biosynthesis,Branched-chain amino acid biosynthesis,Complete proteome,Magnesium,Metal-binding,NADP,Nucleotide-binding,Oxidoreductase,Repeat,	Amino acid transport and metabolism / Coenzyme metabolism	chain:Ketol-acid reductoisomerase,	2	1473	0.00135777
STM14_4727	GJ0703GL004724	STY3626	UDP-N-acetyl-D-mannosaminuronic acid transferase(STY3626)	S. Typhi str. CT18		GO:0009246~enterobacterial common antigen biosynthetic process,		GO:0047241~lipopolysaccharide N-acetylmannosaminouronosyltransferase activity,	IPR004629:Glycosyl transferase WecB/TagA/CpsF,IPR023085:UDP-N-acetyl-D-mannosaminuronic acid transferase, bacteria,				Complete proteome,Glycosyltransferase,Transferase,	Cell envelope biogenesis, outer membrane	chain:Probable UDP-N-acetyl-D-mannosaminuronic acid transferase,	1	738	0.00135501
STM14_4543	GJ0703GL000075	STY4018	hypothetical protein(STY4018)	S. Typhi str. CT18				GO:0003824~catalytic activity,	IPR010763:Protein of unknown function DUF1341,	sty00030:Pentose phosphate pathway,sty01100:Metabolic pathways,sty01120:Microbial metabolism in diverse environments,			Complete proteome,			1	741	0.00134953
STM14_1900	GJ0703GL002415	STY1491	methyl viologen resistance protein SmvA(smvA)	S. Typhi str. CT18		GO:0055085~transmembrane transport,	GO:0016021~integral component of membrane,		IPR011701:Major facilitator superfamily,IPR020846:Major facilitator superfamily domain,				Complete proteome,Membrane,Transmembrane,Transmembrane helix,	Carbohydrate transport and metabolism	chain:Methyl viologen resistance protein smvA,sequence conflict,signal peptide,transmembrane region,	2	1485	0.0013468
STM14_4910	GJ0703GL004566	STY3786	ferredoxin--NADP reductase(STY3786)	S. Typhi str. CT18				GO:0004324~ferredoxin-NADP+ reductase activity,	IPR001433:Oxidoreductase FAD/NAD(P)-binding,IPR008333:Oxidoreductase, FAD-binding domain,IPR017927:Ferredoxin reductase-type FAD-binding domain,IPR017938:Riboflavin synthase-like beta-barrel,				Complete proteome,	Energy production and conversion		1	744	0.00134409
STM14_5262	GJ0703GL004279	STY4736	esterase(yjfP)	S. Typhi str. CT18					IPR022742:Alpha/beta hydrolase, N-terminal,				Complete proteome,	General function prediction only		1	747	0.00133869
STM14_4676	GJ0703GL004768	STY3899	regulatory ATPase RavA(STY3899)	S. Typhi str. CT18	General function prediction only,		GO:0005737~cytoplasm,	GO:0005524~ATP binding,GO:0016820~hydrolase activity, acting on acid anhydrides, catalyzing transmembrane movement of substances,GO:0016887~ATPase activity,	IPR003593:AAA+ ATPase domain,IPR011704:ATPase, dynein-related, AAA domain,IPR022547:ATPase, RavA, C-terminal,IPR023671:ATPase RavA,IPR027417:P-loop containing nucleoside triphosphate hydrolase,			SM00382:AAA,	ATP-binding,Complete proteome,Cytoplasm,Hydrolase,Nucleotide-binding,	General function prediction only	chain:ATPase ravA,	2	1494	0.00133869
STM14_0896	GJ0703GL003166	STY0804	2,3-bisphosphoglycerate-dependent phosphoglycerate mutase(STY0804)	S. Typhi str. CT18		GO:0006094~gluconeogenesis,GO:0006096~glycolytic process,		GO:0046538~2,3-bisphosphoglycerate-dependent phosphoglycerate mutase activity,	IPR001345:Phosphoglycerate/bisphosphoglycerate mutase, active site,IPR005952:Phosphoglycerate mutase 1,IPR013078:Histidine phosphatase superfamily, clade-1,	sty00010:Glycolysis / Gluconeogenesis,sty00260:Glycine, serine and threonine metabolism,sty00680:Methane metabolism,sty01100:Metabolic pathways,sty01110:Biosynthesis of secondary metabolites,sty01120:Microbial metabolism in diverse environments,sty01130:Biosynthesis of antibiotics,sty01200:Carbon metabolism,sty01230:Biosynthesis of amino acids,		SM00855:SM00855,	Complete proteome,Gluconeogenesis,Glycolysis,Isomerase,	Carbohydrate transport and metabolism	active site:Tele-phosphohistidine intermediate,chain:2,3-bisphosphoglycerate-dependent phosphoglycerate mutase,site:Interaction with carboxyl group of phosphoglycerates,	1	750	0.00133333
STM14_3846	GJ0703GL000741	STY3351	topoisomerase IV subunit A(STY3351)	S. Typhi str. CT18		GO:0006265~DNA topological change,GO:0007059~chromosome segregation,	GO:0005694~chromosome,GO:0019897~extrinsic component of plasma membrane,	GO:0003677~DNA binding,GO:0003918~DNA topoisomerase type II (ATP-hydrolyzing) activity,GO:0005524~ATP binding,	IPR002205:DNA topoisomerase, type IIA, subunit A/C-terminal,IPR005742:DNA topoisomerase IV, subunit A, Gram-negative,IPR006691:DNA gyrase/topoisomerase IV, subunit A, C-terminal beta-pinwheel,IPR013758:DNA topoisomerase, type IIA, subunit A/ C-terminal, alpha-beta,IPR013760:DNA topoisomerase, type IIA-like domain,IPR024946:Arginine repressor C-terminal-like domain,			SM00434:TOP4c,	Cell membrane,Coiled coil,Complete proteome,DNA-binding,Isomerase,Membrane,Topoisomerase,	DNA replication, recombination, and repair	active site:O-(5'-phospho-DNA)-tyrosine intermediate,chain:DNA topoisomerase 4 subunit A,sequence conflict,	3	2256	0.00132979
STM14_0696	GJ0703GL003322	STY0642	2,3-dihydro-2,3-dihydroxybenzoate dehydrogenase(STY0642)	S. Typhi str. CT18		GO:0019290~siderophore biosynthetic process,		GO:0008667~2,3-dihydro-2,3-dihydroxybenzoate dehydrogenase activity,	IPR002347:Glucose/ribitol dehydrogenase,IPR003560:2,3-dihydro-2,3-dihydroxybenzoate dehydrogenase,IPR016040:NAD(P)-binding domain,IPR020904:Short-chain dehydrogenase/reductase, conserved site,	sty01053:Biosynthesis of siderophore group nonribosomal peptides,sty01110:Biosynthesis of secondary metabolites,sty01130:Biosynthesis of antibiotics,			Complete proteome,	Secondary metabolites biosynthesis, transport, and catabolism / General function prediction only		1	753	0.00132802
STM14_3463	GJ0703GL001102	STY2987	AraC family transcriptional regulator(sprB)	S. Typhi str. CT18	Signal transduction mechanisms / Transcription,	GO:0006355~regulation of transcription, DNA-templated,		GO:0003677~DNA binding,	IPR016032:Signal transduction response regulator, C-terminal effector,				Complete proteome,	Transcription		1	753	0.00132802
STM14_0922	GJ0703GL003142	STY0829	biotin synthesis protein BioC(STY0829)	S. Typhi str. CT18		GO:0009102~biotin biosynthetic process,		GO:0010340~carboxyl-O-methyltransferase activity,	IPR011814:Malonyl-CoA O-methyltransferase BioC,IPR013216:Methyltransferase type 11,	sty00780:Biotin metabolism,sty01100:Metabolic pathways,			Biotin biosynthesis,Complete proteome,Methyltransferase,S-adenosyl-L-methionine,Transferase,	Coenzyme metabolism		1	753	0.00132802
STM14_2301	GJ0703GL002063	STY2100	high-affinity zinc ABC transporter ATP-binding protein(STY2100)	S. Typhi str. CT18			GO:0043190~ATP-binding cassette (ABC) transporter complex,	GO:0005524~ATP binding,GO:0015633~zinc transporting ATPase activity,GO:0016887~ATPase activity,	IPR003439:ABC transporter-like,IPR003593:AAA+ ATPase domain,IPR017882:ABC transporter, zinc import, ATP-binding protein ZnuC,IPR027417:P-loop containing nucleoside triphosphate hydrolase,	sty02010:ABC transporters,		SM00382:AAA,	ATP-binding,Cell inner membrane,Cell membrane,Complete proteome,Hydrolase,Ion transport,Membrane,Nucleotide-binding,Transport,Zinc,Zinc transport,	Inorganic ion transport and metabolism	chain:Zinc import ATP-binding protein znuC,domain:ABC transporter,nucleotide phosphate-binding region:ATP,	1	753	0.00132802
STM14_0306	GJ0703GL003684	STY0282	hydroxyacylglutathione hydrolase(gloB)	S. Typhi str. CT18		GO:0019243~methylglyoxal catabolic process to D-lactate via S-lactoyl-glutathione,		GO:0004416~hydroxyacylglutathione hydrolase activity,GO:0046872~metal ion binding,	IPR001279:Beta-lactamase-like,IPR017782:Hydroxyacylglutathione hydrolase,	sty00620:Pyruvate metabolism,	PIRSF005457:hydroxyacylglutathione hydrolase,	SM00849:SM00849,	Complete proteome,Hydrolase,Metal-binding,Zinc,	General function prediction only	chain:Hydroxyacylglutathione hydrolase,helix,metal ion-binding site:Divalent metal cation 1,metal ion-binding site:Divalent metal cation 2,metal ion-binding site:Zinc 1,metal ion-binding site:Zinc 2,strand,turn,	1	753	0.00132802
STM14_1014	GJ0703GL003073	STY0897	deoxyribose operon repressor(STY0897)	S. Typhi str. CT18		GO:0006351~transcription, DNA-templated,	GO:0005622~intracellular,	GO:0003677~DNA binding,GO:0003700~transcription factor activity, sequence-specific DNA binding,	IPR001034:HTH DeoR N-terminal domain,IPR011991:Winged helix-turn-helix DNA-binding domain,IPR014036:DeoR C-terminal sensor domain,IPR018356:Transcription regulator, HTH DeoR-type, conserved site,			SM00420:HTH_DEOR,	Complete proteome,DNA-binding,Transcription,Transcription regulation,	Transcription / Carbohydrate transport and metabolism		1	756	0.00132275
STM14_1599	GJ0703GL002678	STY1796	hypothetical protein(STY1796)	S. Typhi str. CT18		GO:0000272~polysaccharide catabolic process,GO:0006032~chitin catabolic process,GO:0052777~diacetylchitobiose catabolic process,	GO:0005737~cytoplasm,	GO:0036311~chitin disaccharide deacetylase activity,GO:0046872~metal ion binding,	IPR002509:Polysaccharide deacetylase,IPR006879:Uncharacterised protein family UPF0249/HpnK,IPR011330:Glycoside hydrolase/deacetylase, beta/alpha-barrel,IPR022948:Uncharacterised protein family UPF0249,				Carbohydrate metabolism,Chitin degradation,Complete proteome,Cytoplasm,Hydrolase,Magnesium,Metal-binding,Polysaccharide degradation,	Function unknown	chain:UPF0249 protein chbG,	1	756	0.00132275
STM14_3669	GJ0703GL000913	STY3194	lipoprotein(STY3194)	S. Typhi str. CT18					IPR011055:Duplicated hybrid motif,IPR016047:Peptidase M23,IPR018392:Peptidoglycan-binding lysin domain,			SM00257:LysM,	Complete proteome,Lipoprotein,Signal,	Cell envelope biogenesis, outer membrane		1	756	0.00132275
STM14_1611	GJ0703GL002668	STY1784	outer membrane protein(STY1784)	S. Typhi str. CT18					IPR007433:Protein of unknown function DUF481,				Complete proteome,Signal,	Cell envelope biogenesis, outer membrane		1	756	0.00132275
STM14_0088	GJ0703GL003892	STY0084	carnitine transporter(STY0084)	S. Typhi str. CT18		GO:0009437~carnitine metabolic process,GO:1900751~4-(trimethylammonio)butanoate transport,	GO:0005886~plasma membrane,GO:0016021~integral component of membrane,	GO:0044667~(R)-carnitine:4-(trimethylammonio)butanoate antiporter activity,	IPR000060:BCCT transporter family,IPR018093:BCCT transporter, conserved site,IPR023449:BCCT transporter family, L-carnitine/gamma-butyrobetaine antiporter CaiT,				Antiport,Cell inner membrane,Cell membrane,Complete proteome,Membrane,Transmembrane,Transmembrane helix,Transport,	Cell envelope biogenesis, outer membrane	chain:L-carnitine/gamma-butyrobetaine antiporter,transmembrane region,	2	1515	0.00132013
STM14_0248	GJ0703GL003732	STY0230	deoxyguanosinetriphosphate triphosphohydrolase(STY0230)	S. Typhi str. CT18		GO:0006203~dGTP catabolic process,GO:0046039~GTP metabolic process,		GO:0000287~magnesium ion binding,GO:0008832~dGTPase activity,	IPR003607:HD/PDEase domain,IPR006261:Deoxyguanosinetriphosphate triphosphohydrolase,IPR006674:HD domain,IPR020779:Deoxyguanosinetriphosphate triphosphohydrolase, proteobacteria,IPR023293:Deoxyguanosinetriphosphate triphosphohydrolase, central domain,IPR026875:Phosphohydrolase-associated domain,IPR027432:Deoxyguanosinetriphosphate triphosphohydrolase, C-terminal domain,	sty00230:Purine metabolism,		SM00471:HDc,	Complete proteome,Hydrolase,Magnesium,	Nucleotide transport and metabolism	chain:Deoxyguanosinetriphosphate triphosphohydrolase,	2	1515	0.00132013
STM14_5167	GJ0703GL004361	STY4494	AraC family transcriptional regulator(STY4494)	S. Typhi str. CT18		GO:0006351~transcription, DNA-templated,		GO:0003700~transcription factor activity, sequence-specific DNA binding,GO:0043565~sequence-specific DNA binding,	IPR009057:Homeodomain-like,IPR018060:DNA binding HTH domain, AraC-type,IPR018062:HTH domain AraC-type, conserved site,IPR020449:Transcription regulator HTH, AraC- type,			SM00342:HTH_ARAC,	Complete proteome,DNA-binding,Transcription,Transcription regulation,	Transcription		1	759	0.00131752
STM14_0395	GJ0703GL003601	STY0372	fimbrial chaperone protein(stbB)	S. Typhi str. CT18	Cell motility,	GO:0043711~pilus organization,GO:0061077~chaperone-mediated protein folding,GO:0071555~cell wall organization,	GO:0030288~outer membrane-bounded periplasmic space,		IPR001829:Pili assembly chaperone, bacterial,IPR008962:PapD-like,IPR016147:Pili assembly chaperone, N-terminal, bacterial,IPR016148:Pili assembly chaperone, C-terminal domain,IPR018046:Pili assembly chaperone, conserved site,				Chaperone,Complete proteome,	Cell motility and secretion / Intracellular trafficking and secretion	signal peptide,	1	759	0.00131752
STM14_2984	GJ0703GL001476	STY2665	sulfate transport protein CysZ(STY2665)	S. Typhi str. CT18		GO:0000103~sulfate assimilation,GO:0008652~cellular amino acid biosynthetic process,GO:0019344~cysteine biosynthetic process,	GO:0005887~integral component of plasma membrane,	GO:0015116~sulfate transmembrane transporter activity,	IPR022985:CysZ, gammaproteobacteria,				Amino-acid biosynthesis,Cell inner membrane,Cell membrane,Complete proteome,Cysteine biosynthesis,Membrane,Sulfate transport,Transmembrane,Transmembrane helix,Transport,	Amino acid transport and metabolism	chain:Protein cysZ,topological domain:Cytoplasmic,topological domain:Periplasmic,transmembrane region,	1	759	0.00131752
STM14_3894	GJ0703GL000697	STY3395	aerotaxis receptor protein(STY3395)	S. Typhi str. CT18		GO:0006935~chemotaxis,	GO:0016021~integral component of membrane,	GO:0004871~signal transducer activity,	IPR000014:PAS domain,IPR001610:PAC motif,IPR003660:HAMP linker domain,IPR004089:Methyl-accepting chemotaxis protein (MCP) signalling domain,IPR004090:Chemotaxis methyl-accepting receptor,IPR013655:PAS fold-3,	sty02020:Two-component system,sty02030:Bacterial chemotaxis,		SM00086:PAC,SM00283:MA,	Complete proteome,Receptor,	Cell motility and secretion / Signal transduction mechanisms		2	1518	0.00131752
STM14_3521	GJ0703GL001049	STY3044	DeoR family transcriptional regulator(STY3044)	S. Typhi str. CT18	Transcription / Carbohydrate transport and metabolism,	GO:0006351~transcription, DNA-templated,	GO:0005622~intracellular,	GO:0003677~DNA binding,GO:0003700~transcription factor activity, sequence-specific DNA binding,	IPR001034:HTH DeoR N-terminal domain,IPR011991:Winged helix-turn-helix DNA-binding domain,IPR014036:DeoR C-terminal sensor domain,IPR018356:Transcription regulator, HTH DeoR-type, conserved site,			SM00420:HTH_DEOR,	Complete proteome,DNA-binding,Transcription,Transcription regulation,	Transcription / Carbohydrate transport and metabolism		1	762	0.00131234
STM14_3142	GJ0703GL001335	STY2810	hypothetical protein(STY2810)	S. Typhi str. CT18					IPR025262:Quorum-sensing regulator protein G,				Complete proteome,		signal peptide,	1	762	0.00131234
STM14_5366	GJ0703GL004182	STY4809	tRNA hydroxylase(miaE)	S. Typhi str. CT18				GO:0045301~tRNA-(2-methylthio-N-6-(cis-hydroxy)isopentenyl adenosine)-hydroxylase activity,	IPR009078:Ferritin-like superfamily,IPR010386:tRNA-hydroxylase MiaE,IPR012347:Ferritin-related,		PIRSF020736:tRNA-(MS[2]IO[6]A)-hydroxylase MiaE,		Complete proteome,	Nucleotide transport and metabolism / Translation, ribosomal structure and biogenesis	chain:tRNA-(ms[2]io[6]A)-hydroxylase,	1	762	0.00131234
STM14_0124	GJ0703GL003861	STY0122	DedA family integral membrane protein(STY0122)	S. Typhi str. CT18	Function unknown,		GO:0016021~integral component of membrane,						Complete proteome,Membrane,Transmembrane,Transmembrane helix,	Function unknown		1	765	0.00130719
STM14_0205	GJ0703GL003777	STY0195	ABC transporter permease(STY0195)	S. Typhi str. CT18		GO:0006810~transport,	GO:0005886~plasma membrane,GO:0016021~integral component of membrane,		IPR000412:ABC-2,IPR013525:ABC-2 type transporter,		PIRSF006648:ABC-type transport system, permease component, DrrB type,		Cell membrane,Complete proteome,Membrane,Transmembrane,Transmembrane helix,Transport,	Carbohydrate transport and metabolism / Cell envelope biogenesis, outer membrane		1	768	0.00130208
STM14_0813	GJ0703GL003227	STY0734	esterase/lipase YbfF(ybfF)	S. Typhi str. CT18				GO:0016787~hydrolase activity,	IPR000073:Alpha/beta hydrolase fold-1,				Complete proteome,Hydrolase,	General function prediction only		1	768	0.00130208
STM14_0304	GJ0703GL003686	STY0280	methyltransferase(yafE)	S. Typhi str. CT18				GO:0008168~methyltransferase activity,	IPR013216:Methyltransferase type 11,				Complete proteome,Methyltransferase,Transferase,			1	768	0.00130208
STM14_5483	GJ0703GL004008	STY4915	DNase(STY4915)	S. Typhi str. CT18				GO:0016888~endodeoxyribonuclease activity, producing 5'-phosphomonoesters,	IPR001130:TatD family,IPR018228:Deoxyribonuclease, TatD-related, conserved site,		PIRSF005902:Mg-dependent DNase, TatD type,		Complete proteome,Hydrolase,	DNA replication, recombination, and repair		1	771	0.00129702
STM14_0907	GJ0703GL003157	STY0814	molybdenum ABC transporter substrate-binding protein ModA(STY0814)	S. Typhi str. CT18			GO:0030288~outer membrane-bounded periplasmic space,	GO:0015412~molybdate transmembrane-transporting ATPase activity,	IPR005950:Molybdenum ABC transporter, periplasmic binding protein,	sty02010:ABC transporters,	PIRSF004846:molybdate-binding periplasmic protein,		Complete proteome,Signal,	Inorganic ion transport and metabolism	signal peptide,	1	771	0.00129702
STM14_5082	GJ0703GL004434	STY4424	maltose transport system permease MalF(STY4424)	S. Typhi str. CT18		GO:0008643~carbohydrate transport,	GO:0005886~plasma membrane,GO:0016021~integral component of membrane,		IPR000515:Binding-protein-dependent transport systems inner membrane component,	sty02010:ABC transporters,			Cell inner membrane,Cell membrane,Complete proteome,Membrane,Sugar transport,Transmembrane,Transmembrane helix,Transport,	Carbohydrate transport and metabolism	chain:Maltose transport system permease protein malF,domain:ABC transmembrane type-1,sequence conflict,topological domain:Cytoplasmic,topological domain:Periplasmic,transmembrane region,	2	1542	0.00129702
STM14_1120	GJ0703GL002966	STY0992	hypothetical protein(STY0992)	S. Typhi str. CT18			GO:0016021~integral component of membrane,		IPR003848:Domain of unknown function DUF218,IPR014729:Rossmann-like alpha/beta/alpha sandwich fold,				Complete proteome,Membrane,Transmembrane,Transmembrane helix,	Function unknown	signal peptide,	1	774	0.00129199
STM14_5485	GJ0703GL004006	STY4917	hypothetical protein(STY4917)	S. Typhi str. CT18					IPR016905:Glycyl radical enzyme, HI0521, predicted,		PIRSF028991:glycyl radical enzyme, HI0521 type,		Complete proteome,			2	1548	0.00129199
STM14_2086	GJ0703GL002241	STY1328	anthranilate synthase component I(STY1328)	S. Typhi str. CT18		GO:0000162~tryptophan biosynthetic process,GO:0008652~cellular amino acid biosynthetic process,		GO:0004049~anthranilate synthase activity,GO:0046872~metal ion binding,	IPR005257:Anthranilate synthase component I, TrpE-like, bacterial,IPR005801:ADC synthase,IPR006805:Anthranilate synthase component I, N-terminal,IPR015890:Chorismate binding, C-terminal,IPR019999:Anthranilate synthase component I,	sty00400:Phenylalanine, tyrosine and tryptophan biosynthesis,sty01100:Metabolic pathways,sty01110:Biosynthesis of secondary metabolites,sty01230:Biosynthesis of amino acids,	PIRSF001373:anthranilate synthase component I,		Amino-acid biosynthesis,Aromatic amino acid biosynthesis,Complete proteome,Lyase,Magnesium,Metal-binding,Tryptophan biosynthesis,	Amino acid transport and metabolism / Coenzyme metabolism	chain:Anthranilate synthase component 1,helix,mutagenesis site,sequence conflict,strand,turn,	2	1560	0.00128205
STM14_3863	GJ0703GL000725	STY3367	dioxygenase(STY3367)	S. Typhi str. CT18		GO:0006725~cellular aromatic compound metabolic process,		GO:0008198~ferrous iron binding,GO:0008270~zinc ion binding,GO:0016701~oxidoreductase activity, acting on single donors with incorporation of molecular oxygen,	IPR004183:Extradiol ring-cleavage dioxygenase, class III enzyme, subunit B,IPR014436:Extradiol aromatic ring-opening dioxygenase, DODA type,		PIRSF006157:extradiol aromatic ring-opening dioxygenase, DODA type,		Complete proteome,Metal-binding,Zinc,	Function unknown		1	786	0.00127226
STM14_2053	GJ0703GL002266	STY1352	enoyl-[acyl-carrier-protein] reductase(STY1352)	S. Typhi str. CT18	acyl-carrier-protein,	GO:0006633~fatty acid biosynthetic process,		GO:0004318~enoyl-[acyl-carrier-protein] reductase (NADH) activity,	IPR002347:Glucose/ribitol dehydrogenase,IPR014358:Enoyl-[acyl-carrier-protein] reductase (NADH),IPR016040:NAD(P)-binding domain,	sty00061:Fatty acid biosynthesis,sty00780:Biotin metabolism,sty01100:Metabolic pathways,sty01212:Fatty acid metabolism,	PIRSF000094:enoyl-[acyl-carrier-protein] reductase (NADH),		Complete proteome,Fatty acid biosynthesis,Fatty acid metabolism,Lipid biosynthesis,Lipid metabolism,NAD,Oxidoreductase,		active site:Proton acceptor,chain:Enoyl-[acyl-carrier-protein] reductase [NADH],mutagenesis site,nucleotide phosphate-binding region:NAD,	1	786	0.00127226
STM14_5466	GJ0703GL004068	STY4903	ferric iron reductase protein(STY4903)	S. Typhi str. CT18				GO:0051537~2 iron, 2 sulfur cluster binding,	IPR008090:Ferric iron reductase,IPR022770:FhuF/siderophore biosynthesis protein, C-terminal,IPR024726:Ferric iron reductase, C-terminal,				Complete proteome,	General function prediction only		1	786	0.00127226
STM14_0400	GJ0703GL003597	STY0376	hypothetical protein(STY0376)	S. Typhi str. CT18			GO:0016021~integral component of membrane,		IPR001633:Diguanylate phosphodiesterase, EAL domain,IPR024744:Putative cyclic diguanylate phosphodiesterase, CSS motif-containing domain,			SM00052:DUF2,	Complete proteome,Membrane,Transmembrane,Transmembrane helix,	Signal transduction mechanisms		2	1572	0.00127226
STM14_0847	GJ0703GL003208	STY0771	endonuclease VIII(STY0771)	S. Typhi str. CT18		GO:0006284~base-excision repair,GO:0006289~nucleotide-excision repair,		GO:0000703~oxidized pyrimidine nucleobase lesion DNA N-glycosylase activity,GO:0003684~damaged DNA binding,GO:0008270~zinc ion binding,	IPR000214:Zinc finger, DNA glycosylase/AP lyase-type,IPR010663:Zinc finger, DNA glycosylase/AP lyase/isoleucyl tRNA synthetase,IPR010979:Ribosomal protein S13-like, H2TH,IPR012319:DNA glycosylase/AP lyase, catalytic domain,IPR015886:DNA glycosylase/AP lyase, H2TH DNA-binding,IPR015887:DNA glycosylase/AP lyase, zinc finger domain, DNA-binding site,IPR023713:Endonuclease VIII,	sty03410:Base excision repair,		SM00898:SM00898,SM01232:SM01232,	Complete proteome,DNA damage,DNA repair,DNA-binding,Glycosidase,Hydrolase,Lyase,Metal-binding,Multifunctional enzyme,Zinc,Zinc-finger,	DNA replication, recombination, and repair	active site:Proton donor,active site:Proton donor; for beta-elimination activity,active site:Proton donor; for delta-elimination activity,active site:Schiff-base intermediate with DNA,binding site:DNA,chain:Endonuclease 8,chain:Endonuclease VIII,zinc finger region:FPG-type,	1	789	0.00126743
STM14_972	GJ0703GL003099	STY0875	hypothetical protein(ybiP)	S. Typhi str. CT18	General function prediction only,	GO:0008152~metabolic process,	GO:0016021~integral component of membrane,	GO:0008484~sulfuric ester hydrolase activity,GO:0016740~transferase activity,	IPR000917:Sulfatase,IPR017849:Alkaline phosphatase-like, alpha/beta/alpha,IPR017850:Alkaline-phosphatase-like, core domain,				Complete proteome,Membrane,Transferase,Transmembrane,Transmembrane helix,	General function prediction only		2	1578	0.00126743
STM14_0584	GJ0703GL003428	STY0542	hypothetical protein(STY0542)	S. Typhi str. CT18					IPR002816:Pheromone shutdown, TraB,				Complete proteome,	Function unknown		1	792	0.00126263
STM14_0504	GJ0703GL003503	STY0465	2-aminoethylphosphonate transport system permease PhnV(phnV)	S. Typhi str. CT18		GO:0006810~transport,	GO:0005886~plasma membrane,GO:0016021~integral component of membrane,		IPR000515:Binding-protein-dependent transport systems inner membrane component,IPR017661:2-aminoethylphosphonate ABC transport system, membrane component PhnV,	sty02010:ABC transporters,			Cell inner membrane,Cell membrane,Complete proteome,Membrane,Transmembrane,Transmembrane helix,Transport,	Amino acid transport and metabolism	chain:Putative 2-aminoethylphosphonate transport system permease protein phnV,domain:ABC transmembrane type-1,signal peptide,transmembrane region,	1	795	0.00125786
STM14_1375	GJ0703GL002800	STY1241	DNAse(STY1241)	S. Typhi str. CT18				GO:0016888~endodeoxyribonuclease activity, producing 5'-phosphomonoesters,	IPR001130:TatD family,IPR015991:Uncharacterised deoxyribonuclease TatD-type,IPR018228:Deoxyribonuclease, TatD-related, conserved site,		PIRSF005902:Mg-dependent DNase, TatD type,		Complete proteome,Hydrolase,	DNA replication, recombination, and repair		1	795	0.00125786
STM14_1096	GJ0703GL002988	STY0968	pyruvate formate-lyase 1 activating enzyme(STY0968)	S. Typhi str. CT18			GO:0005737~cytoplasm,	GO:0016829~lyase activity,GO:0043365~[formate-C-acetyltransferase]-activating enzyme activity,GO:0046872~metal ion binding,GO:0051539~4 iron, 4 sulfur cluster binding,	IPR001989:Radical-activating enzyme, conserved site,IPR007197:Radical SAM,IPR012838:Pyruvate formate-lyase activating enzyme,IPR016431:Pyruvate-formate lyase-activating enzyme, predicted,		PIRSF004869:pyruvate-formate lyase-activating enzyme,		4Fe-4S,Complete proteome,Cytoplasm,Iron,Iron-sulfur,Lyase,Metal-binding,Oxidoreductase,Pyruvate,S-adenosyl-L-methionine,	Posttranslational modification, protein turnover, chaperones		1	795	0.00125786
STM14_4896	GJ0703GL004578	STY3798	sugar kinase(STY3798)	S. Typhi str. CT18		GO:0005975~carbohydrate metabolic process,GO:0009372~quorum sensing,	GO:0005737~cytoplasm,	GO:0016773~phosphotransferase activity, alcohol group as acceptor,GO:0071518~autoinducer-2 kinase activity,	IPR018484:Carbohydrate kinase, FGGY, N-terminal,IPR018485:Carbohydrate kinase, FGGY, C-terminal,		PIRSF000538:keto-sugar kinase,		Complete proteome,Cytoplasm,Kinase,Transferase,	Carbohydrate transport and metabolism	chain:Autoinducer 2 kinase lsrK,	2	1590	0.00125786
STM14_4232	GJ0703GL000405	STY4282	maltodextrin phosphorylase(STY4282)	S. Typhi str. CT18		GO:0005975~carbohydrate metabolic process,		GO:0008184~glycogen phosphorylase activity,GO:0030170~pyridoxal phosphate binding,	IPR000811:Glycosyl transferase, family 35,IPR011833:Glycogen/starch/alpha-glucan phosphorylase,	sty00500:Starch and sucrose metabolism,sty01100:Metabolic pathways,sty01110:Biosynthesis of secondary metabolites,sty04931:Insulin resistance,	PIRSF000460:glucan phosphorylase,		Carbohydrate metabolism,Complete proteome,Glycosyltransferase,Pyridoxal phosphate,Transferase,	Carbohydrate transport and metabolism		3	2391	0.00125471
STM14_2372	GJ0703GL002005	STY2162	cystine-binding periplasmic protein(fliY)	S. Typhi str. CT18			GO:0016020~membrane,	GO:0004970~ionotropic glutamate receptor activity,	IPR001320:Ionotropic glutamate receptor,IPR001638:Extracellular solute-binding protein, family 3,IPR018313:Extracellular solute-binding protein, family 3, conserved site,	sty02010:ABC transporters,		SM00062:PBPb,SM00079:PBPe,	Complete proteome,Signal,	Amino acid transport and metabolism / Signal transduction mechanisms	signal peptide,	1	798	0.00125313
STM14_0303	GJ0703GL003687	STY0279	hypothetical protein(STY0279)	S. Typhi str. CT18			GO:0005737~cytoplasm,		IPR005135:Endonuclease/exonuclease/phosphatase,IPR022958:Uncharacterised protein family UPF0294,				Complete proteome,Cytoplasm,	Function unknown	chain:UPF0294 protein yafD,	1	798	0.00125313
STM14_3559	GJ0703GL001004	STY3083	nucleoside triphosphate pyrophosphohydrolase(STY3083)	S. Typhi str. CT18				GO:0016787~hydrolase activity,	IPR004518:NTP pyrophosphohydrolase MazG, putative catalytic core,IPR011551:NTP pyrophosphohydrolase MazG, bacterial,	sty00230:Purine metabolism,sty00240:Pyrimidine metabolism,sty01100:Metabolic pathways,			Complete proteome,Hydrolase,	General function prediction only		1	798	0.00125313
STM14_2647	GJ0703GL001794	STY2375	phosphomethylpyrimidine kinase(thiD)	S. Typhi str. CT18		GO:0009228~thiamine biosynthetic process,		GO:0005524~ATP binding,GO:0008972~phosphomethylpyrimidine kinase activity,	IPR004399:Phosphomethylpyrimidine kinase type-2,IPR013749:Phosphomethylpyrimidine kinase type-1,	sty00730:Thiamine metabolism,sty01100:Metabolic pathways,			ATP-binding,Complete proteome,Kinase,Nucleotide-binding,Transferase,	Coenzyme metabolism	chain:Phosphomethylpyrimidine kinase,helix,sequence conflict,strand,turn,	1	798	0.00125313
STM14_3602	GJ0703GL000962	STY3127	tRNA threonylcarbamoyladenosine dehydratase(STY3127)	S. Typhi str. CT18	Coenzyme metabolism,		GO:0016021~integral component of membrane,	GO:0008641~small protein activating enzyme activity,	IPR000594:UBA/THIF-type NAD/FAD binding fold,IPR016040:NAD(P)-binding domain,				Complete proteome,Membrane,Transmembrane,Transmembrane helix,	Coenzyme metabolism		1	804	0.00124378
STM14_2090	GJ0703GL002237	STY1324	tryptophan synthase subunit alpha(STY1324)	S. Typhi str. CT18		GO:0008652~cellular amino acid biosynthetic process,		GO:0004834~tryptophan synthase activity,	IPR002028:Tryptophan synthase, alpha chain,IPR011060:Ribulose-phosphate binding barrel,IPR013785:Aldolase-type TIM barrel,IPR018204:Tryptophan synthase, alpha chain, active site,	sty00260:Glycine, serine and threonine metabolism,sty00400:Phenylalanine, tyrosine and tryptophan biosynthesis,sty01100:Metabolic pathways,sty01110:Biosynthesis of secondary metabolites,sty01230:Biosynthesis of amino acids,			Amino-acid biosynthesis,Aromatic amino acid biosynthesis,Complete proteome,Lyase,Tryptophan biosynthesis,	Amino acid transport and metabolism	active site:Proton acceptor,chain:Tryptophan synthase alpha chain,helix,strand,turn,	1	804	0.00124378
STM14_0511	GJ0703GL003497	STY0471	phosphonoacetaldehyde phosphonohydrolase(phnX)	S. Typhi str. CT18	General function prediction only,	GO:0019700~organic phosphonate catabolic process,		GO:0000287~magnesium ion binding,GO:0050194~phosphonoacetaldehyde hydrolase activity,	IPR006323:Phosphonoacetaldehyde hydrolase,IPR006439:HAD-superfamily hydrolase, subfamily IA, variant 1,IPR023198:Phosphoglycolate phosphatase, domain 2,IPR023214:HAD-like domain,	sty00440:Phosphonate and phosphinate metabolism,sty01100:Metabolic pathways,sty01120:Microbial metabolism in diverse environments,			Complete proteome,Hydrolase,Magnesium,Metal-binding,Schiff base,	General function prediction only	active site:Nucleophile,active site:Schiff-base intermediate with substrate,chain:Phosphonoacetaldehyde hydrolase,metal ion-binding site:Magnesium,metal ion-binding site:Magnesium; via carbonyl oxygen,mutagenesis site,sequence conflict,	1	807	0.00123916
STM14_2528	GJ0703GL001912	STY2244	propanediol utilization protein PduB(pduB)	S. Typhi str. CT18	Amino acid transport and metabolism,	GO:0009605~response to external stimulus,		GO:0005198~structural molecule activity,	IPR000249:Microcompartment protein, bacteria,IPR009193:Polyhedral organelle shell protein, EutL/PduB type,		PIRSF012290:polyhedral organelle shell protein, EutL/PduB type,	SM00877:SM00877,	Complete proteome,	Amino acid transport and metabolism		1	810	0.00123457
STM14_2916	GJ0703GL001579	STY2599	tRNA pseudouridine synthase A(STY2599)	S. Typhi str. CT18	Translation, ribosomal structure and biogenesis,	GO:0031119~tRNA pseudouridine synthesis,		GO:0003723~RNA binding,GO:0009982~pseudouridine synthase activity,	IPR001406:Pseudouridine synthase I, TruA,IPR020094:Pseudouridine synthase I, TruA, N-terminal,IPR020095:Pseudouridine synthase I, TruA, C-terminal,IPR020097:Pseudouridine synthase I, TruA, alpha/beta domain,IPR020103:Pseudouridine synthase, catalytic domain,		PIRSF001430:tRNA-pseudouridine synthase A, prokaryotic type,		Complete proteome,Isomerase,tRNA processing,	Translation, ribosomal structure and biogenesis	active site:Nucleophile,binding site:Substrate,chain:tRNA pseudouridine synthase A,	1	810	0.00123457
STM14_3237	GJ0703GL001309	STY2834	L-aspartate oxidase(STY2834)	S. Typhi str. CT18		GO:0009435~NAD biosynthetic process,	GO:0005737~cytoplasm,	GO:0008734~L-aspartate oxidase activity,GO:0044318~L-aspartate:fumarate oxidoreductase activity,	IPR003953:FAD binding domain,IPR005288:L-aspartate oxidase,IPR015939:Fumarate reductase/succinate dehydrogenase flavoprotein-like, C-terminal,IPR023753:Pyridine nucleotide-disulphide oxidoreductase, FAD/NAD(P)-binding domain,IPR027477:Succinate dehydrogenase/fumarate reductase flavoprotein, catalytic domain,	sty00250:Alanine, aspartate and glutamate metabolism,sty00760:Nicotinate and nicotinamide metabolism,sty01100:Metabolic pathways,			Complete proteome,Cytoplasm,FAD,Flavoprotein,Oxidoreductase,Pyridine nucleotide biosynthesis,		chain:L-aspartate oxidase,nucleotide phosphate-binding region:FAD,	2	1620	0.00123457
STM14_4157	GJ0703GL000465	STY4345	FkbB-type peptidyl-prolyl cis-trans isomerase(fkpA)	S. Typhi str. CT18	Posttranslational modification, protein turnover, chaperones,	GO:0006457~protein folding,		GO:0003755~peptidyl-prolyl cis-trans isomerase activity,	IPR000774:Peptidyl-prolyl cis-trans isomerase, FKBP-type, N-terminal,IPR001179:Peptidyl-prolyl cis-trans isomerase, FKBP-type, domain,IPR023566:Peptidyl-prolyl cis-trans isomerase, FKBP-type,				Complete proteome,Isomerase,Rotamase,Signal,	Posttranslational modification, protein turnover, chaperones	signal peptide,	1	816	0.00122549
STM14_0541	GJ0703GL003469	STY0499	thiamin pyrimidine pyrophosphate hydrolase(STY0499)	S. Typhi str. CT18				GO:0000287~magnesium ion binding,GO:0016791~phosphatase activity,GO:0016818~hydrolase activity, acting on acid anhydrides, in phosphorus-containing anhydrides,	IPR000150:Cof protein,IPR006379:HAD-superfamily hydrolase, subfamily IIB,IPR023214:HAD-like domain,IPR023938:HMP-PP phosphatase,				Complete proteome,Hydrolase,Magnesium,Metal-binding,	General function prediction only	chain:HMP-PP phosphatase,	1	816	0.00122549
STM14_1515	GJ0703GL002743	STY1865	substrate-binding transport protein(STY1865)	S. Typhi str. CT18	Amino acid transport and metabolism,	GO:0055085~transmembrane transport,	GO:0043190~ATP-binding cassette (ABC) transporter complex,		IPR000914:Bacterial extracellular solute-binding protein, family 5,		PIRSF002741:peptide binding protein, MppA type,		Complete proteome,Signal,	Amino acid transport and metabolism		2	1632	0.00122549
STM14_0075	GJ0703GL003903	STY0073	4-hydroxy-tetrahydrodipicolinate reductase(STY0073)	S. Typhi str. CT18		GO:0009089~lysine biosynthetic process via diaminopimelate,GO:0019877~diaminopimelate biosynthetic process,	GO:0005737~cytoplasm,	GO:0008839~4-hydroxy-tetrahydrodipicolinate reductase,GO:0016726~oxidoreductase activity, acting on CH or CH2 groups, NAD or NADP as acceptor,GO:0050661~NADP binding,GO:0051287~NAD binding,	IPR000846:Dihydrodipicolinate reductase, N-terminal,IPR016040:NAD(P)-binding domain,IPR022663:Dihydrodipicolinate reductase, C-terminal,IPR022664:Dihydrodipicolinate reductase, conserved site,IPR023940:Dihydrodipicolinate reductase, bacterial,	sty00261:Monobactam biosynthesis,sty00300:Lysine biosynthesis,sty01100:Metabolic pathways,sty01110:Biosynthesis of secondary metabolites,sty01120:Microbial metabolism in diverse environments,sty01130:Biosynthesis of antibiotics,sty01230:Biosynthesis of amino acids,	PIRSF000161:dihydrodipicolinate reductase,		Amino-acid biosynthesis,Complete proteome,Cytoplasm,Diaminopimelate biosynthesis,Lysine biosynthesis,NAD,NADP,Oxidoreductase,	Amino acid transport and metabolism	chain:Dihydrodipicolinate reductase,	1	819	0.001221
STM14_4459	GJ0703GL000150	STY4096	serine acetyltransferase(cysE)	S. Typhi str. CT18		GO:0006535~cysteine biosynthetic process from serine,	GO:0005737~cytoplasm,	GO:0009001~serine O-acetyltransferase activity,	IPR001451:Bacterial transferase hexapeptide repeat,IPR005881:Serine O-acetyltransferase,IPR010493:Serine acetyltransferase, N-terminal,IPR011004:Trimeric LpxA-like,IPR018357:Hexapeptide transferase, conserved site,	sty00270:Cysteine and methionine metabolism,sty00920:Sulfur metabolism,sty01100:Metabolic pathways,sty01110:Biosynthesis of secondary metabolites,sty01120:Microbial metabolism in diverse environments,sty01200:Carbon metabolism,sty01230:Biosynthesis of amino acids,		SM00971:SM00971,	Acyltransferase,Complete proteome,Transferase,	Amino acid transport and metabolism	chain:Serine acetyltransferase,	1	819	0.001221
STM14_4104	GJ0703GL000515	STY4396	shikimate dehydrogenase(aroE)	S. Typhi str. CT18		GO:0008652~cellular amino acid biosynthetic process,GO:0009073~aromatic amino acid family biosynthetic process,GO:0009423~chorismate biosynthetic process,GO:0019632~shikimate metabolic process,		GO:0004764~shikimate 3-dehydrogenase (NADP+) activity,GO:0050661~NADP binding,	IPR006151:Quinate/shikimate 5-dehydrogenase/glutamyl-tRNA reductase,IPR011342:Shikimate dehydrogenase,IPR013708:Shikimate dehydrogenase substrate binding, N-terminal,IPR016040:NAD(P)-binding domain,IPR022893:Shikimate, quinate/shikimate dehydrogenase,	sty00400:Phenylalanine, tyrosine and tryptophan biosynthesis,sty01100:Metabolic pathways,sty01110:Biosynthesis of secondary metabolites,sty01130:Biosynthesis of antibiotics,sty01230:Biosynthesis of amino acids,			Amino-acid biosynthesis,Aromatic amino acid biosynthesis,Complete proteome,NADP,Oxidoreductase,	Amino acid transport and metabolism	active site:Proton acceptor,binding site:NAD,binding site:NAD; via amide nitrogen,binding site:Substrate,chain:Quinate/shikimate dehydrogenase,chain:Shikimate dehydrogenase,nucleotide phosphate-binding region:NAD,nucleotide phosphate-binding region:NADP,	1	819	0.001221
STM14_0253	GJ0703GL003726	STY0236	2,3,4,5-tetrahydropyridine-2,6-dicarboxylate N-succinyltransferase(STY0236)	S. Typhi str. CT18		GO:0009089~lysine biosynthetic process via diaminopimelate,GO:0019877~diaminopimelate biosynthetic process,	GO:0005737~cytoplasm,	GO:0008666~2,3,4,5-tetrahydropyridine-2,6-dicarboxylate N-succinyltransferase activity,	IPR001451:Bacterial transferase hexapeptide repeat,IPR005664:Tetrahydrodipicolinate N-succinyltransferase, transferase hexapeptide repeat family,IPR011004:Trimeric LpxA-like,IPR018357:Hexapeptide transferase, conserved site,IPR023180:Tetrahydrodipicolinate-N-succinyltransferase, chain A, domain 1,	sty00300:Lysine biosynthesis,sty01100:Metabolic pathways,sty01120:Microbial metabolism in diverse environments,sty01230:Biosynthesis of amino acids,			Acyltransferase,Amino-acid biosynthesis,Complete proteome,Cytoplasm,Diaminopimelate biosynthesis,Lysine biosynthesis,Repeat,Transferase,	Amino acid transport and metabolism	binding site:Substrate,chain:2,3,4,5-tetrahydropyridine-2,6- dicarboxylate N-succinyltransferase,	1	822	0.00121655
STM14_2932	GJ0703GL001566	STY2615	penicillin-insensitive murein endopeptidase(STY2615)	S. Typhi str. CT18	Cell envelope biogenesis, outer membrane,	GO:0000270~peptidoglycan metabolic process,	GO:0030288~outer membrane-bounded periplasmic space,	GO:0004222~metalloendopeptidase activity,GO:0004252~serine-type endopeptidase activity,GO:0046872~metal ion binding,	IPR005073:Peptidase M74, penicillin-insensitive murein endopeptidase,IPR009045:Hedgehog signalling/DD-peptidase zinc-binding domain,		PIRSF018455:penicillin-insensitive murein endopeptidase,		Complete proteome,Disulfide bond,Hydrolase,Metal-binding,Metalloprotease,Periplasm,Protease,Signal,Zinc,	Cell envelope biogenesis, outer membrane	chain:Penicillin-insensitive murein endopeptidase,disulfide bond,metal ion-binding site:Zinc 1,metal ion-binding site:Zinc 2,signal peptide,	1	822	0.00121655
STM14_2839	GJ0703GL001651	STY2531	4-amino-4-deoxy-L-arabinose lipid A transferase(STY2531)	S. Typhi str. CT18	Cell envelope biogenesis, outer membrane,	GO:0006493~protein O-linked glycosylation,GO:0009103~lipopolysaccharide biosynthetic process,GO:0009245~lipid A biosynthetic process,	GO:0005886~plasma membrane,GO:0016021~integral component of membrane,	GO:0000030~mannosyltransferase activity,GO:0016763~transferase activity, transferring pentosyl groups,	IPR003342:Glycosyl transferase, family 39,IPR022839:Undecaprenyl phosphate-alpha-4-amino-4-deoxy-L-arabinose arabinosyl transferase,	sty01503:Cationic antimicrobial peptide (CAMP) resistance,			Cell inner membrane,Cell membrane,Complete proteome,Glycosyltransferase,Lipid A biosynthesis,Lipid biosynthesis,Lipid metabolism,Lipopolysaccharide biosynthesis,Membrane,Transferase,Transmembrane,Transmembrane helix,	Cell envelope biogenesis, outer membrane	chain:Undecaprenyl phosphate-alpha-4-amino-4- deoxy-L-arabinose arabinosyl transferase,sequence conflict,transmembrane region,	2	1644	0.00121655
STM14_4637	GJ0703GL004810	STY3938	membrane protein insertase(STY3938)	S. Typhi str. CT18		GO:0015031~protein transport,GO:0051205~protein insertion into membrane,	GO:0005886~plasma membrane,GO:0016021~integral component of membrane,		IPR001708:Membrane insertase OXA1/ALB3/YidC,IPR019998:Membrane insertase YidC,	sty03060:Protein export,sty03070:Bacterial secretion system,			Cell inner membrane,Cell membrane,Chaperone,Complete proteome,Membrane,Protein transport,Transmembrane,Transmembrane helix,Transport,	Intracellular trafficking and secretion	chain:Inner membrane protein oxaA,transmembrane region,	2	1644	0.00121655
STM14_1052	GJ0703GL003037	STY0933	prismane protein(STY0933)	S. Typhi str. CT18			GO:0005737~cytoplasm,	GO:0046872~metal ion binding,GO:0050418~hydroxylamine reductase activity,GO:0051537~2 iron, 2 sulfur cluster binding,	IPR004137:Hydroxylamine reductase/Ni-containing CO dehydrogenase,IPR010048:Hydroxylamine reductase,IPR011254:Prismane-like,IPR016099:Prismane-like, alpha/beta-sandwich,IPR016100:Prismane, alpha-bundle,	sty00910:Nitrogen metabolism,	PIRSF000076:hydroxylamine reductase,		2Fe-2S,Complete proteome,Cytoplasm,Iron,Iron-sulfur,Metal-binding,Oxidoreductase,		chain:Hydroxylamine reductase,metal ion-binding site:Iron-oxo-sulfur (4Fe-2O-2S),metal ion-binding site:Iron-oxo-sulfur (4Fe-2O-2S); via tele nitrogen,metal ion-binding site:Iron-sulfur (2Fe-2S),	2	1650	0.00121212
STM14_1046	GJ0703GL003043	STY0927	N-acetylmuramoyl-L-alanine amidase(STY0927)	S. Typhi str. CT18	Cell envelope biogenesis, outer membrane,	GO:0009253~peptidoglycan catabolic process,		GO:0008745~N-acetylmuramoyl-L-alanine amidase activity,	IPR002477:Peptidoglycan binding-like,IPR002502:N-acetylmuramoyl-L-alanine amidase domain,			SM00644:Ami_2,	Complete proteome,Signal,	Defense mechanisms		1	828	0.00120773
STM14_4244	GJ0703GL000396	STY4279	intramembrane serine protease GlpG(glpG)	S. Typhi str. CT18			GO:0005886~plasma membrane,GO:0016021~integral component of membrane,	GO:0004252~serine-type endopeptidase activity,	IPR002610:Peptidase S54, rhomboid,IPR022732:Peptidase S54, GlpG peptidase, N-terminal,IPR022764:Peptidase S54, rhomboid domain,IPR023662:Rhomboid protease GlpG,				Cell inner membrane,Cell membrane,Complete proteome,Hydrolase,Membrane,Protease,Serine protease,Transmembrane,Transmembrane helix,	General function prediction only	active site:Nucleophile,chain:Rhomboid protease glpG,transmembrane region,	1	828	0.00120773
STM14_0600	GJ0703GL003414	STY0558	iron-binding lipoprotein(sfbA)	S. Typhi str. CT18					IPR004872:Lipoprotein NlpA family,	sty02010:ABC transporters,			Complete proteome,Lipoprotein,Signal,	Inorganic ion transport and metabolism	signal peptide,	1	828	0.00120773
STM14_2886	GJ0703GL001607	STY2571	transketolase subunit(STY2571)	S. Typhi str. CT18					IPR005474:Transketolase, N-terminal,	sty00030:Pentose phosphate pathway,sty01100:Metabolic pathways,sty01110:Biosynthesis of secondary metabolites,sty01120:Microbial metabolism in diverse environments,sty01130:Biosynthesis of antibiotics,sty01200:Carbon metabolism,sty01230:Biosynthesis of amino acids,			Complete proteome,	Carbohydrate transport and metabolism		1	828	0.00120773
STM14_1056	GJ0703GL003035	STY0935	hypothetical protein(STY0935)	S. Typhi str. CT18	DNA replication, recombination, and repair,			GO:0004519~endonuclease activity,	IPR006171:Toprim domain,IPR022602:Protein of unknown function DUF2813,IPR027417:P-loop containing nucleoside triphosphate hydrolase,				Complete proteome,Endonuclease,Hydrolase,Nuclease,	DNA replication, recombination, and repair		2	1656	0.00120773
STM14_3001	GJ0703GL001461	STY2680	sulfate ABC transporter permease CysT(STY2680)	S. Typhi str. CT18			GO:0016021~integral component of membrane,	GO:0015419~sulfate transmembrane-transporting ATPase activity,	IPR000515:Binding-protein-dependent transport systems inner membrane component,IPR005667:Sulphate ABC transporter permease protein 2,IPR011865:Sulphate ABC transporter, permease protein CysT,	sty00920:Sulfur metabolism,sty02010:ABC transporters,			Complete proteome,Membrane,Transmembrane,Transmembrane helix,	Posttranslational modification, protein turnover, chaperones	chain:Sulfate transport system permease protein cysT,domain:ABC transmembrane type-1,signal peptide,transmembrane region,	1	831	0.00120337
STM14_0586	GJ0703GL003426	STY0544	copper-transporting ATPase(STY0544)	S. Typhi str. CT18		GO:0006825~copper ion transport,	GO:0005886~plasma membrane,GO:0016021~integral component of membrane,	GO:0005524~ATP binding,GO:0019829~cation-transporting ATPase activity,GO:0046872~metal ion binding,	IPR001757:Cation-transporting P-type ATPase,IPR006121:Heavy metal-associated domain, HMA,IPR008250:P-type ATPase, A domain,IPR017969:Heavy-metal-associated, conserved site,IPR018303:P-type ATPase, phosphorylation site,IPR023214:HAD-like domain,IPR023299:P-type ATPase, cytoplasmic domain N,IPR027256:Cation-transporting P-type ATPase, subfamily IB,				ATP-binding,Cell membrane,Complete proteome,Copper,Copper transport,Hydrolase,Ion transport,Magnesium,Membrane,Metal-binding,Nucleotide-binding,Phosphoprotein,Repeat,Transmembrane,Transmembrane helix,Transport,	Inorganic ion transport and metabolism	active site:4-aspartylphosphate intermediate,chain:Copper-exporting P-type ATPase A,domain:HMA 1,domain:HMA 2,metal ion-binding site:Copper,metal ion-binding site:Magnesium,sequence conflict,transmembrane region,	3	2499	0.00120048
STM14_4853	GJ0703GL004624	STY3838	formate dehydrogenase formation protein FdhD(STY3838)	S. Typhi str. CT18		GO:0006777~Mo-molybdopterin cofactor biosynthetic process,	GO:0005737~cytoplasm,	GO:0016783~sulfurtransferase activity,GO:0097163~sulfur carrier activity,	IPR003786:Formate dehydrogenase, subunit FdhD,IPR016193:Cytidine deaminase-like,		PIRSF015626:formate dehydrogenase accessory protein FdhD,		Complete proteome,Cytoplasm,Molybdenum cofactor biosynthesis,	Energy production and conversion	chain:Protein fdhD,	1	834	0.00119904
STM14_0825	GJ0703GL003216	STY0747	potassium-transporting ATPase subunit A(STY0747)	S. Typhi str. CT18			GO:0005887~integral component of plasma membrane,	GO:0008556~potassium-transporting ATPase activity,GO:0030955~potassium ion binding,	IPR004623:ATPase, K+ transporting, A subunit,	sty02020:Two-component system,	PIRSF001294:H(+)/K(+)-transporting ATPase, subunit A,		Cell inner membrane,Cell membrane,Complete proteome,Ion transport,Membrane,Potassium,Potassium transport,Transmembrane,Transmembrane helix,Transport,	Inorganic ion transport and metabolism	chain:Potassium-transporting ATPase A chain,transmembrane region,	2	1677	0.00119261
STM14_3106	GJ0703GL001368	STY2779	thiosulfate sulfurtransferase(STY2779)	S. Typhi str. CT18				GO:0004792~thiosulfate sulfurtransferase activity,	IPR001307:Thiosulphate sulfurtransferase, conserved site,IPR001763:Rhodanese-like domain,	sty00270:Cysteine and methionine metabolism,sty00920:Sulfur metabolism,sty01100:Metabolic pathways,sty01120:Microbial metabolism in diverse environments,sty04122:Sulfur relay system,		SM00450:RHOD,	Complete proteome,Pyruvate,Transferase,	Inorganic ion transport and metabolism		1	840	0.00119048
STM14_3577	GJ0703GL000982	STY3107	7-cyano-7-deazaguanine reductase(STY3107)	S. Typhi str. CT18	Function unknown,	GO:0008616~queuosine biosynthetic process,	GO:0005737~cytoplasm,	GO:0033739~preQ1 synthase activity,GO:0046857~oxidoreductase activity, acting on other nitrogenous compounds as donors, with NAD or NADP as acceptor,	IPR016428:Nitrile oxidoreductase, NADPH-dependent, YqcD,	sty00790:Folate biosynthesis,sty01100:Metabolic pathways,	PIRSF004750:NADPH-dependent nitrile oxidoreductase, YqcD type,		Complete proteome,Cytoplasm,NADP,Oxidoreductase,Queuosine biosynthesis,	Function unknown	chain:NADPH-dependent 7-cyano-7-deazaguanine reductase,	1	846	0.00118203
STM14_3152	GJ0703GL001326	STY2818	transcriptional regulator(yfhH)	S. Typhi str. CT18		GO:0005975~carbohydrate metabolic process,		GO:0003677~DNA binding,GO:0003700~transcription factor activity, sequence-specific DNA binding,GO:0030246~carbohydrate binding,	IPR000281:Helix-turn-helix protein RpiR,IPR001347:Sugar isomerase (SIS),IPR009057:Homeodomain-like,IPR011991:Winged helix-turn-helix DNA-binding domain,				Complete proteome,	Transcription		1	846	0.00118203
STM14_2150	GJ0703GL002186	STY1905	4-diphosphocytidyl-2C-methyl-D-erythritol kinase(ipk)	S. Typhi str. CT18		GO:0016114~terpenoid biosynthetic process,GO:0019288~isopentenyl diphosphate biosynthetic process, methylerythritol 4-phosphate pathway,		GO:0005524~ATP binding,GO:0050515~4-(cytidine 5'-diphospho)-2-C-methyl-D-erythritol kinase activity,	IPR004424:4-diphosphocytidyl-2C-methyl-D-erythritol kinase,IPR006204:GHMP kinase N-terminal domain,IPR013750:GHMP kinase, C-terminal domain,IPR014721:Ribosomal protein S5 domain 2-type fold, subgroup,IPR020568:Ribosomal protein S5 domain 2-type fold,	sty00900:Terpenoid backbone biosynthesis,sty01100:Metabolic pathways,sty01110:Biosynthesis of secondary metabolites,sty01130:Biosynthesis of antibiotics,	PIRSF010376:4-diphosphocytidyl-2C-methyl-D-erythritol 2-phosphate synthase,		ATP-binding,Complete proteome,Isoprene biosynthesis,Kinase,Nucleotide-binding,Transferase,	Lipid metabolism	chain:4-diphosphocytidyl-2-C-methyl-D- erythritol kinase,nucleotide phosphate-binding region:ATP,sequence conflict,	1	849	0.00117786
STM14_4966	GJ0703GL004524	STY3743	glutamate racemase(STY3743)	S. Typhi str. CT18		GO:0008360~regulation of cell shape,GO:0009252~peptidoglycan biosynthetic process,GO:0071555~cell wall organization,		GO:0008881~glutamate racemase activity,	IPR001920:Asp/Glu racemase,IPR004391:Glutamate racemase,IPR015942:Asp/Glu/hydantoin racemase,IPR018187:Asp/Glu racemase, active site,	sty00471:D-Glutamine and D-glutamate metabolism,sty01100:Metabolic pathways,			Cell shape,Cell wall biogenesis/degradation,Complete proteome,Isomerase,Peptidoglycan synthesis,	Cell envelope biogenesis, outer membrane	chain:Glutamate racemase,sequence conflict,	1	849	0.00117786
STM14_0214	GJ0703GL003761	STY0199	pantoate:beta-alanine ligase(STY0199)	S. Typhi str. CT18		GO:0015940~pantothenate biosynthetic process,	GO:0005737~cytoplasm,	GO:0004592~pantoate-beta-alanine ligase activity,GO:0005524~ATP binding,	IPR003721:Pantoate-beta-alanine ligase,IPR004821:Cytidyltransferase-like domain,IPR014729:Rossmann-like alpha/beta/alpha sandwich fold,	sty00410:beta-Alanine metabolism,sty00770:Pantothenate and CoA biosynthesis,sty01100:Metabolic pathways,sty01110:Biosynthesis of secondary metabolites,			ATP-binding,Complete proteome,Cytoplasm,Ligase,Nucleotide-binding,Pantothenate biosynthesis,		active site:Proton donor,binding site:ATP; via amide nitrogen and carbonyl oxygen,binding site:Beta-alanine,binding site:Pantoate,chain:Pantothenate synthetase,nucleotide phosphate-binding region:ATP,	1	852	0.00117371
STM14_1740	GJ0703GL002558	STY1680	HlyD-family protein(STY1680)	S. Typhi str. CT18	Defense mechanisms,	GO:0055085~transmembrane transport,	GO:0016021~integral component of membrane,		IPR006143:RND efflux pump, membrane fusion protein,				Coiled coil,Complete proteome,Membrane,Transmembrane,Transmembrane helix,	Defense mechanisms		1	858	0.0011655
STM14_0548	GJ0703GL003461	STY0508	acyl-CoA thioesterase II(STY0508)	S. Typhi str. CT18		GO:0006637~acyl-CoA metabolic process,		GO:0047617~acyl-CoA hydrolase activity,	IPR003703:Acyl-CoA thioesterase,	sty01040:Biosynthesis of unsaturated fatty acids,			Complete proteome,	Lipid metabolism		1	858	0.0011655
STM14_5184	GJ0703GL004345	STY4511	hypothetical protein(STY4511)	S. Typhi str. CT18	Function unknown,		GO:0016021~integral component of membrane,		IPR009722:SdiA-regulated,IPR011042:Six-bladed beta-propeller, TolB-like,				Complete proteome,Membrane,Transmembrane,Transmembrane helix,	Function unknown		1	858	0.0011655
STM14_1078	GJ0703GL003001	STY0954	cysteine/glutathione ABC transporter membrane protein/ATP-binding protein CydC(STY0954)	S. Typhi str. CT18			GO:0016021~integral component of membrane,	GO:0005524~ATP binding,GO:0042626~ATPase activity, coupled to transmembrane movement of substances,	IPR003439:ABC transporter-like,IPR003593:AAA+ ATPase domain,IPR011527:ABC transporter, transmembrane domain, type 1,IPR014223:ABC transporter, CydDC cysteine exporter (CydDC-E) family, permease/ATP-binding protein CydC,IPR017871:ABC transporter, conserved site,IPR027417:P-loop containing nucleoside triphosphate hydrolase,	sty02010:ABC transporters,		SM00382:AAA,	ATP-binding,Complete proteome,Membrane,Nucleotide-binding,Transmembrane,Transmembrane helix,	Energy production and conversion / Posttranslational modification, protein turnover, chaperones	signal peptide,	2	1719	0.00116347
STM14_3945	GJ0703GL000652	STY3446	6S rRNA C1402 2'-O-ribose methyltransferase(STY3446)	S. Typhi str. CT18		GO:0000453~enzyme-directed rRNA 2'-O-methylation,	GO:0005737~cytoplasm,	GO:0070677~rRNA (cytosine-2'-O-)-methyltransferase activity,	IPR000878:Tetrapyrrole methylase,IPR008189:rRNA small subunit methyltransferase I,IPR014776:Tetrapyrrole methylase, subdomain 2,IPR014777:Tetrapyrrole methylase, subdomain 1,IPR018063:SAM-dependent methyltransferase RsmI, conserved site,		PIRSF005917:methyltransferase, YraL type,		Complete proteome,Cytoplasm,Methyltransferase,rRNA processing,S-adenosyl-L-methionine,Transferase,	General function prediction only		1	861	0.00116144
STM14_2717	GJ0703GL001737	STY2436	transcriptional regulator(STY2436)	S. Typhi str. CT18		GO:0006351~transcription, DNA-templated,		GO:0003677~DNA binding,GO:0003700~transcription factor activity, sequence-specific DNA binding,	IPR000847:Transcription regulator HTH, LysR,IPR005119:LysR, substrate-binding,IPR011991:Winged helix-turn-helix DNA-binding domain,				Complete proteome,DNA-binding,Transcription,Transcription regulation,	Transcription		1	861	0.00116144
STM14_2295	GJ0703GL002068	STY2095	hex-regulon repressor(STY2095)	S. Typhi str. CT18		GO:0005975~carbohydrate metabolic process,		GO:0003677~DNA binding,GO:0003700~transcription factor activity, sequence-specific DNA binding,GO:0030246~carbohydrate binding,	IPR000281:Helix-turn-helix protein RpiR,IPR001347:Sugar isomerase (SIS),IPR009057:Homeodomain-like,IPR011991:Winged helix-turn-helix DNA-binding domain,				Complete proteome,	Transcription		1	867	0.0011534
STM14_1199	GJ0703GL002948	STY1078	aminopeptidase N(STY1078)	S. Typhi str. CT18				GO:0004177~aminopeptidase activity,GO:0008237~metallopeptidase activity,GO:0008270~zinc ion binding,	IPR001930:Peptidase M1, alanine aminopeptidase/leukotriene A4 hydrolase,IPR012779:Peptidase M1, alanyl aminopeptidase,IPR014782:Peptidase M1, membrane alanine aminopeptidase, N-terminal,IPR024601:Peptidase M1, alanyl aminopeptidase, C-terminal,	sty00480:Glutathione metabolism,sty01100:Metabolic pathways,			Aminopeptidase,Complete proteome,Hydrolase,Protease,	Amino acid transport and metabolism		3	2610	0.00114943
STM14_4027	GJ0703GL000580	STY3516	kinase(STY3516)	S. Typhi str. CT18		GO:0006051~N-acetylmannosamine metabolic process,GO:0019262~N-acetylneuraminate catabolic process,		GO:0005524~ATP binding,GO:0008270~zinc ion binding,GO:0009384~N-acylmannosamine kinase activity,	IPR000600:ROK,IPR023945:N-acetylmannosamine kinase, bacterial,	sty00520:Amino sugar and nucleotide sugar metabolism,sty01100:Metabolic pathways,			ATP-binding,Carbohydrate metabolism,Complete proteome,Kinase,Metal-binding,Nucleotide-binding,Transferase,Zinc,	Transcription / Carbohydrate transport and metabolism	chain:N-acetylmannosamine kinase,metal ion-binding site:Zinc,nucleotide phosphate-binding region:ATP,	1	873	0.00114548
STM14_2094	GJ0703GL002233	STY1320	Mn-containing catalase(STY1320)	S. Typhi str. CT18					IPR007760:Manganese catalase,IPR009078:Ferritin-like superfamily,IPR012347:Ferritin-related,				Complete proteome,	Inorganic ion transport and metabolism		1	876	0.00114155
STM14_4211	GJ0703GL000422	STY4298	heat shock protein(STY4298)	S. Typhi str. CT18		GO:0006457~protein folding,	GO:0005737~cytoplasm,		IPR000397:Heat shock protein Hsp33,IPR016153:Heat shock protein Hsp33, N-terminal,IPR016154:Heat shock protein Hsp33, C-terminal,IPR023212:Heat shock protein Hsp33, helix hairpin bin domain,		PIRSF005261:chaperonin, HSP33 type,		Chaperone,Complete proteome,Cytoplasm,Disulfide bond,Redox-active center,Zinc,	Posttranslational modification, protein turnover, chaperones	chain:33 kDa chaperonin,disulfide bond,	1	876	0.00114155
STM14_3957	GJ0703GL000640	STY3458	protease(STY3458)	S. Typhi str. CT18				GO:0008233~peptidase activity,	IPR001539:Peptidase U32,				Complete proteome,	Posttranslational modification, protein turnover, chaperones		1	876	0.00114155
STM14_1850	GJ0703GL002463	STY1531	ATP/GTP-binding protein(STY1531)	S. Typhi str. CT18									Complete proteome,	Energy production and conversion		1	885	0.00112994
STM14_3465	GJ0703GL001101	STY2988	AraC family transcriptional regulator(sprA)	S. Typhi str. CT18		GO:0006351~transcription, DNA-templated,		GO:0003700~transcription factor activity, sequence-specific DNA binding,GO:0043565~sequence-specific DNA binding,	IPR009057:Homeodomain-like,IPR018060:DNA binding HTH domain, AraC-type,IPR018062:HTH domain AraC-type, conserved site,IPR020449:Transcription regulator HTH, AraC- type,			SM00342:HTH_ARAC,	Activator,Complete proteome,DNA-binding,Transcription,Transcription regulation,	Transcription	chain:Transcriptional regulator sirC,DNA-binding region:H-T-H motif,	1	885	0.00112994
STM14_4705	GJ0703GL004747	STY3649	LysR family transcriptional regulator(STY3649)	S. Typhi str. CT18		GO:0006351~transcription, DNA-templated,GO:0008652~cellular amino acid biosynthetic process,GO:0009082~branched-chain amino acid biosynthetic process,	GO:0005737~cytoplasm,	GO:0003677~DNA binding,GO:0003700~transcription factor activity, sequence-specific DNA binding,	IPR000847:Transcription regulator HTH, LysR,IPR005119:LysR, substrate-binding,IPR011991:Winged helix-turn-helix DNA-binding domain,				Activator,Amino-acid biosynthesis,Branched-chain amino acid biosynthesis,Complete proteome,Cytoplasm,DNA-binding,Repressor,Transcription,Transcription regulation,	Transcription	chain:HTH-type transcriptional activator ilvY,DNA-binding region:H-T-H motif,domain:HTH lysR-type,	1	885	0.00112994
STM14_5136	GJ0703GL004386	STY4468	LysR family transcriptional regulator(STY4468)	S. Typhi str. CT18	Transcription,	GO:0006351~transcription, DNA-templated,		GO:0003677~DNA binding,GO:0003700~transcription factor activity, sequence-specific DNA binding,	IPR000847:Transcription regulator HTH, LysR,IPR005119:LysR, substrate-binding,IPR011991:Winged helix-turn-helix DNA-binding domain,				Complete proteome,DNA-binding,Transcription,Transcription regulation,	Transcription		1	885	0.00112994
STM14_0431	GJ0703GL003570	STY0400	carboxyvinyl-carboxyphosphonate phosphorylmutase(prpB)	S. Typhi str. CT18		GO:0019629~propionate catabolic process, 2-methylcitrate cycle,		GO:0000287~magnesium ion binding,GO:0016740~transferase activity,GO:0046421~methylisocitrate lyase activity,	IPR012695:Methylisocitrate lyase,IPR015813:Pyruvate/Phosphoenolpyruvate kinase-like domain,IPR018523:Isocitrate lyase/phosphorylmutase, conserved site,	sty00640:Propanoate metabolism,			Complete proteome,Lyase,Magnesium,Metal-binding,Transferase,	Carbohydrate transport and metabolism	chain:Methylisocitrate lyase,helix,strand,turn,	1	885	0.00112994
STM14_2711	GJ0703GL001741	STY2431	hydrolase(STY2431)	S. Typhi str. CT18		GO:0006564~L-serine biosynthetic process,		GO:0004647~phosphoserine phosphatase activity,	IPR006383:HAD-superfamily hydrolase, subfamily IB, PSPase-like,IPR023190:Phosphoserine phosphatase, domain 2,IPR023214:HAD-like domain,				3D-structure,Complete proteome,Hydrolase,	Amino acid transport and metabolism		1	885	0.00112994
STM14_3609	GJ0703GL000957	STY3132	exonuclease V subunit(recB)	S. Typhi str. CT18	DNA replication, recombination, and repair,	GO:0000724~double-strand break repair via homologous recombination,		GO:0000287~magnesium ion binding,GO:0003677~DNA binding,GO:0004003~ATP-dependent DNA helicase activity,GO:0005524~ATP binding,GO:0008854~exodeoxyribonuclease V activity,	IPR000212:DNA helicase, UvrD/REP type,IPR004586:Exodeoxyribonuclease V, beta subunit,IPR011335:Restriction endonuclease type II-like,IPR011604:Exonuclease, phage-type/RecB, C-terminal,IPR014016:UvrD-like Helicase, ATP-binding domain,IPR014017:DNA helicase, UvrD-like, C-terminal,IPR027417:P-loop containing nucleoside triphosphate hydrolase,	sty03440:Homologous recombination,			ATP-binding,Complete proteome,DNA damage,DNA repair,DNA-binding,Exonuclease,Helicase,Hydrolase,Magnesium,Metal-binding,Nuclease,Nucleotide-binding,	DNA replication, recombination, and repair		4	3543	0.00112899
STM14_0230	GJ0703GL003749	STY0220	ferrichrome-binding periplasmic protein(STY0220)	S. Typhi str. CT18					IPR002491:ABC transporter periplasmic binding domain,IPR008091:Ferrichrome-binding periplasmic protein,	sty02010:ABC transporters,			Complete proteome,Signal,	Inorganic ion transport and metabolism	signal peptide,	1	888	0.00112613
STM14_1119	GJ0703GL002967	STY0991	hypothetical protein(STY0991)	S. Typhi str. CT18					IPR002575:Aminoglycoside phosphotransferase,IPR011009:Protein kinase-like domain,				Complete proteome,			1	891	0.00112233
STM14_1909	GJ0703GL002408	STY1484	hypothetical protein(STY1484)	S. Typhi str. CT18		GO:0009058~biosynthetic process,		GO:0003824~catalytic activity,	IPR003719:Phenazine biosynthesis PhzF protein,		PIRSF016184:isomerase, PhzF type,		Complete proteome,	General function prediction only		1	891	0.00112233
STM14_3685	GJ0703GL000898	STY3208	hypothetical protein(STY3208)	S. Typhi str. CT18					IPR025737:MetA-pathway of phenol degradation, putative,				Complete proteome,			1	891	0.00112233
STM14_0049	GJ0703GL003928	STY0048	transcriptional activator protein NhaR(STY0048)	S. Typhi str. CT18		GO:0006351~transcription, DNA-templated,		GO:0003677~DNA binding,GO:0003700~transcription factor activity, sequence-specific DNA binding,	IPR000847:Transcription regulator HTH, LysR,IPR005119:LysR, substrate-binding,IPR011991:Winged helix-turn-helix DNA-binding domain,				Complete proteome,DNA-binding,Transcription,Transcription regulation,	Transcription		1	891	0.00112233
STM14_2120	GJ0703GL002210	STY1296	alpha-beta hydrolase(STY1296)	S. Typhi str. CT18		GO:0006629~lipid metabolic process,GO:0046470~phosphatidylcholine metabolic process,		GO:0004622~lysophospholipase activity,	IPR001423:Lysophospholipase patatin, conserved site,IPR002641:Patatin/Phospholipase A2-related,IPR016035:Acyl transferase/acyl hydrolase/lysophospholipase,				Complete proteome,	General function prediction only		1	894	0.00111857
STM14_4836	GJ0703GL004639	STY3855	oxidoreductase(STY3855)	S. Typhi str. CT18	Lipid metabolism,	GO:1902777~6-sulfoquinovose(1-) catabolic process,		GO:0004616~phosphogluconate dehydrogenase (decarboxylating) activity,GO:0051287~NAD binding,GO:0061596~3-sulfolactaldehyde reductase activity,	IPR002204:3-hydroxyisobutyrate dehydrogenase-related, conserved site,IPR006115:6-phosphogluconate dehydrogenase, NADP-binding,IPR008927:6-phosphogluconate dehydrogenase, C-terminal-like,IPR013328:Dehydrogenase, multihelical,IPR015815:Hydroxy monocarboxylic acid anion dehydrogenase, HIBADH-type,IPR016040:NAD(P)-binding domain,	sty00650:Butanoate metabolism,sty01100:Metabolic pathways,sty01200:Carbon metabolism,	PIRSF000103:hydroxy monocarboxylic acid anion dehydrogenase, HIBADH type,		Complete proteome,NAD,Oxidoreductase,	Lipid metabolism	binding site:NAD,chain:Uncharacterized oxidoreductase yihU,nucleotide phosphate-binding region:NAD,	1	894	0.00111857
STM14_2838	GJ0703GL001652	STY2530	4-deoxy-4-formamido-L-arabinose-phosphoundecaprenol deformylase ArnD(STY2530)	S. Typhi str. CT18		GO:0009103~lipopolysaccharide biosynthetic process,GO:0009245~lipid A biosynthetic process,GO:0036108~4-amino-4-deoxy-alpha-L-arabinopyranosyl undecaprenyl phosphate biosynthetic process,GO:0046677~response to antibiotic,		GO:0016811~hydrolase activity, acting on carbon-nitrogen (but not peptide) bonds, in linear amides,	IPR002509:Polysaccharide deacetylase,IPR011330:Glycoside hydrolase/deacetylase, beta/alpha-barrel,IPR023557:4-deoxy-4-formamido-L-arabinose-phosphoundecaprenol deformylase ArnD, probable,	sty00520:Amino sugar and nucleotide sugar metabolism,sty01503:Cationic antimicrobial peptide (CAMP) resistance,			Antibiotic resistance,Complete proteome,Hydrolase,Lipid A biosynthesis,Lipid biosynthesis,Lipid metabolism,Lipopolysaccharide biosynthesis,	Carbohydrate transport and metabolism	chain:Probable 4-deoxy-4-formamido-L-arabinose- phosphoundecaprenol deformylase arnD,	1	897	0.00111483
STM14_2565	GJ0703GL001878	STY2280	ATP phosphoribosyltransferase(STY2280)	S. Typhi str. CT18		GO:0000105~histidine biosynthetic process,	GO:0005737~cytoplasm,	GO:0000287~magnesium ion binding,GO:0003879~ATP phosphoribosyltransferase activity,GO:0005524~ATP binding,	IPR001348:ATP phosphoribosyltransferase HisG,IPR011322:Nitrogen regulatory PII-like, alpha/beta,IPR013115:Histidine biosynthesis HisG, C-terminal,IPR013820:ATP phosphoribosyltransferase, catalytic domain,IPR015867:Nitrogen regulatory protein PII/ATP phosphoribosyltransferase, C-terminal,IPR018198:ATP phosphoribosyltransferase, conserved site,IPR020621:ATP phosphoribosyltransferase HisG, long form,	sty00340:Histidine metabolism,sty01100:Metabolic pathways,sty01110:Biosynthesis of secondary metabolites,sty01230:Biosynthesis of amino acids,			Amino-acid biosynthesis,ATP-binding,Complete proteome,Cytoplasm,Glycosyltransferase,Histidine biosynthesis,Magnesium,Metal-binding,Nucleotide-binding,Transferase,	Amino acid transport and metabolism	chain:ATP phosphoribosyltransferase,	1	897	0.00111483
STM14_985	GJ0703GL003087	STY0883	pyruvate formate-lyase 3 activating enzyme(ybiY)	S. Typhi str. CT18				GO:0016829~lyase activity,GO:0043365~[formate-C-acetyltransferase]-activating enzyme activity,GO:0051539~4 iron, 4 sulfur cluster binding,	IPR001989:Radical-activating enzyme, conserved site,IPR007197:Radical SAM,IPR012839:Glycyl radical enzyme activase,		PIRSF000371:pyruvate formate-lyase activating enzyme with radical SAM domain, YjjW type,		Complete proteome,Lyase,Oxidoreductase,Pyruvate,	Posttranslational modification, protein turnover, chaperones		1	897	0.00111483
STM14_2547	GJ0703GL001893	STY2263	propanediol utilization protein PduX(pduX)	S. Typhi str. CT18	Secondary metabolites biosynthesis, transport, and catabolism,			GO:0005524~ATP binding,	IPR006204:GHMP kinase N-terminal domain,IPR012363:Propanediol utilisation/coumermycin biosynthesis, PduX-related,IPR014721:Ribosomal protein S5 domain 2-type fold, subgroup,IPR020568:Ribosomal protein S5 domain 2-type fold,	sty00860:Porphyrin and chlorophyll metabolism,	PIRSF033887:propanediol utilization/coumermycin biosynthesis protein, PduX type,		Complete proteome,	Secondary metabolites biosynthesis, transport, and catabolism		1	900	0.00111111
STM14_2346	GJ0703GL002026	STY2138	trehalose phosphatase(STY2138)	S. Typhi str. CT18		GO:0005992~trehalose biosynthetic process,		GO:0004805~trehalose-phosphatase activity,GO:0046872~metal ion binding,	IPR003337:Trehalose-phosphatase,IPR006379:HAD-superfamily hydrolase, subfamily IIB,IPR023214:HAD-like domain,	sty00500:Starch and sucrose metabolism,sty01100:Metabolic pathways,			Complete proteome,Hydrolase,Magnesium,Metal-binding,	Carbohydrate transport and metabolism	chain:Trehalose-phosphate phosphatase,sequence conflict,	1	900	0.00111111
STM14_0465	GJ0703GL003539	STY0426	ROK-family protein(STY0426)	S. Typhi str. CT18	Transcription / Carbohydrate transport and metabolism,			GO:0016301~kinase activity,	IPR000600:ROK,	sty00051:Fructose and mannose metabolism,sty00500:Starch and sucrose metabolism,sty00520:Amino sugar and nucleotide sugar metabolism,sty01100:Metabolic pathways,			Complete proteome,Kinase,Transferase,	Transcription / Carbohydrate transport and metabolism		1	906	0.00110375
STM14_5156	GJ0703GL004370	STY4485	membrane-bound beta-hydroxylase(STY4485)	S. Typhi str. CT18		GO:0018193~peptidyl-amino acid modification,	GO:0016021~integral component of membrane,		IPR007803:Aspartyl/Asparaginyl beta-hydroxylase,IPR027443:Isopenicillin N synthase-like,				Complete proteome,Membrane,Transmembrane,Transmembrane helix,	Posttranslational modification, protein turnover, chaperones		1	906	0.00110375
STM14_0074	GJ0703GL003904	STY0072	triphosphoribosyl-dephospho-CoA transferase CitG(citG2)	S. Typhi str. CT18		GO:0016310~phosphorylation,		GO:0005524~ATP binding,GO:0046917~triphosphoribosyl-dephospho-CoA synthase activity,	IPR002736:Triphosphoribosyl-dephospho-CoA protein,IPR017551:Triphosphoribosyl-dephospho-CoA synthase CitG,	sty02020:Two-component system,			ATP-binding,Complete proteome,Nucleotide-binding,Transferase,	Coenzyme metabolism	chain:Probable 2-(5''-triphosphoribosyl)-3'- dephosphocoenzyme-A synthase,chain:Probable 2-(5''-triphosphoribosyl)-3'- dephosphocoenzyme-A synthase 1,	1	906	0.00110375
STM14_1395	GJ0703GL002781	STY1260	fructokinase(STY1260)	S. Typhi str. CT18	Transcription / Carbohydrate transport and metabolism,	GO:0006044~N-acetylglucosamine metabolic process,GO:0009254~peptidoglycan turnover,		GO:0005524~ATP binding,GO:0008270~zinc ion binding,GO:0045127~N-acetylglucosamine kinase activity,	IPR000600:ROK,IPR023505:N-acetyl-D-glucosamine kinase,	sty00520:Amino sugar and nucleotide sugar metabolism,			ATP-binding,Carbohydrate metabolism,Complete proteome,Kinase,Metal-binding,Nucleotide-binding,Transferase,Zinc,	Transcription / Carbohydrate transport and metabolism	chain:N-acetyl-D-glucosamine kinase,metal ion-binding site:Zinc,nucleotide phosphate-binding region:ATP,	1	909	0.00110011
STM14_4407	GJ0703GL000196	STY4143	glycine-tRNA synthetase subunit alpha(STY4143)	S. Typhi str. CT18		GO:0006426~glycyl-tRNA aminoacylation,	GO:0005737~cytoplasm,	GO:0004820~glycine-tRNA ligase activity,GO:0005524~ATP binding,	IPR002310:Glycine-tRNA ligase, alpha subunit,IPR006194:Glycine-tRNA synthetase, heterodimeric,	sty00970:Aminoacyl-tRNA biosynthesis,			Aminoacyl-tRNA synthetase,ATP-binding,Complete proteome,Cytoplasm,Ligase,Nucleotide-binding,Protein biosynthesis,	Translation, ribosomal structure and biogenesis	chain:Glycyl-tRNA synthetase alpha subunit,	1	909	0.00110011
STM14_5089	GJ0703GL004430	STY4428	maltose operon periplasmic protein(STY4428)	S. Typhi str. CT18		GO:0008643~carbohydrate transport,	GO:0042597~periplasmic space,		IPR010794:Maltose operon periplasmic,				Complete proteome,Signal,		chain:Maltose operon periplasmic protein,sequence conflict,signal peptide,	1	915	0.0010929
STM14_3153	GJ0703GL001325	STY2819	oxidoreductase(STY2819)	S. Typhi str. CT18		GO:0015940~pantothenate biosynthetic process,	GO:0005737~cytoplasm,	GO:0008677~2-dehydropantoate 2-reductase activity,GO:0050661~NADP binding,	IPR003710:Ketopantoate reductase ApbA/PanE,IPR008927:6-phosphogluconate dehydrogenase, C-terminal-like,IPR013328:Dehydrogenase, multihelical,IPR013332:Ketopantoate reductase ApbA/PanE, N-terminal,IPR013752:Ketopantoate reductase ApbA/PanE, C-terminal,IPR016040:NAD(P)-binding domain,	sty00770:Pantothenate and CoA biosynthesis,sty01100:Metabolic pathways,sty01110:Biosynthesis of secondary metabolites,			Complete proteome,NADP,Oxidoreductase,Pantothenate biosynthesis,	Coenzyme metabolism		1	915	0.0010929
STM14_1101	GJ0703GL002983	STY0975	hypothetical protein(STY0975)	S. Typhi str. CT18					IPR003776:YcaO-like,				Complete proteome,	Function unknown		2	1833	0.00109111
STM14_993	GJ0703GL003081	STY0889	ABC transporter permease(yliC)	S. Typhi str. CT18		GO:0006810~transport,	GO:0005886~plasma membrane,GO:0016021~integral component of membrane,		IPR000515:Binding-protein-dependent transport systems inner membrane component,	sty02010:ABC transporters,			Cell inner membrane,Cell membrane,Complete proteome,Membrane,Transmembrane,Transmembrane helix,Transport,	Amino acid transport and metabolism / Inorganic ion transport and metabolism	chain:Glutathione transport system permease protein gsiC,domain:ABC transmembrane type-1,signal peptide,topological domain:Cytoplasmic,topological domain:Periplasmic,transmembrane region,	1	918	0.00108932
STM14_0156	GJ0703GL003833	STY0150	D-alanine:D-alanine ligase B(STY0150)	S. Typhi str. CT18		GO:0008360~regulation of cell shape,GO:0009252~peptidoglycan biosynthetic process,GO:0071555~cell wall organization,	GO:0005737~cytoplasm,	GO:0000287~magnesium ion binding,GO:0005524~ATP binding,GO:0008716~D-alanine-D-alanine ligase activity,GO:0030145~manganese ion binding,	IPR000291:D-alanine--D-alanine ligase/VANA/B/C, conserved site,IPR005905:D-alanine--D-alanine ligase,IPR011095:D-alanine--D-alanine ligase, C-terminal,IPR011127:D-alanine--D-alanine ligase, N-terminal domain,IPR011761:ATP-grasp fold,IPR013815:ATP-grasp fold, subdomain 1,IPR013816:ATP-grasp fold, subdomain 2,IPR016185:Pre-ATP-grasp domain,	sty00473:D-Alanine metabolism,sty00550:Peptidoglycan biosynthesis,sty01100:Metabolic pathways,sty01502:Vancomycin resistance,			ATP-binding,Cell shape,Cell wall biogenesis/degradation,Complete proteome,Cytoplasm,Ligase,Magnesium,Manganese,Metal-binding,Nucleotide-binding,Peptidoglycan synthesis,	Cell envelope biogenesis, outer membrane	chain:D-alanine--D-alanine ligase,chain:D-alanine--D-alanine ligase A,chain:D-alanine--D-alanine ligase B,domain:ATP-grasp,helix,metal ion-binding site:Magnesium or manganese 1,metal ion-binding site:Magnesium or manganese 2,nucleotide phosphate-binding region:ATP,sequence variant,strand,turn,	1	918	0.00108932
STM14_3444	GJ0703GL001120	STY2972	formate hydrogenlyase subunit 4(STY2972)	S. Typhi str. CT18			GO:0005886~plasma membrane,GO:0016021~integral component of membrane,	GO:0016491~oxidoreductase activity,GO:0016829~lyase activity,	IPR001694:NADH:ubiquinone oxidoreductase, subunit 1/F420H2 oxidoreductase subunit H,IPR018086:NADH:ubiquinone oxidoreductase, subunit 1, conserved site,				Complete proteome,Lyase,Membrane,NAD,Oxidoreductase,Transmembrane,Transmembrane helix,	Energy production and conversion		1	921	0.00108578
STM14_0807	GJ0703GL003232	STY0730	LysR family transcriptional regulator(STY0730)	S. Typhi str. CT18		GO:0006351~transcription, DNA-templated,		GO:0003677~DNA binding,GO:0003700~transcription factor activity, sequence-specific DNA binding,	IPR000847:Transcription regulator HTH, LysR,IPR005119:LysR, substrate-binding,IPR011991:Winged helix-turn-helix DNA-binding domain,				Complete proteome,DNA-binding,Transcription,Transcription regulation,	Transcription		1	924	0.00108225
STM14_4975	GJ0703GL004521	STY3740	pantothenate kinase(STY3740)	S. Typhi str. CT18		GO:0015937~coenzyme A biosynthetic process,	GO:0005737~cytoplasm,	GO:0004594~pantothenate kinase activity,GO:0005524~ATP binding,	IPR004566:Bacterial pantothenate kinase,IPR006083:Phosphoribulokinase/uridine kinase,IPR027417:P-loop containing nucleoside triphosphate hydrolase,	sty00770:Pantothenate and CoA biosynthesis,sty01100:Metabolic pathways,	PIRSF000545:pantothenate kinase, bacterial type,		ATP-binding,Coenzyme A biosynthesis,Complete proteome,Cytoplasm,Kinase,Nucleotide-binding,Transferase,	Coenzyme metabolism	chain:Pantothenate kinase,nucleotide phosphate-binding region:ATP,	1	924	0.00108225
STM14_1773	GJ0703GL002529	STY1652	DNA sequence-specific contrahelicase(STY1652)	S. Typhi str. CT18		GO:0006274~DNA replication termination,	GO:0005737~cytoplasm,	GO:0003677~DNA binding,	IPR008865:DNA replication terminus site-binding protein,				Complete proteome,Cytoplasm,DNA replication,DNA-binding,		chain:DNA replication terminus site-binding protein,	1	927	0.00107875
STM14_0832	GJ0703GL003210	STY0753	hypothetical protein(STY0753)	S. Typhi str. CT18					IPR003778:Allophanate hydrolase subunit 2,			SM00797:AHS2,	Complete proteome,			1	930	0.00107527
STM14_0104	GJ0703GL003879	STY0101	glutathione-regulated potassium-efflux system protein KefC(STY0101)	S. Typhi str. CT18		GO:0051595~response to methylglyoxal,	GO:0005887~integral component of plasma membrane,	GO:0015299~solute:proton antiporter activity,GO:0015503~glutathione-regulated potassium exporter activity,GO:0015643~toxic substance binding,	IPR003148:Regulator of K+ conductance, N-terminal,IPR004771:K+/H+ exchanger,IPR006036:Potassium uptake protein TrkA,IPR006153:Cation/H+ exchanger,IPR016040:NAD(P)-binding domain,IPR023941:Glutathione-regulated potassium-efflux system protein KefC,				Antiport,Cell inner membrane,Cell membrane,Complete proteome,Ion transport,Membrane,Potassium,Potassium transport,Transmembrane,Transmembrane helix,Transport,	Inorganic ion transport and metabolism	chain:Glutathione-regulated potassium-efflux system protein kefC,domain:RCK N-terminal,topological domain:Cytoplasmic,topological domain:Periplasmic,transmembrane region,	2	1860	0.00107527
STM14_3927	GJ0703GL000668	STY3428	TDC operon transcriptional activator(STY3428)	S. Typhi str. CT18		GO:0006351~transcription, DNA-templated,		GO:0003677~DNA binding,GO:0003700~transcription factor activity, sequence-specific DNA binding,	IPR000847:Transcription regulator HTH, LysR,IPR005119:LysR, substrate-binding,IPR011991:Winged helix-turn-helix DNA-binding domain,				Complete proteome,DNA-binding,Transcription,Transcription regulation,	Transcription		1	936	0.00106838
STM14_0882	GJ0703GL003180	STY0799	cation transport protein(ybgR)	S. Typhi str. CT18			GO:0005886~plasma membrane,GO:0016021~integral component of membrane,	GO:0005385~zinc ion transmembrane transporter activity,	IPR002524:Cation efflux protein,IPR023500:Zinc transporter ZitB,IPR027469:Cation efflux protein transmembrane domain,				Cell inner membrane,Cell membrane,Complete proteome,Ion transport,Membrane,Transmembrane,Transmembrane helix,Transport,Zinc,Zinc transport,	Inorganic ion transport and metabolism	chain:Zinc transporter zitB,compositionally biased region:His-rich,transmembrane region,	1	936	0.00106838
STM14_1259	GJ0703GL002897	STY1143	metal-dependent hydrolase(STY1143)	S. Typhi str. CT18				GO:0016787~hydrolase activity,	IPR001279:Beta-lactamase-like,			SM00849:SM00849,	Complete proteome,Hydrolase,Signal,	General function prediction only		1	936	0.00106838
STM14_2681	GJ0703GL001764	STY2404	tRNA-dihydrouridine synthase C(STY2404)	S. Typhi str. CT18	Translation, ribosomal structure and biogenesis,			GO:0000049~tRNA binding,GO:0010181~FMN binding,GO:0017150~tRNA dihydrouridine synthase activity,GO:0050660~flavin adenine dinucleotide binding,	IPR001269:tRNA-dihydrouridine synthase,IPR013785:Aldolase-type TIM barrel,IPR018517:tRNA-dihydrouridine synthase, conserved site,		PIRSF006621:tRNA-dihydrouridine synthase,		Complete proteome,Flavoprotein,FMN,NADP,Oxidoreductase,RNA-binding,tRNA processing,tRNA-binding,	Translation, ribosomal structure and biogenesis	chain:tRNA-dihydrouridine synthase C,	1	936	0.00106838
STM14_1353	GJ0703GL002820	STY1221	flagellar protein FlgJ(STY1221)	S. Typhi str. CT18		GO:0044780~bacterial-type flagellum assembly,	GO:0031514~motile cilium,	GO:0004040~amidase activity,GO:0016798~hydrolase activity, acting on glycosyl bonds,	IPR002901:Mannosyl-glycoprotein endo-beta-N-acetylglucosamidase,IPR013377:Flagellar protein FlgJ type-2,IPR019301:Flagellar protein FlgJ, N-terminal,			SM00047:LYZ2,	Cell projection,Cilium,Complete proteome,Flagellum,	Cell envelope biogenesis, outer membrane / Cell motility and secretion / Posttranslational modification, protein turnover, chaperones	chain:Peptidoglycan hydrolase flgJ,mutagenesis site,region of interest:Catalytic,	1	948	0.00105485
STM14_1366	GJ0703GL002809	STY1232	3-oxoacyl-ACP synthase III(STY1232)	S. Typhi str. CT18		GO:0006633~fatty acid biosynthetic process,	GO:0005737~cytoplasm,	GO:0004315~3-oxoacyl-[acyl-carrier-protein] synthase activity,GO:0033818~beta-ketoacyl-acyl-carrier-protein synthase III activity,	IPR004655:3-oxoacyl-[acyl-carrier-protein] synthase 3,IPR013747:3-Oxoacyl-[acyl-carrier-protein (ACP)] synthase III C-terminal,IPR013751:3-Oxoacyl-[acyl-carrier-protein (ACP)] synthase III,IPR016039:Thiolase-like,	sty00061:Fatty acid biosynthesis,sty01100:Metabolic pathways,sty01212:Fatty acid metabolism,			Acyltransferase,Complete proteome,Cytoplasm,Fatty acid biosynthesis,Fatty acid metabolism,Lipid biosynthesis,Lipid metabolism,Multifunctional enzyme,Transferase,		chain:3-oxoacyl-[acyl-carrier-protein] synthase 3,region of interest:ACP-binding,	1	951	0.00105152
STM14_1355	GJ0703GL002818	STY1223	flagellar hook-associated protein 3(STY1223)	S. Typhi str. CT18		GO:0071973~bacterial-type flagellum-dependent cell motility,	GO:0009424~bacterial-type flagellum hook,GO:0031514~motile cilium,	GO:0005198~structural molecule activity,	IPR001029:Flagellin, D0/D1 domain,IPR013384:Flagellar hook-associated protein 3,	sty02040:Flagellar assembly,			Bacterial flagellum,Cell projection,Cilium,Complete proteome,Flagellum,	Cell motility and secretion	chain:Flagellar hook-associated protein 3,helix,strand,turn,	1	951	0.00105152
STM14_1030	GJ0703GL003058	STY0912	putrescine ABC transporter permease PotH(STY0912)	S. Typhi str. CT18		GO:0006810~transport,	GO:0005886~plasma membrane,GO:0016021~integral component of membrane,		IPR000515:Binding-protein-dependent transport systems inner membrane component,	sty02010:ABC transporters,			Complete proteome,Membrane,Transmembrane,Transmembrane helix,Transport,	Amino acid transport and metabolism		1	951	0.00105152
STM14_5443	GJ0703GL004088	STY4888	GTP-binding protein(STY4888)	S. Typhi str. CT18					IPR003495:CobW/HypB/UreG domain,IPR011629:Cobalamin (vitamin B12) biosynthesis CobW-like, C-terminal,IPR027417:P-loop containing nucleoside triphosphate hydrolase,			SM00833:SM00833,	Complete proteome,	General function prediction only		1	954	0.00104822
STM14_5339	GJ0703GL004208	STY4787	BglB-family transcriptional antiterminator(STY4787)	S. Typhi str. CT18	Transcription,	GO:0009401~phosphoenolpyruvate-dependent sugar phosphotransferase system,		GO:0003700~transcription factor activity, sequence-specific DNA binding,GO:0008982~protein-N(PI)-phosphohistidine-sugar phosphotransferase activity,	IPR002178:Phosphotransferase system, phosphoenolpyruvate-dependent sugar EIIA 2,IPR003501:Phosphotransferase system, EIIB component, type 2/3,IPR007737:M trans-acting positive regulator,IPR011608:PRD,IPR011991:Winged helix-turn-helix DNA-binding domain,IPR013011:Phosphotransferase system, EIIB component, type 2,IPR013196:Helix-turn-helix, type 11,IPR016152:Phosphotransferase/anion transporter,IPR…				Complete proteome,Transferase,	Transcription		2	1911	0.00104657
STM14_2522	GJ0703GL001917	STY2239	cobalamin biosynthersis protein CbiB(cbiB)	S. Typhi str. CT18		GO:0009236~cobalamin biosynthetic process,	GO:0005886~plasma membrane,GO:0016021~integral component of membrane,	GO:0015420~cobalamin-transporting ATPase activity,GO:0048472~threonine-phosphate decarboxylase activity,	IPR004485:Cobalamin biosynthesis CobD/CbiB,	sty00860:Porphyrin and chlorophyll metabolism,sty01100:Metabolic pathways,			Cell membrane,Cobalamin biosynthesis,Complete proteome,Membrane,Transmembrane,Transmembrane helix,	Coenzyme metabolism	chain:Cobalamin biosynthesis protein cbiB,chain:Threonine-phosphate decarboxylase,helix,modified residue,sequence conflict,strand,transmembrane region,turn,	1	957	0.00104493
STM14_4897	GJ0703GL004577	STY3797	regulatory protein(STY3797)	S. Typhi str. CT18	Transcription,	GO:0006351~transcription, DNA-templated,GO:0006355~regulation of transcription, DNA-templated,	GO:0005737~cytoplasm,	GO:0003677~DNA binding,GO:0030246~carbohydrate binding,	IPR007324:Sugar-binding domain, putative,IPR011991:Winged helix-turn-helix DNA-binding domain,				Complete proteome,Cytoplasm,DNA-binding,Repressor,Transcription,Transcription regulation,	Transcription	chain:Transcriptional regulator lsrR,DNA-binding region:H-T-H motif,	1	957	0.00104493
STM14_4974	GJ0703GL004522	STY3741	bifunctional biotin operon repressor/biotin-[acetyl-CoA carboxylase] synthetase(STY3741)	S. Typhi str. CT18		GO:0006351~transcription, DNA-templated,GO:0006355~regulation of transcription, DNA-templated,GO:0009305~protein biotinylation,		GO:0003677~DNA binding,GO:0004077~biotin-[acetyl-CoA-carboxylase] ligase activity,GO:0005524~ATP binding,	IPR003142:Biotin protein ligase, C-terminal,IPR004143:Biotin/lipoate A/B protein ligase,IPR004408:Biotin--acetyl-CoA-carboxylase ligase,IPR004409:Biotin operon repressor, helix-turn-helix domain,IPR008988:Transcriptional repressor, C-terminal,IPR011991:Winged helix-turn-helix DNA-binding domain,IPR013196:Helix-turn-helix, type 11,	sty00780:Biotin metabolism,sty01100:Metabolic pathways,			ATP-binding,Biotin,Complete proteome,DNA-binding,Ligase,Nucleotide-binding,Repressor,Transcription,Transcription regulation,	Coenzyme metabolism	chain:Bifunctional protein birA,DNA-binding region:H-T-H motif,sequence conflict,	1	960	0.00104167
STM14_941	GJ0703GL003128	STY0846	hypothetical protein(ybhN)	S. Typhi str. CT18	Function unknown,		GO:0016021~integral component of membrane,		IPR022791:Lysylphosphatidylglycerol synthetase/glycosyltransferase AglD,				Complete proteome,Membrane,Transmembrane,Transmembrane helix,	Function unknown	signal peptide,	1	960	0.00104167
STM14_2029	GJ0703GL002285	STY1382	mandelate racemase/muconate lactonizing enzyme family protein(STY1382)	S. Typhi str. CT18	Cell envelope biogenesis, outer membrane / General function prediction only,	GO:0009063~cellular amino acid catabolic process,		GO:0003824~catalytic activity,	IPR001354:Mandelate racemase/muconate lactonizing enzyme,IPR013341:Mandelate racemase/muconate lactonizing enzyme, N-terminal,IPR013342:Mandelate racemase/muconate lactonizing enzyme, C-terminal,IPR018110:Mandelate racemase/muconate lactonizing enzyme, conserved site,			SM00922:SM00922,	Complete proteome,	Cell envelope biogenesis, outer membrane / General function prediction only		1	963	0.00103842
STM14_3423	GJ0703GL001138	STY2954	PTS system glucitol/sorbitol-specific transporter subunit IIBC(STY2954)	S. Typhi str. CT18		GO:0009401~phosphoenolpyruvate-dependent sugar phosphotransferase system,	GO:0016021~integral component of membrane,	GO:0008982~protein-N(PI)-phosphohistidine-sugar phosphotransferase activity,GO:0103111~D-glucosamine PTS permease activity,	IPR004702:Phosphotransferease, sorbitol phosphotransferase enzyme II,IPR011618:Sorbitol phosphotransferase enzyme II, N-terminal,IPR011638:Sorbitol phosphotransferase enzyme II, C-terminal,	sty00051:Fructose and mannose metabolism,sty02060:Phosphotransferase system (PTS),			Complete proteome,Membrane,Transferase,Transmembrane,Transmembrane helix,	Carbohydrate transport and metabolism		1	969	0.00103199
STM14_4396	GJ0703GL000207	STY4156	2-hydroxyacid dehydrogenase(STY4156)	S. Typhi str. CT18	Energy production and conversion / Coenzyme metabolism / General function prediction only,		GO:0005737~cytoplasm,GO:0005886~plasma membrane,	GO:0016618~hydroxypyruvate reductase activity,GO:0030267~glyoxylate reductase (NADP) activity,GO:0051287~NAD binding,	IPR006139:D-isomer specific 2-hydroxyacid dehydrogenase, catalytic domain,IPR006140:D-isomer specific 2-hydroxyacid dehydrogenase, NAD-binding,IPR016040:NAD(P)-binding domain,IPR023756:Glyoxylate/hydroxypyruvate reductase B,	sty00030:Pentose phosphate pathway,sty01100:Metabolic pathways,sty01120:Microbial metabolism in diverse environments,			Complete proteome,Cytoplasm,NAD,NADP,Oxidoreductase,	Energy production and conversion / Coenzyme metabolism / General function prediction only	active site:Proton donor,chain:Glyoxylate/hydroxypyruvate reductase B,	1	972	0.00102881
STM14_3681	GJ0703GL000902	STY3204	global regulator(STY3204)	S. Typhi str. CT18		GO:0008033~tRNA processing,GO:0009451~RNA modification,	GO:0005737~cytoplasm,	GO:0005542~folic acid binding,	IPR006222:Glycine cleavage T-protein, N-terminal,IPR017703:YgfZ/GcvT conserved site,IPR023758:tRNA-modifying protein YgfZ,				Complete proteome,Cytoplasm,Folate-binding,tRNA processing,	General function prediction only	binding site:Folate,chain:tRNA-modifying protein ygfZ,	1	978	0.00102249
STM14_0195	GJ0703GL003787	STY0185	PdxA-like protein(STY0185)	S. Typhi str. CT18		GO:0008615~pyridoxine biosynthetic process,GO:0042823~pyridoxal phosphate biosynthetic process,	GO:0005737~cytoplasm,	GO:0000287~magnesium ion binding,GO:0008270~zinc ion binding,GO:0050570~4-hydroxythreonine-4-phosphate dehydrogenase activity,GO:0050897~cobalt ion binding,GO:0051287~NAD binding,	IPR005255:4-hydroxythreonine-4-phosphate dehydrogenase PdxA,IPR024084:Isopropylmalate dehydrogenase-like domain,	sty00750:Vitamin B6 metabolism,sty01100:Metabolic pathways,			Cobalt,Complete proteome,Cytoplasm,Magnesium,Metal-binding,NAD,NADP,Oxidoreductase,Pyridoxine biosynthesis,Zinc,	Coenzyme metabolism	binding site:Substrate,chain:4-hydroxythreonine-4-phosphate dehydrogenase,chain:4-hydroxythreonine-4-phosphate dehydrogenase 1,chain:4-hydroxythreonine-4-phosphate dehydrogenase 2,helix,metal ion-binding site:Divalent metal cation; shared with dimeric partner,strand,turn,	1	981	0.00101937
STM14_5103	GJ0703GL004417	STY4441	quinone oxidoreductase(STY4441)	S. Typhi str. CT18				GO:0003960~NADPH:quinone reductase activity,GO:0008270~zinc ion binding,	IPR002085:Alcohol dehydrogenase superfamily, zinc-type,IPR002364:Quinone oxidoreductase/zeta-crystallin, conserved site,IPR011032:GroES-like,IPR013149:Alcohol dehydrogenase, C-terminal,IPR013154:Alcohol dehydrogenase GroES-like,IPR016040:NAD(P)-binding domain,IPR020843:Polyketide synthase, enoylreductase,			SM00829:SM00829,	Complete proteome,Oxidoreductase,	Energy production and conversion / General function prediction only	chain:Quinone oxidoreductase,sequence conflict,	1	981	0.00101937
STM14_2371	GJ0703GL002006	STY2161	deaminase(STY2161)	S. Typhi str. CT18	Amino acid transport and metabolism,	GO:0046416~D-amino acid metabolic process,		GO:0019148~D-cysteine desulfhydrase activity,	IPR001926:Tryptophan synthase beta subunit-like PLP-dependent enzymes superfamily,IPR005966:D-cysteine desulfhydrase,IPR023702:D-cysteine desulphhydrase, bacterial,IPR027278:1-aminocyclopropane-1-carboxylate deaminase/D-cysteine desulfhydrase,	sty00270:Cysteine and methionine metabolism,	PIRSF006278:1-aminocyclopropane-1-carboxylate deaminase/D-cysteine desulfhydrase ,		Complete proteome,Lyase,Pyridoxal phosphate,	Amino acid transport and metabolism	chain:D-cysteine desulfhydrase,modified residue,	1	984	0.00101626
STM14_4805	GJ0703GL004665	STY3884	serine/threonine protein kinase(STY3884)	S. Typhi str. CT18		GO:0006950~response to stress,	GO:0005737~cytoplasm,	GO:0000287~magnesium ion binding,GO:0004674~protein serine/threonine kinase activity,GO:0005524~ATP binding,	IPR002575:Aminoglycoside phosphotransferase,IPR011009:Protein kinase-like domain,				ATP-binding,Complete proteome,Cytoplasm,Kinase,Magnesium,Metal-binding,Nucleotide-binding,Phosphoprotein,Serine/threonine-protein kinase,Stress response,Transferase,		chain:Protein rdoA,	1	984	0.00101626
STM14_3926	GJ0703GL000669	STY3427	catabolic threonine dehydratase(STY3427)	S. Typhi str. CT18		GO:0006567~threonine catabolic process,		GO:0000166~nucleotide binding,GO:0003941~L-serine ammonia-lyase activity,GO:0004794~L-threonine ammonia-lyase activity,GO:0030170~pyridoxal phosphate binding,	IPR000634:Serine/threonine dehydratase, pyridoxal-phosphate-binding site,IPR001926:Tryptophan synthase beta subunit-like PLP-dependent enzymes superfamily,IPR005789:Threonine dehydratase, catabolic,	sty00260:Glycine, serine and threonine metabolism,sty00290:Valine, leucine and isoleucine biosynthesis,sty01100:Metabolic pathways,sty01110:Biosynthesis of secondary metabolites,sty01130:Biosynthesis of antibiotics,sty01200:Carbon metabolism,sty01230:Biosynthesis of amino acids,			Complete proteome,Lyase,Nucleotide-binding,Pyridoxal phosphate,	Amino acid transport and metabolism	chain:Threonine dehydratase catabolic,helix,modified residue,sequence conflict,strand,turn,	1	987	0.00101317
STM14_4683	GJ0703GL004761	STY3891	ribose operon repressor(STY3891)	S. Typhi str. CT18		GO:0006351~transcription, DNA-templated,GO:0006355~regulation of transcription, DNA-templated,		GO:0003677~DNA binding,	IPR000843:Transcription regulator HTH, LacI,IPR010982:Lambda repressor-like, DNA-binding domain,			SM00354:HTH_LACI,	Complete proteome,DNA-binding,Transcription,Transcription regulation,	Transcription		1	987	0.00101317
STM14_2045	GJ0703GL002271	STY1356	peptide ABC transporter ATP-binding protein SapD(STY1356)	S. Typhi str. CT18	Defense mechanisms,	GO:0015833~peptide transport,		GO:0005524~ATP binding,GO:0016887~ATPase activity,	IPR003439:ABC transporter-like,IPR003593:AAA+ ATPase domain,IPR013563:Oligopeptide/dipeptide ABC transporter, C-terminal,IPR027417:P-loop containing nucleoside triphosphate hydrolase,	sty01503:Cationic antimicrobial peptide (CAMP) resistance,sty02010:ABC transporters,		SM00382:AAA,	ATP-binding,Complete proteome,Nucleotide-binding,Transport,	Defense mechanisms	chain:Peptide transport system ATP-binding protein sapD,domain:ABC transporter,nucleotide phosphate-binding region:ATP,sequence conflict,	1	990	0.0010101
STM14_2960	GJ0703GL001494	STY2647	ion-channel protein(STY2647)	S. Typhi str. CT18					IPR001395:Aldo/keto reductase,IPR005399:Potassium channel, voltage-dependent, beta subunit, KCNAB-related,IPR023210:NADP-dependent oxidoreductase domain,				Complete proteome,	Energy production and conversion		1	996	0.00100402
STM14_2928	GJ0703GL001570	STY2610	bifunctional tRNA (mnm(5)s(2)U34)-methyltransferase/FAD-dependent cmnm(5)s(2)U34 oxidoreductase(STY2610)	S. Typhi str. CT18		GO:0002097~tRNA wobble base modification,	GO:0005737~cytoplasm,	GO:0004808~tRNA (5-methylaminomethyl-2-thiouridylate)-methyltransferase activity,GO:0016645~oxidoreductase activity, acting on the CH-NH group of donors,GO:0050660~flavin adenine dinucleotide binding,	IPR006076:FAD dependent oxidoreductase,IPR008471:MnmC-like methyltransferase,IPR017610:tRNA U-34 5-methylaminomethyl-2-thiouridine biosynthesis protein MnmC, C-terminal,IPR023032:tRNA 5-methylaminomethyl-2-thiouridine biosynthesis bifunctional protein MnmC,IPR023753:Pyridine nucleotide-disulphide oxidoreductase, FAD/NAD(P)-binding domain,				Complete proteome,Cytoplasm,FAD,Flavoprotein,Methyltransferase,Multifunctional enzyme,Oxidoreductase,S-adenosyl-L-methionine,Transferase,tRNA processing,		chain:tRNA 5-methylaminomethyl-2-thiouridine biosynthesis bifunctional protein mnmC,region of interest:FAD-dependent cmnm(5)s(2)U34 oxidoreductase,region of interest:tRNA (mnm(5)s(2)U34)-methyltransferase,	2	1998	0.001001
STM14_1374	GJ0703GL002801	STY1240	DNA polymerase III subunit delta'(STY1240)	S. Typhi str. CT18		GO:0006260~DNA replication,	GO:0009360~DNA polymerase III complex,	GO:0003677~DNA binding,GO:0003887~DNA-directed DNA polymerase activity,GO:0008408~3'-5' exonuclease activity,	IPR004622:DNA polymerase III, delta prime subunit,IPR008921:DNA polymerase III, clamp loader complex, gamma/delta/delta subunit, C-terminal,IPR015199:DNA polymerase III, delta subunit, C-terminal,IPR027417:P-loop containing nucleoside triphosphate hydrolase,	sty00230:Purine metabolism,sty00240:Pyrimidine metabolism,sty01100:Metabolic pathways,sty03030:DNA replication,sty03430:Mismatch repair,sty03440:Homologous recombination,			Complete proteome,	DNA replication, recombination, and repair		1	1002	0.000998004
STM14_2644	GJ0703GL001797	STY2372	hydrolase(STY2372)	S. Typhi str. CT18				GO:0016787~hydrolase activity,	IPR005502:ADP-ribosylation/Crystallin J1,				Complete proteome,Hydrolase,	Posttranslational modification, protein turnover, chaperones		1	1002	0.000998004
STM14_2106	GJ0703GL002221	STY1309	oligopeptide ABC transporter ATP-binding protein OppF(STY1309)	S. Typhi str. CT18		GO:0015833~peptide transport,		GO:0005524~ATP binding,GO:0016887~ATPase activity,	IPR003439:ABC transporter-like,IPR003593:AAA+ ATPase domain,IPR013563:Oligopeptide/dipeptide ABC transporter, C-terminal,IPR017871:ABC transporter, conserved site,IPR027417:P-loop containing nucleoside triphosphate hydrolase,	sty01501:beta-Lactam resistance,sty02010:ABC transporters,		SM00382:AAA,	ATP-binding,Complete proteome,Nucleotide-binding,	Amino acid transport and metabolism	chain:Oligopeptide transport ATP-binding protein oppF,domain:ABC transporter,nucleotide phosphate-binding region:ATP,sequence conflict,	1	1002	0.000998004
STM14_4353	GJ0703GL000242	STY4188	diguanylate cyclase(STY4188)	S. Typhi str. CT18			GO:0016021~integral component of membrane,	GO:0004871~signal transducer activity,	IPR000160:GGDEF domain,IPR001633:Diguanylate phosphodiesterase, EAL domain,IPR003660:HAMP linker domain,			SM00052:DUF2,SM00267:DUF1,	Complete proteome,Membrane,Transmembrane,Transmembrane helix,	Signal transduction mechanisms		2	2004	0.000998004
STM14_0031	GJ0703GL003945	STY0029	fimbrial subunit(bcfD)	S. Typhi str. CT18		GO:0007155~cell adhesion,	GO:0009289~pilus,		IPR000259:Fimbrial-type adhesion domain,IPR008966:Adhesion domain,				Complete proteome,Signal,	Cell motility and secretion / Intracellular trafficking and secretion	signal peptide,	1	1005	0.000995025
STM14_2336	GJ0703GL002033	STY2130	chemotaxis protein CheA(STY2130)	S. Typhi str. CT18		GO:0006935~chemotaxis,	GO:0005737~cytoplasm,	GO:0000155~phosphorelay sensor kinase activity,GO:0005524~ATP binding,	IPR002545:CheW-like protein,IPR003594:Histidine kinase-like ATPase, ATP-binding domain,IPR003661:Signal transduction histidine kinase, subgroup 1, dimerisation/phosphoacceptor domain,IPR004105:Signal transduction histidine kinase, subgroup, homodimeric,IPR004358:Signal transduction histidine kinase-related protein, C-terminal,IPR005467:Signal transduction histidine kinase, core,IPR008207:Signal t…	sty02020:Two-component system,sty02030:Bacterial chemotaxis,		SM00073:HPT,SM00260:CheW,SM00387:HATPase_c,SM01231:SM01231,	ATP-binding,Complete proteome,Kinase,Nucleotide-binding,Transferase,	Cell motility and secretion / Signal transduction mechanisms	chain:Chemotaxis protein cheA,domain:CheW-like,domain:Histidine kinase,domain:HPt,helix,modified residue,	2	2013	0.000993542
STM14_3454	GJ0703GL001110	STY2980	hydrogenase isoenzymes formation protein HypE(STY2980)	S. Typhi str. CT18					IPR010918:AIR synthase-related protein, C-terminal domain,IPR011854:Hydrogenase expression/formation protein HypE,IPR016188:PurM, N-terminal-like,		PIRSF005644:[NiFe]-hydrogenase maturation factor, AIR synthase-related, HypE type,		Complete proteome,	Posttranslational modification, protein turnover, chaperones		1	1008	0.000992063
STM14_4478	GJ0703GL000132	STY4078	lipopolysaccharide 1,2-glucosyltransferase(waaJ)	S. Typhi str. CT18	Cell envelope biogenesis, outer membrane,			GO:0008918~lipopolysaccharide 3-alpha-galactosyltransferase activity,GO:0008919~lipopolysaccharide glucosyltransferase I activity,	IPR002495:Glycosyl transferase, family 8,IPR013645:Glycosyl transferase, family 8, C-terminal,	sty00540:Lipopolysaccharide biosynthesis,sty01100:Metabolic pathways,			Complete proteome,Glycosyltransferase,Transferase,	Cell envelope biogenesis, outer membrane		1	1008	0.000992063
STM14_0423	GJ0703GL003578	STY0393	terminal oxidase subunit II(STY0393)	S. Typhi str. CT18	Energy production and conversion,	GO:0055114~oxidation-reduction process,	GO:0016021~integral component of membrane,		IPR003317:Cytochrome d ubiquinol oxidase, subunit II,	sty00190:Oxidative phosphorylation,sty01100:Metabolic pathways,sty02020:Two-component system,	PIRSF000267:cytochrome oxidase, subunit 2,		Complete proteome,Membrane,Transmembrane,Transmembrane helix,			1	1008	0.000992063
STM14_0507	GJ0703GL003500	STY0468	2-aminoethylphosphonate transporter substrate-binding protein PhnS(phnS)	S. Typhi str. CT18	Coenzyme metabolism,	GO:0006810~transport,	GO:0042597~periplasmic space,		IPR017637:2-aminoethylphosphonate ABC transporter, 2-aminoethylphosphonate binding protein,	sty02010:ABC transporters,			Complete proteome,Periplasm,Signal,Transport,	Inorganic ion transport and metabolism	chain:Putative 2-aminoethylphosphonate-binding periplasmic protein,signal peptide,	1	1011	0.00098912
STM14_1947	GJ0703GL002381	STY1455	tellurite resistance protein TehA(STY1455)	S. Typhi str. CT18	Inorganic ion transport and metabolism,	GO:0055085~transmembrane transport,	GO:0016021~integral component of membrane,		IPR004695:C4-dicarboxylate transporter/malic acid transport protein,IPR011552:Tellurite resistance protein TehA/malic acid transport protein,				Complete proteome,Membrane,Transmembrane,Transmembrane helix,	Inorganic ion transport and metabolism		1	1011	0.00098912
STM14_5412	GJ0703GL004113	STY4863	tryptophanyl-tRNA synthetase(trpS2)	S. Typhi str. CT18		GO:0006436~tryptophanyl-tRNA aminoacylation,	GO:0005737~cytoplasm,	GO:0004830~tryptophan-tRNA ligase activity,GO:0005524~ATP binding,	IPR001412:Aminoacyl-tRNA synthetase, class I, conserved site,IPR002305:Aminoacyl-tRNA synthetase, class Ic,IPR002306:Tryptophan-tRNA ligase,IPR014729:Rossmann-like alpha/beta/alpha sandwich fold,	sty00970:Aminoacyl-tRNA biosynthesis,			Aminoacyl-tRNA synthetase,ATP-binding,Complete proteome,Ligase,Nucleotide-binding,Protein biosynthesis,	Translation, ribosomal structure and biogenesis		1	1011	0.00098912
STM14_5497	GJ0703GL003994	STY4923	lipoate-protein ligase A(lplA)	S. Typhi str. CT18		GO:0018055~peptidyl-lysine lipoylation,	GO:0005737~cytoplasm,	GO:0005524~ATP binding,GO:0016979~lipoate-protein ligase activity,	IPR004143:Biotin/lipoate A/B protein ligase,IPR004562:Lipoyltransferase/lipoate-protein ligase,IPR019491:Lipoate protein ligase, C-terminal,IPR023741:Lipoate-protein ligase A,	sty00785:Lipoic acid metabolism,sty01100:Metabolic pathways,			ATP-binding,Complete proteome,Cytoplasm,Ligase,Nucleotide-binding,	Coenzyme metabolism	binding site:ATP,binding site:Lipoate,chain:Lipoate-protein ligase A,nucleotide phosphate-binding region:ATP,	1	1014	0.000986193
STM14_3002	GJ0703GL001460	STY2681	sulfate ABC transporter substrate-binding protein(STY2681)	S. Typhi str. CT18			GO:0030288~outer membrane-bounded periplasmic space,	GO:0008271~secondary active sulfate transmembrane transporter activity,GO:0015419~sulfate transmembrane-transporting ATPase activity,	IPR000957:Sulphate/thiosulphate-binding, conserved site,IPR005669:Thiosulphate/Sulfate-binding protein,	sty00920:Sulfur metabolism,sty02010:ABC transporters,			Complete proteome,Signal,	Inorganic ion transport and metabolism	chain:Thiosulfate-binding protein,sequence conflict,signal peptide,	1	1014	0.000986193
STM14_3946	GJ0703GL000651	STY3447	hypothetical protein(STY3447)	S. Typhi str. CT18	General function prediction only,	GO:0008360~regulation of cell shape,GO:0009252~peptidoglycan biosynthetic process,	GO:0031241~periplasmic side of cell outer membrane,	GO:0030234~enzyme regulator activity,	IPR007443:Penicillin-binding protein activator LpoA,				Cell outer membrane,Cell shape,Complete proteome,Lipoprotein,Membrane,Palmitate,Peptidoglycan synthesis,Signal,	General function prediction only		2	2040	0.000980392
STM14_2742	GJ0703GL001718	STY2454	binding-protein-dependent transporter(STY2454)	S. Typhi str. CT18		GO:0006810~transport,	GO:0005886~plasma membrane,GO:0016021~integral component of membrane,		IPR000515:Binding-protein-dependent transport systems inner membrane component,IPR025966:Oligopeptide transport permease C-like, N-terminal domain,	sty02010:ABC transporters,			Cell membrane,Complete proteome,Membrane,Transmembrane,Transmembrane helix,Transport,	General function prediction only	signal peptide,	1	1023	0.000977517
STM14_4922	GJ0703GL004556	STY3776	transcriptional repressor(STY3776)	S. Typhi str. CT18		GO:0006351~transcription, DNA-templated,GO:0006355~regulation of transcription, DNA-templated,		GO:0003677~DNA binding,	IPR000843:Transcription regulator HTH, LacI,IPR010982:Lambda repressor-like, DNA-binding domain,			SM00354:HTH_LACI,	Complete proteome,DNA-binding,Transcription,Transcription regulation,			1	1023	0.000977517
STM14_5473	GJ0703GL004065	STY4906	16S rRNA methyltransferase(STY4906)	S. Typhi str. CT18			GO:0005737~cytoplasm,	GO:0003676~nucleic acid binding,GO:0052914~16S rRNA (guanine(1207)-N(2))-methyltransferase activity,	IPR002052:DNA methylase, N-6 adenine-specific, conserved site,IPR007848:Methyltransferase small domain,IPR013675:Methyltransferase small, N-terminal,IPR023543:rRNA small subunit methyltransferase C,				Complete proteome,Cytoplasm,Methyltransferase,rRNA processing,S-adenosyl-L-methionine,Transferase,	Translation, ribosomal structure and biogenesis	chain:Ribosomal RNA small subunit methyltransferase C,	1	1026	0.000974659
STM14_0231	GJ0703GL003748	STY0221	ferrichrome transport protein FhuB(STY0221)	S. Typhi str. CT18			GO:0005886~plasma membrane,GO:0016021~integral component of membrane,	GO:0005215~transporter activity,	IPR000522:ABC transporter, permease protein,	sty02010:ABC transporters,			Cell membrane,Complete proteome,Membrane,Transmembrane,Transmembrane helix,Transport,	Inorganic ion transport and metabolism	chain:Iron(3+)-hydroxamate import system permease protein fhuB,sequence conflict,transmembrane region,	2	2055	0.000973236
STM14_2010	GJ0703GL002313	STY1401	MscS family inner membrane protein(STY1401)	S. Typhi str. CT18		GO:0055085~transmembrane transport,	GO:0016021~integral component of membrane,		IPR006685:Mechanosensitive ion channel MscS,IPR006686:Mechanosensitive ion channel MscS, conserved site,IPR010920:Like-Sm (LSM) domain,IPR011014:Mechanosensitive ion channel MscS, transmembrane-2,IPR011066:Mechanosensitive ion channel MscS, C-terminal,				Complete proteome,Membrane,Transmembrane,Transmembrane helix,	Cell envelope biogenesis, outer membrane		1	1029	0.000971817
STM14_4467	GJ0703GL000142	STY4088	glycosyltransferase(STY4088)	S. Typhi str. CT18	Cell envelope biogenesis, outer membrane,			GO:0016740~transferase activity,	IPR001173:Glycosyl transferase, family 2,				Complete proteome,Transferase,	Cell envelope biogenesis, outer membrane		1	1032	0.000968992
STM14_3051	GJ0703GL001417	STY2726	lipoprotein(STY2726)	S. Typhi str. CT18		GO:0043165~Gram-negative-bacterium-type cell outer membrane assembly,GO:0051205~protein insertion into membrane,	GO:0009279~cell outer membrane,		IPR010653:Lipoprotein, NlpB,IPR014524:Outer membrane protein assembly factor BamC,		PIRSF026343:lipoprotein, NlpB type,		Cell outer membrane,Complete proteome,Lipoprotein,Membrane,Palmitate,Signal,		signal peptide,	1	1032	0.000968992
STM14_4406	GJ0703GL000197	STY4144	glycine-tRNA synthetase subunit beta(STY4144)	S. Typhi str. CT18		GO:0006420~arginyl-tRNA aminoacylation,GO:0006426~glycyl-tRNA aminoacylation,	GO:0005737~cytoplasm,	GO:0004814~arginine-tRNA ligase activity,GO:0004820~glycine-tRNA ligase activity,GO:0005524~ATP binding,	IPR006194:Glycine-tRNA synthetase, heterodimeric,IPR008909:DALR anticodon binding,IPR015944:Glycine-tRNA ligase, beta subunit,	sty00970:Aminoacyl-tRNA biosynthesis,			Aminoacyl-tRNA synthetase,ATP-binding,Complete proteome,Cytoplasm,Ligase,Nucleotide-binding,Protein biosynthesis,	Translation, ribosomal structure and biogenesis	chain:Glycyl-tRNA synthetase beta subunit,	2	2067	0.000967586
STM14_3632	GJ0703GL000943	STY3151	oxidoreductase(STY3151)	S. Typhi str. CT18				GO:0016491~oxidoreductase activity,	IPR001395:Aldo/keto reductase,IPR020471:Aldo/keto reductase subgroup,IPR023210:NADP-dependent oxidoreductase domain,				Complete proteome,	Energy production and conversion		1	1038	0.000963391
STM14_4652	GJ0703GL004792	STY3926	phosphate ABC transporter substrate-binding protein(STY3926)	S. Typhi str. CT18		GO:0035435~phosphate ion transmembrane transport,	GO:0043190~ATP-binding cassette (ABC) transporter complex,	GO:0042301~phosphate ion binding,	IPR005673:ABC transporter, phosphate-binding protein PstS,IPR024370:PBP domain,	sty02010:ABC transporters,sty02020:Two-component system,	PIRSF002756:ABC-type phosphate transporter, substrate-binding component,		Complete proteome,Phosphate transport,Signal,Transport,	Inorganic ion transport and metabolism	signal peptide,	1	1038	0.000963391
STM14_4900	GJ0703GL004575	STY3795	ABC transporter permease(STY3795)	S. Typhi str. CT18			GO:0005886~plasma membrane,GO:0016021~integral component of membrane,	GO:0005215~transporter activity,	IPR001851:ABC transporter, permease,	sty02010:ABC transporters,			Cell inner membrane,Cell membrane,Complete proteome,Membrane,Transmembrane,Transmembrane helix,Transport,	Carbohydrate transport and metabolism	chain:Autoinducer 2 import system permease protein lsrC,transmembrane region,	1	1041	0.000960615
STM14_0880	GJ0703GL003182	STY0797	quinolinate synthetase A protein(STY0797)	S. Typhi str. CT18		GO:0009435~NAD biosynthetic process,	GO:0005737~cytoplasm,	GO:0008987~quinolinate synthetase A activity,GO:0016765~transferase activity, transferring alkyl or aryl (other than methyl) groups,GO:0046872~metal ion binding,GO:0051539~4 iron, 4 sulfur cluster binding,	IPR003473:Quinolinate synthetase A,IPR023513:Quinolinate synthase A, type 1,	sty00760:Nicotinate and nicotinamide metabolism,sty01100:Metabolic pathways,			4Fe-4S,Complete proteome,Cytoplasm,Iron,Iron-sulfur,Metal-binding,Pyridine nucleotide biosynthesis,Transferase,	Coenzyme metabolism	binding site:Iminoaspartate,binding site:Iminoaspartate; via amide nitrogen,chain:Quinolinate synthetase A,	1	1041	0.000960615
STM14_0848	GJ0703GL003207	STY0772	ammonia monooxygenase(STY0772)	S. Typhi str. CT18	General function prediction only,	GO:0010468~regulation of gene expression,	GO:0016021~integral component of membrane,		IPR007820:Putative ammonia monooxygenase/protein AbrB,IPR017516:AbrB duplication,		PIRSF038991:protein AbrB,		Complete proteome,Membrane,Transmembrane,Transmembrane helix,	General function prediction only		1	1044	0.000957854
STM14_0467	GJ0703GL003537	STY0429	exonuclease SbcC(STY0429)	S. Typhi str. CT18		GO:0006281~DNA repair,		GO:0004527~exonuclease activity,	IPR004592:Nuclease SbcC, gammaproteobacteria type,IPR027050:Nuclease SbcCD subunit C,IPR027417:P-loop containing nucleoside triphosphate hydrolase,				Complete proteome,Exonuclease,Hydrolase,Nuclease,	DNA replication, recombination, and repair		3	3138	0.000956023
STM14_2719	GJ0703GL001736	STY2437	hypothetical protein(STY2437)	S. Typhi str. CT18			GO:0005886~plasma membrane,GO:0016021~integral component of membrane,		IPR004630:Uncharacterised protein family UPF0324, bacteria,IPR018383:Uncharacterised protein family UPF0324, prokaryote,				Cell inner membrane,Cell membrane,Complete proteome,Membrane,Transmembrane,Transmembrane helix,	Function unknown	chain:UPF0324 inner membrane protein yeiH,signal peptide,topological domain:Cytoplasmic,topological domain:Periplasmic,transmembrane region,	1	1047	0.00095511
STM14_3755	GJ0703GL000827	STY3265	A/G-specific adenine glycosylase(STY3265)	S. Typhi str. CT18		GO:0006284~base-excision repair,		GO:0003677~DNA binding,GO:0019104~DNA N-glycosylase activity,GO:0051539~4 iron, 4 sulfur cluster binding,	IPR000445:Helix-hairpin-helix motif,IPR003265:HhH-GPD domain,IPR003651:Endonuclease III-like, iron-sulphur cluster loop motif,IPR004035:Endonuclease III, iron-sulphur binding site,IPR004036:Endonuclease III, conserved site-2,IPR005760:A/G-specific adenine glycosylase MutY, bacterial form,IPR011257:DNA glycosylase,IPR015797:NUDIX hydrolase domain-like,IPR023170:Helix-turn-helix, base-excision DNA …	sty03410:Base excision repair,		SM00478:ENDO3c,SM00525:FES,	Complete proteome,	DNA replication, recombination, and repair	chain:A/G-specific adenine glycosylase,metal ion-binding site:Iron-sulfur (4Fe-4S),	1	1050	0.000952381
STM14_2796	GJ0703GL001685	STY2492	thiamine biosynthesis lipoprotein ApbE(STY2492)	S. Typhi str. CT18		GO:0017013~protein flavinylation,	GO:0005886~plasma membrane,	GO:0016740~transferase activity,GO:0046872~metal ion binding,	IPR003374:ApbE family,IPR024932:Thiamine biosynthesis lipoprotein ApbE,		PIRSF006268:thiamine biosynthesis FAD-binding lipoprotein ApbE,		Cell inner membrane,Cell membrane,Complete proteome,FAD,Flavoprotein,Lipoprotein,Magnesium,Membrane,Metal-binding,Signal,Transferase,	Coenzyme metabolism		1	1050	0.000952381
STM14_2516	GJ0703GL001923	STY2233	cobalamin biosynthesis protein CbiG(cbiG)	S. Typhi str. CT18		GO:0009236~cobalamin biosynthetic process,			IPR002750:Cobalamin (vitamin B12) biosynthesis CbiG, core,IPR021744:Cobalamin synthesis G N-terminal,IPR021745:Cobalamin biosynthesis central region,	sty00860:Porphyrin and chlorophyll metabolism,sty01100:Metabolic pathways,			Complete proteome,	Coenzyme metabolism	chain:Protein cbiG,signal peptide,	1	1053	0.000949668
STM14_0542	GJ0703GL003468	STY0501	lyase(STY0501)	S. Typhi str. CT18	Amino acid transport and metabolism,			GO:0016829~lyase activity,	IPR001926:Tryptophan synthase beta subunit-like PLP-dependent enzymes superfamily,	sty00270:Cysteine and methionine metabolism,sty00920:Sulfur metabolism,sty01100:Metabolic pathways,sty01110:Biosynthesis of secondary metabolites,sty01120:Microbial metabolism in diverse environments,sty01130:Biosynthesis of antibiotics,sty01200:Carbon metabolism,sty01230:Biosynthesis of amino acids,			Complete proteome,Lyase,	Amino acid transport and metabolism		1	1053	0.000949668
STM14_1718	GJ0703GL002577	STY1698	type III secretion protein(ssaU)	S. Typhi str. CT18	Function unknown,	GO:0009306~protein secretion,	GO:0016021~integral component of membrane,		IPR006135:Type III secretion system substrate exporter,IPR006307:Type III secretion system, flagellar biosynthetic protein, EscU,	sty03070:Bacterial secretion system,			Complete proteome,Membrane,Transmembrane,Transmembrane helix,	Intracellular trafficking and secretion	chain:Secretion system apparatus protein ssaU,transmembrane region,	1	1056	0.00094697
STM14_1851	GJ0703GL002462	STY1530	hydrogenase-1 operon protein HyaF2(hyaF2)	S. Typhi str. CT18	Energy production and conversion,	GO:0055114~oxidation-reduction process,		GO:0005506~iron ion binding,	IPR004039:Rubredoxin-type fold,IPR006894:HupH hydrogenase expression protein, C-terminal,IPR024934:Rubredoxin-like domain,IPR024935:Rubredoxin domain,				Complete proteome,Electron transport,Iron,Metal-binding,Transport,	Energy production and conversion		1	1059	0.000944287
STM14_3392	GJ0703GL001157	STY2936	glycine betaine/L-proline transport system permease P(STY2936)	S. Typhi str. CT18		GO:0006810~transport,	GO:0005886~plasma membrane,GO:0016021~integral component of membrane,		IPR000515:Binding-protein-dependent transport systems inner membrane component,	sty02010:ABC transporters,			Complete proteome,Membrane,Transmembrane,Transmembrane helix,Transport,	Amino acid transport and metabolism	chain:Glycine betaine/L-proline transport system permease protein proW,domain:ABC transmembrane type-1,sequence conflict,topological domain:Cytoplasmic,topological domain:Periplasmic,transmembrane region,	1	1062	0.00094162
STM14_0623	GJ0703GL003391	STY0581	5-(carboxyamino)imidazole ribonucleotide synthase(STY0581)	S. Typhi str. CT18		GO:0006189~'de novo' IMP biosynthetic process,		GO:0004638~phosphoribosylaminoimidazole carboxylase activity,GO:0005524~ATP binding,GO:0034028~5-(carboxyamino)imidazole ribonucleotide synthase activity,GO:0046872~metal ion binding,	IPR003135:ATP-grasp fold, ATP-dependent carboxylate-amine ligase-type,IPR005875:Phosphoribosylaminoimidazole carboxylase, ATPase subunit,IPR011054:Rudiment single hybrid motif,IPR011761:ATP-grasp fold,IPR013816:ATP-grasp fold, subdomain 2,IPR016185:Pre-ATP-grasp domain,	sty00230:Purine metabolism,sty01100:Metabolic pathways,sty01110:Biosynthesis of secondary metabolites,sty01130:Biosynthesis of antibiotics,			ATP-binding,Complete proteome,Ligase,Nucleotide-binding,Purine biosynthesis,	Nucleotide transport and metabolism		1	1065	0.000938967
STM14_4280	GJ0703GL000366	STY4257	glycerol-3-phosphate ABC transporter ATP-binding protein(STY4257)	S. Typhi str. CT18		GO:0001407~glycerophosphodiester transport,GO:0008643~carbohydrate transport,	GO:0043190~ATP-binding cassette (ABC) transporter complex,	GO:0005524~ATP binding,GO:0015430~glycerol-3-phosphate-transporting ATPase activity,	IPR003439:ABC transporter-like,IPR003593:AAA+ ATPase domain,IPR008995:Molybdate/tungstate binding, C-terminal,IPR013611:Transport-associated OB, type 2,IPR017871:ABC transporter, conserved site,IPR017922:ABC transporter, glycerol-3-phosphate import ATP-binding protein,IPR027417:P-loop containing nucleoside triphosphate hydrolase,	sty02010:ABC transporters,		SM00382:AAA,	ATP-binding,Cell inner membrane,Cell membrane,Complete proteome,Hydrolase,Membrane,Nucleotide-binding,Sugar transport,Transport,	Carbohydrate transport and metabolism	chain:sn-glycerol-3-phosphate import ATP- binding protein ugpC,domain:ABC transporter,nucleotide phosphate-binding region:ATP,	1	1068	0.00093633
STM14_1357	GJ0703GL002817	STY1226	ribonuclease E(STY1226)	S. Typhi str. CT18		GO:0006364~rRNA processing,GO:0006402~mRNA catabolic process,GO:0008033~tRNA processing,	GO:0005737~cytoplasm,GO:0009898~cytoplasmic side of plasma membrane,	GO:0000287~magnesium ion binding,GO:0003723~RNA binding,GO:0004521~endoribonuclease activity,GO:0008270~zinc ion binding,GO:0008995~ribonuclease E activity,	IPR003029:Ribosomal protein S1, RNA-binding domain,IPR004659:Ribonuclease E/G,IPR012340:Nucleic acid-binding, OB-fold,IPR019307:RNA-binding protein AU-1/Ribonuclease E/G,IPR021968:Polyribonucleotide phosphorylase C-terminal,IPR022967:RNA-binding domain, S1,	sty03018:RNA degradation,		SM00316:SM00316,	Cell inner membrane,Cell membrane,Coiled coil,Complete proteome,Cytoplasm,Endonuclease,Hydrolase,Magnesium,Membrane,Metal-binding,Nuclease,RNA-binding,rRNA processing,tRNA processing,Zinc,	Translation, ribosomal structure and biogenesis		3	3204	0.00093633
STM14_4629	GJ0703GL000003	STY3942	recF protein(STY3942)	S. Typhi str. CT18	General function prediction only,	GO:0006260~DNA replication,GO:0006281~DNA repair,GO:0009432~SOS response,	GO:0005737~cytoplasm,	GO:0003697~single-stranded DNA binding,GO:0005524~ATP binding,	IPR001238:DNA-binding, RecF,IPR003395:RecF/RecN/SMC,IPR018078:DNA-binding, RecF, conserved site,IPR027417:P-loop containing nucleoside triphosphate hydrolase,	sty03440:Homologous recombination,			ATP-binding,Complete proteome,Cytoplasm,DNA damage,DNA repair,DNA replication,DNA-binding,Nucleotide-binding,SOS response,	DNA replication, recombination, and repair	chain:DNA replication and repair protein recF,nucleotide phosphate-binding region:ATP,sequence conflict,	1	1071	0.000933707
STM14_2937	GJ0703GL001561	STY2620	fatty acid oxidation complex subunit alpha(STY2620)	S. Typhi str. CT18		GO:0006635~fatty acid beta-oxidation,	GO:0005737~cytoplasm,	GO:0003857~3-hydroxyacyl-CoA dehydrogenase activity,GO:0004300~enoyl-CoA hydratase activity,GO:0008692~3-hydroxybutyryl-CoA epimerase activity,GO:0051287~NAD binding,	IPR001753:Crotonase superfamily,IPR006108:3-hydroxyacyl-CoA dehydrogenase, C-terminal,IPR006176:3-hydroxyacyl-CoA dehydrogenase, NAD binding,IPR006180:3-hydroxyacyl-CoA dehydrogenase, conserved site,IPR008927:6-phosphogluconate dehydrogenase, C-terminal-like,IPR012802:Fatty oxidation complex, alpha subunit FadJ,IPR013328:Dehydrogenase, multihelical,IPR016040:NAD(P)-binding domain,	sty00071:Fatty acid degradation,sty00280:Valine, leucine and isoleucine degradation,sty00281:Geraniol degradation,sty00310:Lysine degradation,sty00362:Benzoate degradation,sty00380:Tryptophan metabolism,sty00410:beta-Alanine metabolism,sty00640:Propanoate metabolism,sty00650:Butanoate metabolism,sty00903:Limonene and pinene degradation,sty00930:Caprolactam degradation,sty01040:Biosynthesis of uns…			Complete proteome,Cytoplasm,Fatty acid metabolism,Isomerase,Lipid degradation,Lipid metabolism,Lyase,Multifunctional enzyme,NAD,Oxidoreductase,	Lipid metabolism	chain:Fatty acid oxidation complex subunit alpha,region of interest:3-hydroxyacyl-CoA dehydrogenase,region of interest:Enoyl-CoA hydratase,site:Important for catalytic activity,	2	2145	0.000932401
STM14_4725	GJ0703GL004726	STY3628	4-alpha-L-fucosyltransferase(STY3628)	S. Typhi str. CT18		GO:0009246~enterobacterial common antigen biosynthetic process,	GO:0005886~plasma membrane,	GO:0008417~fucosyltransferase activity,GO:0102031~4-acetamido-4,6-dideoxy-D-galactose transferase activity,	IPR009993:4-alpha-L-fucosyltransferase,				Cell inner membrane,Cell membrane,Complete proteome,Glycosyltransferase,Membrane,Transferase,		chain:4-alpha-L-fucosyltransferase,	1	1077	0.000928505
STM14_0894	GJ0703GL003168	STY0802	FecCD family ABC transporter permease(STY0802)	S. Typhi str. CT18			GO:0005886~plasma membrane,GO:0016021~integral component of membrane,	GO:0005215~transporter activity,	IPR000522:ABC transporter, permease protein,	sty02010:ABC transporters,			Cell membrane,Complete proteome,Membrane,Transmembrane,Transmembrane helix,Transport,	Inorganic ion transport and metabolism		1	1077	0.000928505
STM14_2611	GJ0703GL001842	STY2329	tyrosine-protein kinase(wzc)	S. Typhi str. CT18		GO:0009103~lipopolysaccharide biosynthetic process,GO:0045226~extracellular polysaccharide biosynthetic process,	GO:0005886~plasma membrane,GO:0016021~integral component of membrane,	GO:0004713~protein tyrosine kinase activity,GO:0005524~ATP binding,	IPR003856:Lipopolysaccharide biosynthesis,IPR005702:Exopolysaccharide synthesis protein,IPR025669:AAA domain,IPR027417:P-loop containing nucleoside triphosphate hydrolase,				ATP-binding,Cell inner membrane,Cell membrane,Complete proteome,Exopolysaccharide synthesis,Kinase,Membrane,Nucleotide-binding,Phosphoprotein,Transferase,Transmembrane,Transmembrane helix,Tyrosine-protein kinase,	Cell envelope biogenesis, outer membrane	chain:Tyrosine-protein kinase wzc,modified residue,topological domain:Cytoplasmic,topological domain:Periplasmic,transmembrane region,	2	2157	0.000927214
STM14_0151	GJ0703GL003838	STY0145	phospho-N-acetylmuramoyl-pentapeptide-transferase(STY0145)	S. Typhi str. CT18		GO:0007049~cell cycle,GO:0008360~regulation of cell shape,GO:0009252~peptidoglycan biosynthetic process,GO:0051301~cell division,GO:0071555~cell wall organization,	GO:0005886~plasma membrane,GO:0016021~integral component of membrane,	GO:0008963~phospho-N-acetylmuramoyl-pentapeptide-transferase activity,GO:0051992~UDP-N-acetylmuramoyl-L-alanyl-D-glutamyl-meso-2,6-diaminopimelyl-D-alanyl-D-alanine:undecaprenyl-phosphate transferase activity,	IPR000715:Glycosyl transferase, family 4,IPR003524:Phospho-N-acetylmuramoyl-pentapeptide transferase,IPR018480:Phospho-N-acetylmuramoyl-pentapeptide transferase, conserved site,	sty00550:Peptidoglycan biosynthesis,sty01100:Metabolic pathways,sty01502:Vancomycin resistance,			Cell cycle,Cell division,Cell inner membrane,Cell membrane,Cell shape,Cell wall biogenesis/degradation,Complete proteome,Membrane,Peptidoglycan synthesis,Transferase,Transmembrane,Transmembrane helix,	Cell envelope biogenesis, outer membrane	chain:Phospho-N-acetylmuramoyl-pentapeptide- transferase,topological domain:Cytoplasmic,topological domain:Periplasmic,transmembrane region,	1	1080	0.000925926
STM14_4198	GJ0703GL000434	STY4310	3-dehydroquinate synthase(aroB)	S. Typhi str. CT18		GO:0008652~cellular amino acid biosynthetic process,GO:0009073~aromatic amino acid family biosynthetic process,GO:0009423~chorismate biosynthetic process,	GO:0005737~cytoplasm,	GO:0003856~3-dehydroquinate synthase activity,	IPR016037:3-dehydroquinate synthase AroB,	sty00400:Phenylalanine, tyrosine and tryptophan biosynthesis,sty01100:Metabolic pathways,sty01110:Biosynthesis of secondary metabolites,sty01130:Biosynthesis of antibiotics,sty01230:Biosynthesis of amino acids,	PIRSF001455:3-dehydroquinate synthase,		Amino-acid biosynthesis,Aromatic amino acid biosynthesis,Cobalt,Complete proteome,Cytoplasm,Lyase,NAD,Zinc,	Amino acid transport and metabolism	chain:3-dehydroquinate synthase,	1	1086	0.00092081
STM14_0133	GJ0703GL003851	STY0131	3-isopropylmalate dehydrogenase(STY0131)	S. Typhi str. CT18		GO:0009082~branched-chain amino acid biosynthetic process,GO:0009098~leucine biosynthetic process,	GO:0005737~cytoplasm,	GO:0000287~magnesium ion binding,GO:0003862~3-isopropylmalate dehydrogenase activity,GO:0051287~NAD binding,	IPR001804:Isocitrate and isopropylmalate dehydrogenases family,IPR004429:Isopropylmalate dehydrogenase,IPR019818:Isocitrate/isopropylmalate dehydrogenase, conserved site,IPR024084:Isopropylmalate dehydrogenase-like domain,	sty00290:Valine, leucine and isoleucine biosynthesis,sty00660:C5-Branched dibasic acid metabolism,sty01100:Metabolic pathways,sty01110:Biosynthesis of secondary metabolites,sty01210:2-Oxocarboxylic acid metabolism,sty01230:Biosynthesis of amino acids,		SM01329:SM01329,	Amino-acid biosynthesis,Branched-chain amino acid biosynthesis,Complete proteome,Cytoplasm,Leucine biosynthesis,Magnesium,Manganese,Metal-binding,NAD,Oxidoreductase,	Amino acid transport and metabolism	binding site:Substrate,chain:3-isopropylmalate dehydrogenase,helix,metal ion-binding site:Magnesium or manganese,nucleotide phosphate-binding region:NAD,sequence conflict,site:Important for catalysis,strand,turn,	1	1089	0.000918274
STM14_2157	GJ0703GL002180	STY1910	ATP/GTP-binding protein(STY1910)	S. Typhi str. CT18				GO:0005524~ATP binding,GO:0005525~GTP binding,GO:0016887~ATPase activity,GO:0043022~ribosome binding,GO:0043023~ribosomal large subunit binding,	IPR004396:Conserved hypothetical protein CHP00092,IPR006073:GTP binding domain,IPR012675:Beta-grasp domain,IPR012676:TGS-like,IPR013029:Domain of unknown function DUF933,IPR023192:TGS-like domain,IPR027417:P-loop containing nucleoside triphosphate hydrolase,		PIRSF006641:GTP-dependent nucleic acid-binding protein, EngD type,		ATP-binding,Complete proteome,Nucleotide-binding,	Translation, ribosomal structure and biogenesis		1	1089	0.000918274
STM14_0444	GJ0703GL003557	STY0409	lipoprotein(yaiW)	S. Typhi str. CT18					IPR011673:Protein of unknown function DUF1615,				Complete proteome,Lipoprotein,		signal peptide,	1	1092	0.000915751
STM14_5375	GJ0703GL004173	STY4817	inner membrane protein(STY4817)	S. Typhi str. CT18	General function prediction only,	GO:0055085~transmembrane transport,	GO:0043190~ATP-binding cassette (ABC) transporter complex,		IPR005495:Permease YjgP/YjgQ, predicted,	sty02010:ABC transporters,			Complete proteome,Membrane,Transmembrane,Transmembrane helix,	General function prediction only		1	1098	0.000910747
STM14_4923	GJ0703GL004555	STY3775	primosomal protein replication factor(STY3775)	S. Typhi str. CT18		GO:0006268~DNA unwinding involved in DNA replication,GO:0006269~DNA replication, synthesis of RNA primer,	GO:1990077~primosome complex,	GO:0003677~DNA binding,GO:0004003~ATP-dependent DNA helicase activity,GO:0005524~ATP binding,GO:0008270~zinc ion binding,	IPR001650:Helicase, C-terminal,IPR005259:Primosomal protein n,IPR011545:DNA/RNA helicase, DEAD/DEAH box type, N-terminal,IPR014001:Helicase, superfamily 1/2, ATP-binding domain,IPR027417:P-loop containing nucleoside triphosphate hydrolase,	sty03440:Homologous recombination,		SM00487:DEXDc,SM00490:HELICc,	ATP-binding,Complete proteome,DNA replication,DNA-binding,Helicase,Hydrolase,Metal-binding,Nucleotide-binding,Primosome,Zinc,Zinc-finger,	DNA replication, recombination, and repair		2	2196	0.000910747
STM14_0510	GJ0703GL003498	STY0470	2-aminoethylphosphonate:pyruvate aminotransferase(phnW)	S. Typhi str. CT18		GO:0019700~organic phosphonate catabolic process,		GO:0047304~2-aminoethylphosphonate-pyruvate transaminase activity,	IPR000192:Aminotransferase, class V/Cysteine desulfurase,IPR012703:2-aminoethylphosphonate--pyruvate transaminase,IPR015421:Pyridoxal phosphate-dependent transferase, major region, subdomain 1,IPR015422:Pyridoxal phosphate-dependent transferase, major region, subdomain 2,IPR015424:Pyridoxal phosphate-dependent transferase,IPR024169:Serine-pyruvate aminotransferase/2-aminoethylphosphonate-pyruvate…	sty00440:Phosphonate and phosphinate metabolism,sty01100:Metabolic pathways,sty01120:Microbial metabolism in diverse environments,	PIRSF000524:serine--pyruvate aminotransferase,		Aminotransferase,Complete proteome,Pyridoxal phosphate,Pyruvate,Transferase,	Amino acid transport and metabolism	binding site:Pyridoxal phosphate,chain:2-aminoethylphosphonate--pyruvate transaminase,helix,modified residue,mutagenesis site,region of interest:Pyridoxal phosphate binding,strand,turn,	1	1101	0.000908265
STM14_4716	GJ0703GL004735	STY3637	undecaprenyl-phosphate alpha-N-acetylglucosaminyltransferase(STY3637)	S. Typhi str. CT18	Cell envelope biogenesis, outer membrane,	GO:0009103~lipopolysaccharide biosynthetic process,GO:0009243~O antigen biosynthetic process,GO:0009246~enterobacterial common antigen biosynthetic process,GO:0044038~cell wall macromolecule biosynthetic process,GO:0071555~cell wall organization,	GO:0005887~integral component of plasma membrane,GO:0009276~Gram-negative-bacterium-type cell wall,	GO:0000287~magnesium ion binding,GO:0008963~phospho-N-acetylmuramoyl-pentapeptide-transferase activity,GO:0016757~transferase activity, transferring glycosyl groups,GO:0016780~phosphotransferase activity, for other substituted phosphate groups,GO:0030145~manganese ion binding,GO:0036380~UDP-N-acetylglucosamine-undecaprenyl-phosphate N-acetylglucosaminephosphotransferase activity,	IPR000715:Glycosyl transferase, family 4,IPR012750:Undecaprenyl-phosphate alpha-N-acetylglucosaminyl 1-phosphatetransferase,				Cell inner membrane,Cell membrane,Complete proteome,Glycosyltransferase,Lipopolysaccharide biosynthesis,Magnesium,Manganese,Membrane,Transferase,Transmembrane,Transmembrane helix,	Cell envelope biogenesis, outer membrane	chain:Undecaprenyl-phosphate alpha-N- acetylglucosaminyl 1-phosphate transferase,sequence conflict,transmembrane region,	1	1101	0.000908265
STM14_1412	GJ0703GL002765	STY1274	tRNA (5-methylaminomethyl-2-thiouridylate)-methyltransferase(STY1274)	S. Typhi str. CT18		GO:0006400~tRNA modification,	GO:0005737~cytoplasm,	GO:0000049~tRNA binding,GO:0005524~ATP binding,GO:0016783~sulfurtransferase activity,	IPR004506:tRNA-specific 2-thiouridylase,IPR014729:Rossmann-like alpha/beta/alpha sandwich fold,IPR023382:Adenine nucleotide alpha hydrolase-like domains,	sty04122:Sulfur relay system,			ATP-binding,Complete proteome,Cytoplasm,Disulfide bond,Nucleotide-binding,RNA-binding,Transferase,tRNA processing,tRNA-binding,	Translation, ribosomal structure and biogenesis	active site:Cysteine persulfide intermediate,active site:Nucleophile,binding site:ATP; via amide nitrogen,binding site:ATP; via amide nitrogen and carbonyl oxygen,chain:tRNA-specific 2-thiouridylase mnmA,disulfide bond,nucleotide phosphate-binding region:ATP,region of interest:Interaction with target base in tRNA,region of interest:Interaction with tRNA,site:Interaction with tRNA,	1	1104	0.000905797
STM14_960	GJ0703GL003107	STY0865	mechanosensitive channel protein(STY0865)	S. Typhi str. CT18		GO:0055085~transmembrane transport,	GO:0016021~integral component of membrane,		IPR006685:Mechanosensitive ion channel MscS,IPR010920:Like-Sm (LSM) domain,IPR011014:Mechanosensitive ion channel MscS, transmembrane-2,IPR011066:Mechanosensitive ion channel MscS, C-terminal,				Complete proteome,Membrane,Signal,Transmembrane,Transmembrane helix,	Cell envelope biogenesis, outer membrane		2	2220	0.000900901
STM14_2196	GJ0703GL002142	STY1947	ribonuclease D(STY1947)	S. Typhi str. CT18		GO:0042780~tRNA 3'-end processing,	GO:0005737~cytoplasm,	GO:0000166~nucleotide binding,GO:0003676~nucleic acid binding,GO:0008408~3'-5' exonuclease activity,GO:0033890~ribonuclease D activity,	IPR002121:HRDC domain,IPR002562:3'-5' exonuclease domain,IPR006292:Ribonuclease D,IPR010997:HRDC-like,IPR012337:Ribonuclease H-like domain,			SM00341:HRDC,SM00474:35EXOc,	Complete proteome,Cytoplasm,Exonuclease,Hydrolase,Nuclease,tRNA processing,	Translation, ribosomal structure and biogenesis		1	1113	0.000898473
STM14_5337	GJ0703GL004210	STY4785	hypothetical protein(STY4785)	S. Typhi str. CT18				GO:0016740~transferase activity,	IPR006337:Pyridoxal phosphate-dependent enzyme, SelA-like,IPR015421:Pyridoxal phosphate-dependent transferase, major region, subdomain 1,IPR015424:Pyridoxal phosphate-dependent transferase,IPR018319:L-seryl-tRNA selenium transferase-like,	sty00450:Selenocompound metabolism,sty00970:Aminoacyl-tRNA biosynthesis,			Complete proteome,Pyridoxal phosphate,Transferase,	Amino acid transport and metabolism		1	1116	0.000896057
STM14_3564	GJ0703GL000994	STY3094	GTP pyrophosphokinase(relA)	S. Typhi str. CT18		GO:0015969~guanosine tetraphosphate metabolic process,		GO:0016301~kinase activity,GO:0016597~amino acid binding,	IPR002912:ACT domain,IPR003607:HD/PDEase domain,IPR004095:TGS,IPR004811:RelA/SpoT family,IPR007685:RelA/SpoT,IPR012675:Beta-grasp domain,IPR012676:TGS-like,	sty00230:Purine metabolism,		SM00954:SM00954,	Complete proteome,Kinase,Transferase,	Signal transduction mechanisms / Transcription		2	2232	0.000896057
STM14_1407	GJ0703GL002770	STY1269	hypothetical protein(STY1269)	S. Typhi str. CT18	Function unknown,		GO:0005840~ribosome,		IPR003347:JmjC domain,			SM00558:JmjC,	Complete proteome,Ribonucleoprotein,Ribosomal protein,	Function unknown		1	1119	0.000893655
STM14_4038	GJ0703GL000570	STY3526	ATP/GTP-binding protein(STY3526)	S. Typhi str. CT18	General function prediction only,	GO:0007049~cell cycle,GO:0051301~cell division,	GO:0005737~cytoplasm,	GO:0005524~ATP binding,GO:0016887~ATPase activity,	IPR005654:ATPase, AFG1-like,IPR027417:P-loop containing nucleoside triphosphate hydrolase,				ATP-binding,Cell cycle,Cell division,Complete proteome,Cytoplasm,Hydrolase,Nucleotide-binding,	General function prediction only		1	1122	0.000891266
STM14_4723	GJ0703GL004728	STY3630	lipopolysaccharide biosynthesis protein(STY3630)	S. Typhi str. CT18	Cell envelope biogenesis, outer membrane,	GO:0009246~enterobacterial common antigen biosynthetic process,		GO:0019180~dTDP-4-amino-4,6-dideoxygalactose transaminase activity,GO:0030170~pyridoxal phosphate binding,	IPR000653:DegT/DnrJ/EryC1/StrS aminotransferase,IPR012749:TDP-4-keto-6-deoxy-D-glucose transaminase,IPR015421:Pyridoxal phosphate-dependent transferase, major region, subdomain 1,IPR015422:Pyridoxal phosphate-dependent transferase, major region, subdomain 2,IPR015424:Pyridoxal phosphate-dependent transferase,		PIRSF000390:pyridoxal dependent aminotransferase, DegT/DnrJ/EryC1/StrS types,		Complete proteome,Pyridoxal phosphate,Transferase,	Cell envelope biogenesis, outer membrane		1	1128	0.000886525
STM14_5000	GJ0703GL004506	STY3726	thiamine biosynthesis protein ThiH(STY3726)	S. Typhi str. CT18		GO:0009228~thiamine biosynthetic process,		GO:0003824~catalytic activity,GO:0005506~iron ion binding,GO:0051539~4 iron, 4 sulfur cluster binding,	IPR007197:Radical SAM,IPR010722:Biotin/thiamin synthesis-associated protein,IPR012726:Thiazole biosynthesis ThiH,IPR013785:Aldolase-type TIM barrel,	sty00730:Thiamine metabolism,sty01100:Metabolic pathways,		SM00876:SM00876,	4Fe-4S,Complete proteome,Iron,Iron-sulfur,Metal-binding,S-adenosyl-L-methionine,	Coenzyme metabolism / General function prediction only	chain:Thiazole biosynthesis protein thiH,metal ion-binding site:Iron-sulfur (4Fe-4S-S-AdoMet),	1	1131	0.000884173
STM14_2918	GJ0703GL001577	STY2601	erythronate-4-phosphate dehydrogenase(STY2601)	S. Typhi str. CT18		GO:0008615~pyridoxine biosynthetic process,	GO:0005737~cytoplasm,	GO:0033711~4-phosphoerythronate dehydrogenase activity,GO:0051287~NAD binding,	IPR006139:D-isomer specific 2-hydroxyacid dehydrogenase, catalytic domain,IPR006140:D-isomer specific 2-hydroxyacid dehydrogenase, NAD-binding,IPR016040:NAD(P)-binding domain,IPR020921:Erythronate-4-phosphate dehydrogenase,IPR024531:Erythronate-4-phosphate dehydrogenase, dimerisation domain,	sty00750:Vitamin B6 metabolism,sty01100:Metabolic pathways,			Complete proteome,Cytoplasm,NAD,Oxidoreductase,Pyridoxine biosynthesis,	Amino acid transport and metabolism	active site:Proton donor,binding site:NAD,binding site:NAD; via amide nitrogen,binding site:NAD; via carbonyl oxygen,binding site:Substrate,chain:Erythronate-4-phosphate dehydrogenase,	1	1134	0.000881834
STM14_4475	GJ0703GL000135	STY4081	lipopolysaccharide 1,2-N-acetylglucosaminetransferase(waaK)	S. Typhi str. CT18	Cell envelope biogenesis, outer membrane,			GO:0008917~lipopolysaccharide N-acetylglucosaminyltransferase activity,	IPR001296:Glycosyl transferase, family 1,	sty00540:Lipopolysaccharide biosynthesis,sty01100:Metabolic pathways,			Complete proteome,Glycosyltransferase,Transferase,			1	1143	0.000874891
STM14_1802	GJ0703GL002505	STY1573	ABC transporter ATP-binding protein(STY1573)	S. Typhi str. CT18	Amino acid transport and metabolism,	GO:0031460~glycine betaine transport,	GO:0016020~membrane,	GO:0005524~ATP binding,GO:0016887~ATPase activity,	IPR000644:Cystathionine beta-synthase, core,IPR003439:ABC transporter-like,IPR003593:AAA+ ATPase domain,IPR005892:Glycine betaine transport ATP-binding subunit,IPR017871:ABC transporter, conserved site,IPR027417:P-loop containing nucleoside triphosphate hydrolase,	sty02010:ABC transporters,		SM00116:CBS,SM00382:AAA,	ATP-binding,Complete proteome,Nucleotide-binding,	Amino acid transport and metabolism		1	1146	0.0008726
STM14_0899	GJ0703GL003164	STY0807	galactokinase(STY0807)	S. Typhi str. CT18		GO:0006012~galactose metabolic process,	GO:0005737~cytoplasm,	GO:0000287~magnesium ion binding,GO:0004335~galactokinase activity,GO:0005524~ATP binding,	IPR000705:Galactokinase,IPR006203:GHMP kinase, ATP-binding, conserved site,IPR006204:GHMP kinase N-terminal domain,IPR006206:Mevalonate/galactokinase,IPR013750:GHMP kinase, C-terminal domain,IPR014721:Ribosomal protein S5 domain 2-type fold, subgroup,IPR019539:Galactokinase galactose-binding domain,IPR019741:Galactokinase, conserved site,IPR020568:Ribosomal protein S5 domain 2-type fold,IPR022963…	sty00052:Galactose metabolism,sty00520:Amino sugar and nucleotide sugar metabolism,sty01100:Metabolic pathways,	PIRSF000530:galactokinase,		ATP-binding,Carbohydrate metabolism,Complete proteome,Cytoplasm,Galactose metabolism,Kinase,Magnesium,Metal-binding,Nucleotide-binding,Transferase,	Carbohydrate transport and metabolism	chain:Galactokinase,nucleotide phosphate-binding region:ATP,sequence conflict,	1	1146	0.0008726
STM14_0271	GJ0703GL003710	STY0252	lipid-A-disaccharide synthase(STY0252)	S. Typhi str. CT18		GO:0009245~lipid A biosynthetic process,		GO:0008915~lipid-A-disaccharide synthase activity,	IPR003835:Glycosyl transferase, family 19,	sty00540:Lipopolysaccharide biosynthesis,sty01100:Metabolic pathways,			Complete proteome,Glycosyltransferase,Lipid A biosynthesis,Lipid biosynthesis,Lipid metabolism,Transferase,	Cell envelope biogenesis, outer membrane	chain:Lipid-A-disaccharide synthase,	1	1146	0.0008726
STM14_4955	GJ0703GL004534	STY3753	acetylornithine deacetylase(STY3753)	S. Typhi str. CT18	Amino acid transport and metabolism,	GO:0006526~arginine biosynthetic process,	GO:0005737~cytoplasm,	GO:0008237~metallopeptidase activity,GO:0008270~zinc ion binding,GO:0008777~acetylornithine deacetylase activity,	IPR001261:ArgE/DapE/ACY1/CPG2/YscS, conserved site,IPR002933:Peptidase M20,IPR010169:Acetylornithine deacetylase (ArgE),IPR011650:Peptidase M20, dimerisation domain,	sty00220:Arginine biosynthesis,sty01100:Metabolic pathways,sty01110:Biosynthesis of secondary metabolites,sty01130:Biosynthesis of antibiotics,sty01210:2-Oxocarboxylic acid metabolism,sty01230:Biosynthesis of amino acids,			Amino-acid biosynthesis,Arginine biosynthesis,Cobalt,Complete proteome,Cytoplasm,Hydrolase,Metal-binding,Zinc,	Amino acid transport and metabolism	active site:Proton acceptor,chain:Acetylornithine deacetylase,metal ion-binding site:Cobalt or zinc 1,metal ion-binding site:Cobalt or zinc 2,sequence conflict,	1	1149	0.000870322
STM14_2574	GJ0703GL001869	STY2289	UDP-glucose 6-dehydrogenase(ugd)	S. Typhi str. CT18	Cell envelope biogenesis, outer membrane,	GO:0000271~polysaccharide biosynthetic process,		GO:0003979~UDP-glucose 6-dehydrogenase activity,GO:0051287~NAD binding,	IPR001732:UDP-glucose/GDP-mannose dehydrogenase, N-terminal,IPR008927:6-phosphogluconate dehydrogenase, C-terminal-like,IPR013328:Dehydrogenase, multihelical,IPR014026:UDP-glucose/GDP-mannose dehydrogenase, dimerisation,IPR014027:UDP-glucose/GDP-mannose dehydrogenase, C-terminal,IPR016040:NAD(P)-binding domain,IPR017476:Nucleotide sugar dehydrogenase,	sty00040:Pentose and glucuronate interconversions,sty00053:Ascorbate and aldarate metabolism,sty00520:Amino sugar and nucleotide sugar metabolism,sty01100:Metabolic pathways,	PIRSF000124:UDP-glucose/GDP-mannose dehydrogenase,PIRSF500134:UDP-glucose 6-dehydrogenase, bacterial type [Parent=PIRSF000124],	SM00984:SM00984,	Complete proteome,Oxidoreductase,	Cell envelope biogenesis, outer membrane		1	1164	0.000859107
STM14_4016	GJ0703GL000588	STY3507	aerobic respiration control sensor protein(STY3507)	S. Typhi str. CT18		GO:0006351~transcription, DNA-templated,GO:0006355~regulation of transcription, DNA-templated,	GO:0005622~intracellular,GO:0005886~plasma membrane,GO:0016021~integral component of membrane,	GO:0000155~phosphorelay sensor kinase activity,GO:0005524~ATP binding,	IPR000014:PAS domain,IPR000700:PAS-associated, C-terminal,IPR001789:Signal transduction response regulator, receiver domain,IPR003594:Histidine kinase-like ATPase, ATP-binding domain,IPR003661:Signal transduction histidine kinase, subgroup 1, dimerisation/phosphoacceptor domain,IPR004358:Signal transduction histidine kinase-related protein, C-terminal,IPR005467:Signal transduction histidine kinas…	sty02020:Two-component system,	PIRSF003182:aerobic respiration control hybrid signal transduction histidine kinase ArcB,	SM00073:HPT,SM00091:PAS,SM00387:HATPase_c,SM00388:HisKA,SM00448:REC,	ATP-binding,Cell inner membrane,Cell membrane,Coiled coil,Complete proteome,Kinase,Membrane,Nucleotide-binding,Phosphoprotein,Transcription,Transcription regulation,Transferase,Transmembrane,Transmembrane helix,Two-component regulatory system,	Signal transduction mechanisms	signal peptide,	2	2334	0.000856898
STM14_0693	GJ0703GL003325	STY0639	isochorismate synthase EntC(STY0639)	S. Typhi str. CT18	Coenzyme metabolism / Secondary metabolites biosynthesis, transport, and catabolism,	GO:0009058~biosynthetic process,		GO:0008909~isochorismate synthase activity,	IPR004561:Isochorismate synthase,IPR005801:ADC synthase,IPR015890:Chorismate binding, C-terminal,	sty00130:Ubiquinone and other terpenoid-quinone biosynthesis,sty01053:Biosynthesis of siderophore group nonribosomal peptides,sty01100:Metabolic pathways,sty01110:Biosynthesis of secondary metabolites,sty01130:Biosynthesis of antibiotics,			Complete proteome,	Coenzyme metabolism / Secondary metabolites biosynthesis, transport, and catabolism		1	1173	0.000852515
[truncated: 202 more rows]
